# Supplementary material for: Impact of school closures on the health and well-being of primary school children in Wales UK: a routine data linkage study using the HAPPEN Survey (2018–2020)
Source: PubMed Central journal article supplement — BMJ Open. 2021 Oct 8;11(10):e051574. doi: 10.1136/bmjopen-2021-051574 (PMC8503919; doi:10.1136/bmjopen-2021-051574), 2021-10-08
Supplement: bmjopen-2021-051574.draft_revisions.pdf [file bmjopen-2021-051574.draft_revisions.pdf]

# BMJ Open

BMJ Open is committed to open peer review. As part of this commitment we make the peer review history of every article we publish publicly available.

When an article is published we post the peer reviewers' comments and the authors' responses online. We also post the versions of the paper that were used during peer review. These are the versions that the peer review comments apply to.

The versions of the paper that follow are the versions that were submitted during the peer review process. They are not the versions of record or the final published versions. They should not be cited or distributed as the published version of this manuscript.

BMJ Open is an open access journal and the full, final, typeset and author-corrected version of record of the manuscript is available on our site with no access controls, subscription charges or pay-per-view fees (<http://bmjopen.bmj.com>).

If you have any questions on BMJ Open's open peer review process please email [info.bmjopen@bmj.com](mailto:info.bmjopen@bmj.com)

# BMJ Open

## Impact of school closures on the health and well-being of primary school children in Wales UK; a routine data linkage study using the HAPPEN survey (2018-2020).

|                               |                                                                                                                                                                                                                                                                                                             |
|-------------------------------|-------------------------------------------------------------------------------------------------------------------------------------------------------------------------------------------------------------------------------------------------------------------------------------------------------------|
| Journal:                      | <i>BMJ Open</i>                                                                                                                                                                                                                                                                                             |
| Manuscript ID                 | bmjopen-2021-051574                                                                                                                                                                                                                                                                                         |
| Article Type:                 | Original research                                                                                                                                                                                                                                                                                           |
| Date Submitted by the Author: | 23-Mar-2021                                                                                                                                                                                                                                                                                                 |
| Complete List of Authors:     | James, M; Swansea University, Medical School<br>Marchant, Emily ; Swansea University, Medical School<br>Defeyter, Margaret; Northumbria University, Department of Psychology<br>Woodside, Jayne; Queen's University Belfast, Centre for Public Health<br>Brophy, Sinead; Swansea University, Medical School |
| Keywords:                     | COVID-19, Public health < INFECTIOUS DISEASES, Community child health < PAEDIATRICS                                                                                                                                                                                                                         |
|                               |                                                                                                                                                                                                                                                                                                             |

SCHOLARONE™  
Manuscripts

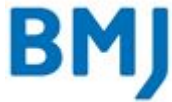

I, the Submitting Author has the right to grant and does grant on behalf of all authors of the Work (as defined in the below author licence), an exclusive licence and/or a non-exclusive licence for contributions from authors who are: i) UK Crown employees; ii) where BMJ has agreed a CC-BY licence shall apply, and/or iii) in accordance with the terms applicable for US Federal Government officers or employees acting as part of their official duties; on a worldwide, perpetual, irrevocable, royalty-free basis to BMJ Publishing Group Ltd ("BMJ") its licensees and where the relevant Journal is co-owned by BMJ to the co-owners of the Journal, to publish the Work in this journal and any other BMJ products and to exploit all rights, as set out in our [licence](#).

The Submitting Author accepts and understands that any supply made under these terms is made by BMJ to the Submitting Author unless you are acting as an employee on behalf of your employer or a postgraduate student of an affiliated institution which is paying any applicable article publishing charge ("APC") for Open Access articles. Where the Submitting Author wishes to make the Work available on an Open Access basis (and intends to pay the relevant APC), the terms of reuse of such Open Access shall be governed by a Creative Commons licence – details of these licences and which [Creative Commons](#) licence will apply to this Work are set out in our licence referred to above.

Other than as permitted in any relevant BMJ Author's Self Archiving Policies, I confirm this Work has not been accepted for publication elsewhere, is not being considered for publication elsewhere and does not duplicate material already published. I confirm all authors consent to publication of this Work and authorise the granting of this licence.

1  
2  
3 **Impact of school closures on the health and well-being of primary school children in Wales UK;**  
4 **a routine data linkage study using the HAPPEN survey (2018-2020).**  
5  
6  
7

8 Dr Michaela James PhD<sup>1</sup>, Dr Emily Marchant PhD<sup>1</sup>, Professor Margaret A. Defeyter PhD<sup>2</sup>, Professor  
9 Jayne V. Woodside PhD<sup>3</sup> and Professor Sinead Brophy PhD<sup>1</sup>  
10  
11

12 Corresponding Author:

13 Dr Michaela James, PhD

14 m.l.james@swansea.ac.uk

15 Swansea University Medical School, Data Science Building, Swansea University, Singleton Park,  
16 Swansea, SA2 8PP

17 Telephone: 0792 606716  
18  
19  
20  
21  
22

23 1. Swansea University Medical School, Data Science Building, Swansea University, Singleton Park,  
24 Swansea, SA2 8PP

25 2. Department of Social Work, Education and Community Wellbeing, Northumbria University,  
26 Newcastle, NE7 7XA

27 3. Centre for Public Health, School of Medicine, Dentistry and Biomedical Sciences, Queen's  
28 University Belfast, Belfast, BT12 6BJ  
29  
30  
31  
32  
33  
34  
35  
36  
37  
38  
39  
40  
41  
42  
43  
44  
45  
46  
47  
48  
49  
50  
51  
52  
53  
54  
55  
56  
57  
58  
59  
60

## Abstract

### Objectives

This study aimed to explore the impact of school closures on children's health by comparing health and wellbeing outcomes collected during school closures (April – June 2020) via the 'HAPPEN At Home' survey with data from the same period in 2019 and 2018 via the HAPPEN survey.

### Setting

The study was conducted online due to COVID-19 restrictions. 161 primary schools across Wales were involved in the 'HAPPEN At Home' survey.

### Participants

Data were collected online via the 'HAPPEN At Home' survey, which captured the typical health behaviours of children aged 8 – 11 years between April - June 2020 from 1333 participants across 161 primary schools across Wales. These data were compared with data in 2018 and 2019 also collected between April-June, from HAPPEN [2019 (n=1150) and 2018 (n=475)].

### Primary and secondary outcomes measures

Primary outcomes included validated measures of physical activity, sedentary time, diet and dental health, as well as wellbeing, competency and autonomy. Free school meal (FSM) status was used as a proxy for socio-economic deprivation. Analyses were repeated stratifying by FSM.

### Results

Comparing responses between April – June in 2020 (n=1068), 2019 (n=1150) and 2018 (n=475), there were improvements in physical activity levels, sleep time, happiness and general wellbeing for children during school closures compared to previous years. However, children on FSM ate less fruit and vegetables (21% (95%CI (5.7% to 37%)) and had lower self-assessed school competence compared to 2019. Compared to those not on FSM they also spent less time doing physical activity (13.03% (95%CI: 3.3% to 21.7%)) and consumed more takeaways (16.3% (95%CI: 2%-30%)) during school closures.

### Conclusions

This study suggests that schools play are important in reducing inequalities in physical health. The physical health (e.g., physical activity and diet) of children eligible for FSM may be impacted by prolonged school closures.

## Article summary

### Strengths and limitations of this study

- This study provides evidence of any differences in the health and wellbeing of children prior to and during the COVID-19 enforced lockdown and school closures between March and June 2020. These findings could have a significant impact for the future and support schools to better understand their pupil's physical, psychological, emotional and social health. It also contributes to a significant literature gap regarding the impact of school closures on school-aged children.
- Improvements in physical activity levels, sleep time, happiness and general wellbeing were observed in general for children during school closures compared to previous years. However, children on FSM reported eating less fruit and vegetables and had lower self-assessed school competence compared to 2019. Compared to those not on FSM they also spent less time doing physical activity and consumed more takeaways during school closures. These trends are not evident among children not on FSM. All children reported improvements in wellbeing during lockdown especially on the happiness with family measure.
- Overall, findings suggest schools help to reduce inequalities in physical health for socio-economically deprived children. During school closures children from deprived backgrounds are likely to have poorer physical health (e.g. less time spent doing physical activities and poorer diet) and this is not observed in children who are not in receipt of FSM. This research suggests that school closures will result in widening health inequalities and when schools return measures will need to be in place to readdress the widened gap in physical health.
- Although the 'HAPPEN At Home' survey was made available to all children aged 8-11 across Wales, the findings of this paper only present those who participated in the survey and a subsample who consented to data linkage. However, HAPPEN contributes to a significant gap in the knowledge around the pandemic's impact on children as reported by children and not adults.

## Introduction

In early March 2020, the World Health Organisation (WHO) declared the coronavirus disease (COVID-19) to be a global pandemic<sup>1,2</sup>. To reduce the risk of person-to-person transmission, a wide range of public health measures were implemented by governments worldwide. These included the closure of educational settings in order to reduce the number of social contacts between pupils<sup>3,4</sup>. By April 2020, the United Nation's Educational, Scientific and Cultural Organisation (UNESCO) estimated that 138 countries had implemented national school closures, impacting around 80% of children worldwide<sup>4</sup>.

There is an ongoing debate regarding the effectiveness of schools closures on transmission rates<sup>4-6</sup> but the fact schools were closed for a long period of time could have had detrimental impacts on pupil's physical and mental health<sup>4,5,7,8</sup>. School closures may have reduced opportunities for physical activity, extracurricular activities, school meals and social interaction<sup>9-12</sup>. Research shows that when children are out of school (e.g. weekends and holidays) they are less physically active, have longer screen time, irregular sleep patterns, less favourable diets, weight gain and a loss of cardiorespiratory fitness<sup>5,13</sup>. This is noted to be particularly detrimental for those from more deprived backgrounds<sup>4,6,10,12</sup>.

A report by the Royal Society's Data Evaluation and Learning for Viral Epidemics (DELVE) group highlighted concerns regarding the increased inequalities in children's physical and mental health as a result of school closures<sup>14</sup>. For example, pre-existing inequalities such as food poverty are likely to be exacerbated through reduced access to free school meals<sup>15</sup>. Thus, there is a real possibility that, in addition to a widening of the educational attainment gap, school closures are likely to result in widening inequalities in children's physical health, mental wellbeing, and health related behaviours.

This study aims to; 1) compare children's health and wellbeing during school closures in 2020 with the same period in 2019 and 2018 and, 2) stratify the before and during period of school closures by socio-economic deprivation (as measured by free school meal (FSM) eligibility).

## Methods

### *Study Design*

The HAPPEN Wales network was established at Swansea University in 2015 following research with headteachers who advocated for collaboration and a joined up approach to prioritising health and wellbeing within the school setting<sup>16</sup>. The network involves children aged 8–11 years completing the

1  
2  
3 HAPPEN Survey, an online self-report questionnaire that was developed and designed with children.  
4 The survey captures a range of information on health and wellbeing including nutrition, physical  
5 activity, sleep, wellbeing and concentration<sup>17</sup>. Prior to school closures, children completed the survey  
6 within the school setting during curriculum time. A data collection and feedback system is achieved  
7 by sharing group-level results to schools as a school report tailored to the curriculum. Annual reports  
8 are also shared with key stakeholders in health and education.  
9  
10  
11  
12  
13

14 In light of the COVID-19 pandemic, HAPPEN aimed to understand how school closures were  
15 affecting the health and wellbeing of children in Wales. Therefore, the original HAPPEN Survey was  
16 adapted to the ‘HAPPEN At Home’ survey to capture changes in health behaviours due to school  
17 closures and provide schools the opportunity to gain a better understanding of pupil’s health and  
18 wellbeing. This enabled schools to plan for and address any concerns they identified within their  
19 ‘HAPPEN At Home’ report during the return to school. The survey was granted ethical approval by  
20 Swansea University’s Medical School on 15/04/2020 (Reference: 2017-0033B).  
21  
22  
23  
24  
25

### 26 27 *Participants*

28  
29  
30 Recruitment of participants and data collection was delivered online due to COVID-19 restrictions.  
31 Pre-existing HAPPEN schools were emailed initially inviting them to participate in the ‘HAPPEN At  
32 Home’ survey. Next the survey was then opened wider and all primary schools in Wales were  
33 contacted through a number of methods including direct email, a social media campaign (paid  
34 advertisement on Facebook and Twitter) and promotion from key stakeholders (e.g. regional  
35 education consortia). Schools were invited to share details of the survey (including study aims and  
36 information sheet) amongst parents/guardians so that children could complete the survey at home at a  
37 convenient time. Communication between schools and parents/guardians was achieved through  
38 existing channels such as text messages, newsletters and social media. This is the same sampling  
39 method as the 2019 data however, 2018 data was collected in South Wales as the network was not  
40 pan-Wales in 2018.  
41  
42  
43  
44  
45  
46  
47  
48

### 49 *Patient and Public Involvement*

50  
51  
52 The research question was developed as a result of national school closures due to COVID-19 across  
53 the UK. The HAPPEN Survey was rapidly adapted to the HAPPEN at Home survey to address a  
54 significant gap regarding child-reported behaviours during school closures. The survey development  
55 involved input from key stakeholders including regional education consortia and primary school staff  
56 to ensure applicability of findings. The adapted HAPPEN at Home survey aimed to capture child-  
57 reported health and wellbeing during school closures in order to support schools in tailor health and  
58  
59  
60



1  
2  
3 wellbeing plans to suit the needs of their learners. Findings from the study will be reported back to  
4 schools via a report and social media dissemination.  
5  
6  
7

### 8 *Data Collection*

9

10  
11 Primary data were collected via the ‘HAPPEN At Home’ Survey between April and June 2020. The  
12 survey captured the typical health behaviours of children aged 8-11. Items included validated  
13 measures of physical activity, sedentary time, diet and dental health<sup>18</sup>, as well as wellbeing,  
14 competency and autonomy. Items included in the analyses are presented as supplementary  
15 information (S1). The full versions of the ‘HAPPEN At Home’ and original HAPPEN survey can be  
16 viewed in the supplementary information (S2 and S3 respectively).  
17  
18  
19  
20  
21

22 The survey was conducted online and could be completed by children at home or in school (key  
23 worker or vulnerable children) via mobile phone, tablet and computer. The process of data coding  
24 involved two researchers. The first researcher downloaded the raw data, cleaned the data, checked for  
25 duplicates, generated a unique participant ID number and removed identifiable information. This  
26 process protects participants’ anonymity by ensuring that the second researcher generating the report  
27 and conducting the analysis could not identify individuals. Raw data was coded using STATA  
28 (version 16) to produce a dataset for the purpose of analyses.  
29  
30  
31  
32  
33

34 Free school meal (FSM) status was used as a proxy for deprivation<sup>19</sup> and was obtained via the Secure  
35 Anonymised Information Linkage (SAIL) Databank<sup>20</sup>. To link the data, the demographic data are  
36 separated from the responses and sent to a trusted third party, NHS Wales Informatics Service (NWIS)  
37 and the response data goes to SAIL using a secure file upload. A unique Anonymous Linking Field  
38 (ALF) is assigned to the person-based record before it is joined to clinical data via a system linking  
39 field.  
40  
41  
42  
43  
44

### 45 *Analysis*

46

47  
48 Primary analysis looked at whole group mean comparison of all children from 2018 and 2019 (pre-  
49 school closures) to 2020 (school closures). Secondary analysis included the subset of children from  
50 2019-2020 stratified by FSM. The 2018 data was used to account for annual trends prior to lockdown.  
51  
52  
53  
54

55 For this paper, school closure was categorised as the period between 20<sup>th</sup> March 2020; the date in  
56 which the Minister for Education in Wales set for the closure of statutory education provision and 29<sup>th</sup>  
57 June 2020; the date in which schools returned for a phased approach in Wales. The ‘HAPPEN At  
58 Home’ survey was launched in 23<sup>rd</sup> April 2020 and closed on the 26<sup>th</sup> June 2020. Analysis was carried  
59  
60

out in November 2020 following data cleaning and SAIL linkage. This involved comparison of means to demonstrate any differences between time points. Presentation of the outcomes give the confidence interval of the difference between groups. The RECORD statement has been used to underpin the reporting of this data.

## Results

The ‘HAPPEN At Home’ survey had 1333 responses, from 161 primary schools across Wales. Following the exclusion process presented in Figure 1 (no consent for linkage, missing FSM data), the final linked data (‘HAPPEN At Home’ responses and FSM status) for subsequent analysis included 574 participants.

Data were stratified by FSM status and compared with 2019 from the same time period (March to June 2019). A breakdown of demographics by FSM status and time period is presented in Table 1.

Table 1 – Demographics

| Demographics |                   | March to June 2018 (n=475) | March to June 2019 (n=1150) | School closures 2020 (n=1068) | Difference (2019 – 2020) |
|--------------|-------------------|----------------------------|-----------------------------|-------------------------------|--------------------------|
| Gender       | Boy               | 233 (49.19%)               | 594 (51.65%)                | 535 (50.09%)                  | -1.56% (-.26 to 5.71)    |
|              | Girl              | 241 (50.65%)               | 548 (47.65%)                | 528 (49.44%)                  | 1.79% (-2.37 to 5.94)    |
|              | Prefer Not To Say | 1 (0.16%)                  | 8 (0.70%)                   | 5 (0.47%)                     | -.23% (-.04 to .09)      |
| Age          | Mean              | 10.30                      | 10.27                       | 9.99                          | -.28 (-.36 to -.19)      |
|              | 3                 | NA                         | NA                          | 92 (8.61%)                    | NA                       |
| Year Group   | 4                 | 69 (14.54%)                | 303 (26.35%)                | 373 (34.93%)                  | 8.58% (.47 to 12.39)     |
|              | 5                 | 233 (49.12%)               | 403 (35.04%)                | 283 (26.50%)                  | -8.54% (.47 to 12.34)    |
|              | 6                 | 173 (36.35%)               | 444 (38.61%)                | 320 (29.96%)                  | -8.65% (.47 to 12.55)    |

### *Differences in health outcomes before (2018-2019) and during school closures (2020)*

During school closures there was a significant improvement in physical activity (see Table 2) (4.5% increase in number achieving 60 minutes of physical activity a day (95%CI: 0.95% to 8.14%) and in sleep (10.39% more having the recommended 9 hours sleep). Children also report feeling less tired. There were no significant differences in these variables between 2018 and 2019 suggesting that these findings are associated with lockdown restrictions and school closures as opposed to time trends. Perceptions of general competency and feeling safe in your area (S1) also increased during school closures.

1  
2  
3 Regarding dietary and dental health behaviours, the amount of daily teeth brushing decreases annually  
4 (Table 2) but this is more significant between 2019 and 2020 (-14.92%, CI: -18.62 to -11.21).

5  
6 Interestingly the number of takeaways consumed per week has significantly decreased during 2020 (-  
7 20.29%, CI: -24.34 to -16.33) while sugary snack consumption has increased (15.03%, CI: 11.31 to  
8 18.74). However, there appears to be an annual trend in sugary snack consumption when compared to  
9 2019 and 2018 data. A higher proportion of children report eating breakfast during school closures  
10 compared to previous years.  
11  
12  
13  
14  
15  
16  
17  
18  
19  
20  
21  
22  
23  
24  
25  
26  
27  
28  
29  
30  
31  
32  
33  
34  
35  
36  
37  
38  
39  
40  
41  
42  
43  
44  
45  
46  
47  
48  
49  
50  
51  
52  
53  
54  
55  
56  
57  
58  
59  
60

For peer review only

Table 2 - Differences between those who took part in the HAH survey and those who have taken part in HAPPEN previously (group comparison between 2018, 2019 and 2020)

| H/WB Indicator          |                          | March – June<br>2018 (n=475) | March – June<br>2019 (n=1150) | School closures<br>(n=1068) | Difference<br>(2018 – 2019)      | Difference<br>(2019 – school closures) |
|-------------------------|--------------------------|------------------------------|-------------------------------|-----------------------------|----------------------------------|----------------------------------------|
| Physical                | Activity                 | 21.57%                       | 22.78%                        | 27.32%                      | 1.21% (-3.50 to 5.93)            | <b>4.54% (.93 to 8.14)</b>             |
| Activity &<br>Sedentary | Sedentary                | 27.94%                       | 33.22%                        | 56.61%                      | 5.28% (.01 to 10.53)             | <b>23.39% (19.37 to 27.43)</b>         |
| Sedentary               | Sleep                    | 84.31%                       | 80.43%                        | 90.82%                      | -3.88% (-8.27 to .51)            | <b>10.39% (7.48 to 13.29)</b>          |
| Behaviour               | Tired                    | 14.22%                       | 15.39%                        | 8.45%                       | 1.17% (-2.87 to 5.22)            | <b>-6.94% (-9.64 to -4.23)</b>         |
|                         | Concentrate              | 26.23%                       | 24.00%                        | 17.46%                      | -2.23% (-7.09 to 2.64)           | <b>-6.54% (-9.91 to -.31)</b>          |
|                         | General Competency       | 88.35%                       | 84.26%                        | 90.82%                      | <b>-4.09% (-7.86 to -.30)</b>    | <b>6.56% (3.81 to 9.31)</b>            |
|                         | Walk To Park*            | N/A                          | 88.81%                        | 94.37%                      | N/A                              | <b>5.56% (3.24 to 7.87)</b>            |
|                         | Safe in Area             | 77.21%                       | 69.65%                        | 75.44%                      | <b>-7.56% (-12.63 to -2.46)</b>  | <b>5.79% (2.07 to 9.51)</b>            |
| Diet & Dental<br>Health | Toothbrushing            | 83.82%                       | 78.87%                        | 63.95%                      | <b>-4.95% (-.45 to -9.45)</b>    | <b>-14.92% (-18.62 to -11.21)</b>      |
|                         | Breakfast                | 93.87%                       | 92.43%                        | 97.28%                      | -1.44% (-4.35 to 1.48)           | <b>4.85% (3.00 to 6.69)</b>            |
|                         | Fizzy Drink              | 4.17%                        | 7.22%                         | 5.35%                       | <b>3.05% (.28 to 5.81)</b>       | -1.87% (-3.89 to .16)                  |
|                         | Sugary Snack             | 16.18%                       | 21.30%                        | 36.33%                      | <b>5.12% (.61 to 9.64)</b>       | <b>15.03% (11.31 to 18.74)</b>         |
|                         | Takeaway                 | 45.10%                       | 54.09%                        | 33.80%                      | <b>8.99% (3.35 to 14.62)</b>     | <b>-20.29% (-24.34 to -16.22)</b>      |
|                         | Fruit/Veg                | 83.09%                       | 71.30%                        | 69.94%                      | <b>-11.79% (-16.68 to -6.88)</b> | -1.36% (-5.15 to 2.43)                 |
| Wellbeing               | Health Score             | 77.54%                       | 69.22%                        | 79.11%                      | <b>-8.32% (-13.14 to -3.50)</b>  | <b>9.89% (6.26 to 13.53)</b>           |
|                         | Family Score             | 90.04%                       | 88.09%                        | 94.47%                      | -1.95% (-5.35 to 1.44)           | <b>6.38% (4.03 to 8.74)</b>            |
|                         | Friends Score            | 86.86%                       | 81.82%                        | 81.83%                      | <b>-5.04% (-9.03 to -1.04)</b>   | 0.01% (-3.20 to 3.22)                  |
|                         | Appearance Score         | 69.07%                       | 58.52%                        | 75.18%                      | <b>-10.55% (-15.73 to -5.35)</b> | <b>16.66% (12.79 to 20.53)</b>         |
|                         | Life Score               | 81.99%                       | 74.43%                        | 87.07%                      | <b>-7.56% (-12.08 to -3.03)</b>  | <b>12.64% (9.38 to 15.90)</b>          |
|                         | Autonomy                 | 88.35%                       | 89.22%                        | 85.11%                      | 0.87% (-2.49 to 4.23)            | <b>-4.11% (-6.8 to -1.32)</b>          |
| Mental Health           | Emotional Difficulties   | 14.19%                       | 20.96%                        | 12.17%                      | <b>6.77% (2.56 to 10.95)</b>     | <b>-8.79% (-11.87 to -5.69)</b>        |
|                         | Behavioural Difficulties | 7.84%                        | 14.78%                        | 8.89%                       | <b>6.94% (3.37 to 10.50)</b>     | <b>-5.89% (-8.58 to -3.19)</b>         |
| School                  | School Score             | 58.05%                       | 53.91%                        | 58.14%                      | -4.14% (-9.47 to 11.94)          | <b>4.23% (.09 to 8.36)</b>             |
|                         | School Competency        | 89.62%                       | 85.13%                        | 80.99%                      | <b>-4.49% (-8.15 to -.82)</b>    | <b>-4.14% (-7.25 to -1.02)</b>         |

\*Question not included in HAPPEN in 2018 Survey  
\*\*Bold denotes significance

1  
2  
3  
4  
5  
6  
7  
8  
9  
10  
11  
12  
13  
14  
15  
16  
17  
18  
19  
20  
21  
22  
23  
24  
25  
26  
27  
28  
29  
30  
31  
32  
33  
34  
35  
36  
37  
38  
39  
40  
41  
42  
43  
44  
45  
46

Table 3 - Exploring any differences between those who took part in the HAH survey and those who have taken part in 2019 stratified by FSM

|                                         |                          | March – June 2019 |             | School closures 2020 |                                |                                   |                                  |
|-----------------------------------------|--------------------------|-------------------|-------------|----------------------|--------------------------------|-----------------------------------|----------------------------------|
| H/WB Indicator                          |                          | No FSM (n=520)    | FSM (n=120) | No FSM (n=384)       | FSM (n=53)                     | No FSM Difference                 | FSM Difference                   |
| Physical Activity & Sedentary Behaviour | Activity                 | 25.00%            | 23.33%      | 28.12%               | 15.09%                         | 3.12% (-2.69 to 8.94)             | -8.24% (-21.47 to 4.99)          |
|                                         | Sedentary                | 29.61%            | 42.50%      | 60.67%               | 58.49%                         | <b>31.06% (24.84 to 37.28)</b>    | 15.99% (-0.18 to 32.16)          |
|                                         | Sleep                    | 81.34%            | 75.83%      | 89.84%               | 83.01%                         | <b>8.50% (3.80 to 13.19)</b>      | 7.18% (-6.32 to 20.69)           |
|                                         | Tired                    | 14.03%            | 25.83%      | 9.11%                | 20.75%                         | <b>-4.92% (-9.19 to -0.64)</b>    | -5.08% (-19.09 to 8.94)          |
|                                         | Concentrate              | 26.15%            | 16.66%      | 16.66%               | 18.86%                         | <b>-9.49% (-14.93 to -4.03)</b>   | 2.20% (-10.19 to 14.59)          |
|                                         | General Competency       | 85.38%            | 78.33%      | 92.18%               | 90.56%                         | <b>6.80% (2.57 to 11.03)</b>      | 12.23% (-0.18 to 24.65)          |
|                                         | Walk To Park             | 87.23%            | 94.06%      | 94.01%               | 92.45%                         | <b>6.78% (2.85 to 10.70)</b>      | -1.61% (-9.66 to 6.43)           |
| Safe in Area                            | 72.11%                   | 54.16%            | 76.82%      | 62.26%               | 4.71% (-10.74 to 10.48)        | 8.10% (-8.08 to 24.27)            |                                  |
| Diet & Dental Health                    | Toothbrushing            | 83.46%            | 64.16%      | 63.80%               | 47.16%                         | <b>-19.65% (-25.22 to -14.08)</b> | <b>-17.00% (-32.89 to -1.09)</b> |
|                                         | Breakfast                | 94.03%            | 86.66%      | 97.65%               | 92.45%                         | <b>3.62% (0.90 to 6.32)</b>       | 5.79% (-4.64 to 16.22)           |
|                                         | Fizzy Drink              | 5.76%             | 13.33%      | 4.68%                | 7.54%                          | -1.08% (-4.04 to 1.88)            | -5.79% (-16.22 to 4.64)          |
|                                         | Sugary Snack             | 20.38%            | 18.33%      | 36.97%               | 32.07%                         | <b>16.59% (10.79 to 22.39)</b>    | <b>13.74% (0.21 to 27.26)</b>    |
|                                         | Takeaway                 | 54.23%            | 57.50%      | 34.89%               | 50.94%                         | <b>-19.34% (-25.80 to -12.86)</b> | -6.56% (-22.80 to 9.68)          |
| Fruit/Veg                               | 74.23%                   | 66.66%            | 68.75%      | 45.28%               | -5.48% (-11.41 to 0.45)        | <b>-21.38% (-37.08 to -5.67)</b>  |                                  |
| Wellbeing                               | Health Score             | 72.30%            | 60.83%      | 78.64%               | 66.03%                         | <b>6.34% (0.62 to 12.04)</b>      | 5.20% (-10.63 to 21.04)          |
|                                         | Family Score             | 89.03%            | 81.66%      | 94.01%               | 92.45%                         | <b>4.98% (1.23 to 8.71)</b>       | <b>10.79% (0.80 to 22.37)</b>    |
|                                         | Friends Score            | 83.07%            | 72.50%      | 83.33%               | 71.69%                         | 0.26% (-4.68 to 5.20)             | -0.81% (-15.46 to 13.85)         |
|                                         | Appearance Score         | 60.38%            | 45.83%      | 75.78%               | 66.03%                         | <b>15.40% (9.25 to 21.53)</b>     | <b>20.20% (4.13 to 36.27)</b>    |
|                                         | Life Score               | 74.80%            | 63.33%      | 89.32%               | 79.24%                         | <b>14.52% (9.41 to 19.61)</b>     | <b>15.91% (0.85 to 30.97)</b>    |
| Autonomy                                | 88.65%                   | 88.33%            | 85.41%      | 84.90%               | <b>-3.24% (-7.63 to 11.62)</b> | -3.43% (-14.32 to 7.46)           |                                  |
| Mental Health                           | Emotional Difficulties   | 18.65%            | 26.66%      | 10.93%               | 20.75%                         | <b>-7.72% (-12.45 to -2.97)</b>   | -5.91% (-20.03 to 8.21)          |
|                                         | Behavioural Difficulties | 14.42%            | 27.50%      | 6.77%                | 20.75%                         | <b>-7.65% (-11.78 to -3.51)</b>   | -6.75% (-20.96 to 7.47)          |
| School                                  | School Score             | 66.34%            | 61.66%      | 74.47%               | 56.60%                         | <b>8.13% (2.08 to 14.17)</b>      | -5.06% (-21.07 to 10.95)         |
|                                         | School Competency        | 86.34%            | 80.00%      | 79.42%               | 58.49%                         | <b>-6.92% (-11.81 to -2.02)</b>   | <b>-21.51% (-35.60 to -7.41)</b> |

\*Bold denotes significance

1  
2  
3 Between 2018 and 2019, wellbeing shows significant decreases in a number of areas including  
4 perceptions of health, friends, appearance and life. However, during school closures this trend  
5 reversed (table 2). Most notably children reported being happier with their health (9.89%, CI: 6.26 to  
6 13.53), appearance (16.66%, CI: 12.79 to 20.53) and life (12.64%, CI: 9.38 to 15.90). A similar trend  
7 is evident in terms of mental health (fewer emotional and behavioural difficulties) (table 2).  
8  
9  
10

11  
12 Despite being away from the school environment, children report feeling happier with school. Yet  
13 their self-reported school competency was reduced during school closures. However, there is an  
14 annual decrease since 2018 suggesting a temporal trend in pupils' perception of school ability.  
15  
16

17  
18  
19 *Differences in health outcomes before (2018-2019) and during school closures (2020) stratified by*  
20 *deprivation (FSM eligibility)*  
21  
22

23  
24 Compared to non-FSM children (Table 3), those eligible for FSM walked to the park less, their  
25 takeaway consumption showed less decline but their fruit and vegetable consumption significantly  
26 declined (-21.28%, CI: -37.08 to -5.67). This decline was not seen in non-FSM children. The decline  
27 in perceptions of school competency from 2019 to 2020 was three times higher within the FSM group.  
28  
29

30  
31 During school closures, there was a significant difference of reported daily physical activity between  
32 those on FSM and those not on FSM (13.03% difference, 95% CI: 3.3% to 21.66%). Compared to  
33 non-FSM children, a lower proportion of FSM eligible children reported to engage in at least 60  
34 minutes of daily physical activity during school closures (non-FSM: 28.12%; FSM: 15.09%).  
35 Children not on FSM showed a significant increase in sedentary time and reported a lower ability to  
36 concentrate. This was not a significant trend notices for those on FSM. However, there was an  
37 increase from 2019 to 2020 in family wellbeing scores for all children and especially among those  
38 eligible for FSM.  
39  
40  
41  
42  
43  
44  
45

## 46 **Discussion**

47  
48

49 Improvements during school closures for children included physical activity, sleep, wellbeing (family,  
50 health, life) and emotional and behavioural difficulties when considering the group as a whole.  
51 Primary school children also report higher wellbeing especially family score, during lockdown.  
52 However, aspects which were detrimental during school closures included less tooth brushing for all  
53 children. FSM children reported a reduction in the time spent engaged in physical activity,  
54 significantly less fruit and vegetable consumption and lower self-assessed school competence than  
55 before school closures.  
56  
57  
58  
59  
60

### *Physical activity and sedentary behaviour*

Overall, small improvements to time spent being physically active were seen during school closures. However, this increase is likely to be amongst non-FSM pupils. For those on FSM activity decreased and may be due to less access to safe areas to play compared to those not on FSM.

Recent research around school staff perceptions of the return to school echo this finding. Teachers perceived that their pupils had been less active during lockdown restrictions and observed upon the phased return to school that some children had gained weight<sup>21</sup>. Findings from the current study suggest this may be more pronounced for more deprived pupils. Those eligible for FSM felt less safe in their areas which may be why they were less active.

Non-FSM children were more active. However, non-FSM children's sedentary time was significantly higher during school closures. Their reported daily screen time (>2 hours) doubled compared to the previous year. The delivery of education during school closures was achieved primarily online through home learning and thus, children will have utilized screens (e.g., laptops and tablets) to aid learning. Less deprived families may have better access to these resources and therefore, screen time may be higher in this group. This is supported by research from the Institute for Fiscal Studies<sup>22</sup> where children from less deprived families were spending 30% more time engaging in home learning activities than those more deprived. This may also reflect why perceptions of school competency remains much higher in the less deprived group. This suggests that non-FSM children were more engaged with learning tasks and therefore had perceived higher competence and confidence with learning and development. This may contribute towards the estimated 46% increase in learning gap between disadvantaged children and their peers reported by teachers<sup>23</sup>. With the relationship between education and health well documented, this has implications for children's future health and wellbeing outcomes<sup>24</sup>. Further evidence of this is seen in feeling part of your school community which again is much higher in those not on FSM.

For those eligible for FSM, the amount of sedentary time may appear positive in comparison to non-FSM but could also highlight inequalities relating to digital poverty and contribute to gaps in learning progression. Previous HAPPEN research<sup>21</sup> has highlighted the lack of access to digital equipment, sharing devices and a lack of digital competency in accessing home learning. This is worth noting as while less screen time could be perceived as a benefit to physical health in FSM children, during school closures it could also mean that learning gaps are being widened.

Children not on FSM report to not being able to concentrate as much compared to the previous year. The increased sedentary time may be due to increased screen time/online working for non-FSM pupils

1  
2  
3 during school closures may have been detrimental to concentration. More research is needed into how  
4 screen time was consumed during school closures and the impact this has on health is required.  
5  
6

### 7 *Diet and dental health*

8  
9  
10  
11 Toothbrushing was significantly lower in children compared to 2019 regardless of FSM status. This  
12 meant many children were brushing their teeth less than the recommended guidelines of twice per  
13 day. Research shows that lack of routine and structure puts children at risk of poorer dental hygiene<sup>25</sup>  
14 which can have long-term impacts. It is possible that school closures disrupted bedtime and wake time  
15 routines in which teeth brushing would usually take place, and therefore may account for the lower  
16 frequency of teeth brushing. In addition, the lack of access to school-based dental hygiene  
17 programmes such as ‘Designed to Smile’<sup>26</sup> may have a significant impact on teeth brushing  
18 behaviour. This coupled with observed increases in sugary snack consumption through school  
19 closures may have a detrimental impact on dental hygiene.  
20  
21  
22  
23  
24  
25

26  
27 Those on FSM saw the biggest impact on dietary behaviours during lockdown restrictions. Not only  
28 was takeaway consumption higher in this group, but FSM children also consumed fewer fruit and  
29 vegetables during this time. FSM are a key public health policy to aid in reducing food insecurity and  
30 associated negative health and educational inequalities in the UK. It appears that those utilising FSM  
31 have been significantly impacted by school closures in not being able to access regular meal provision  
32 in a school setting in Wales. Research shows that almost half of all children on FSM were unable to  
33 access them during school closures<sup>27</sup>.  
34  
35  
36  
37  
38

39  
40 Providing children with nutritional meals in school helps to narrow health inequalities and the  
41 educational attainment gap between the most and least deprived children<sup>29,30</sup>. Findings from this study  
42 add further evidence to disparities amongst groups of children from different backgrounds. While the  
43 initial lockdown in March 2020 was temporary, the findings of the current study support the mounting  
44 evidence that prolonged lockdown periods will affect children’s physical health<sup>27</sup>.  
45  
46  
47  
48

### 49 *Wellbeing and mental health*

50  
51  
52 Within this current study, improvements in family wellbeing was observed during school closures for  
53 both groups of children. This is likely due to an increased number of parents working from home or  
54 being furloughed, enabling some children to spend extra time that they otherwise would not have had  
55 with caregivers. School staff acknowledge this, they reported children having more opportunities for  
56 walking, exploring and spending time outside, with this contributing to strengthened family  
57 relationships<sup>21</sup>.  
58  
59  
60



1  
2  
3 Happiness with life was also significantly higher generally and increased equally in both groups from  
4 2019 data. It is important to note that deprived children still report feeling less happy in general  
5 compared to non-FSM children. The findings regarding physical activity may underpin this, with  
6 increased opportunities to play and be outdoors, for example having more time during lockdown and  
7 feeling safer in their areas. Moreover, behavioural and emotional difficulties reported during school  
8 closures was significantly lower. In less deprived children, this number was almost half suggesting a  
9 more positive impact in those not on FSM. Interestingly, previous research has found the opposite,  
10 with parents and teachers reporting increases in emotional and behavioural difficulties as well as low  
11 mood, anxiety and social disconnection<sup>21,31</sup>. It is possible these conflicting findings highlight the  
12 difference between child reported and adult external observations.  
13  
14  
15  
16  
17  
18  
19

### 20 **Limitations**

21  
22  
23 Although the 'HAPPEN At Home' survey was made available to all children aged 8-11 across Wales,  
24 the findings of this paper only present those who participated in the survey and a subsample who  
25 consented to data linkage. As the survey took place at home due to school closures, those who  
26 participated will be from families who have internet access. The difference in inequalities are likely to  
27 be much higher among those who could not participate due to lack of access to the internet. While the  
28 sampling strategy was the same for 2020 and 2019, 2018 data was sampled more purposefully from  
29 South Wales which may have an influence on findings from this year.  
30  
31  
32  
33  
34  
35

36 There is evidence that FSM status is not a perfect measure of socio-economic deprivation<sup>32</sup> and there  
37 are also a number of other factors that contribute to the deprivation levels of a child. However, FSM  
38 status does come very close to identifying a group of children who may be at disadvantage due to  
39 their socio-economic position<sup>32</sup>.  
40  
41  
42  
43

### 44 **Conclusion**

45  
46  
47 Overall, findings from this study show that, as a group, many things improved during the period of  
48 school closures for children including physical activity, sleep and general wellbeing. However, there  
49 are significant differences and inequalities when stratified by FSM. Improvements were mostly  
50 observed in non-FSM children. For children eligible for FSM, diet (e.g. lower fruit and vegetable  
51 intake), physical activity and dental health was significantly impacted. These findings are concerning  
52 as they illustrate the importance of the entire school day, including free school meal provision, in  
53 attenuating physical health inequalities in children.  
54  
55  
56  
57  
58  
59  
60

1  
2  
3 This paper shows the short-term effect of school closures on children's health and wellbeing.  
4  
5 Furthermore, this research highlights a number of concerns regarding wider physical health  
6  
7 inequalities such as obesity. When schools reopen this research suggests there will be a need to  
8  
9 address wider physical health inequalities such as obesity, poor dental health, lack of vitamins and  
10  
11 minerals and lower fitness in those from deprived backgrounds.  
12  
13  
14  
15  
16  
17  
18  
19  
20  
21  
22  
23  
24  
25  
26  
27  
28  
29  
30  
31  
32  
33  
34  
35  
36  
37  
38  
39  
40  
41  
42  
43  
44  
45  
46  
47  
48  
49  
50  
51  
52  
53  
54  
55  
56  
57  
58  
59  
60

For peer review only

### *Contributorship statement*

MJ wrote the first draft of the paper and all authors provided critical input and revisions for all further drafts. MJ, EM and SB designed data collection and MJ and SB undertook data analysis. MJ, EM, SB, MD and JW aided in interpretation of findings and supervision of study quality. The authors thank key stakeholders from regional consortia and schools for their participation in the development in the 'HAPPEN At Home' survey. The corresponding author attests that all listed authors meet authorship criteria and that no others meeting the criteria have been omitted.

### *Declaration of Interests*

All authors declare no competing interest including no financial and personal relationships with other people or organisations that might have an interest in the submitted work and no other relationships or activities that could appear to have influenced the submitted work.

### *Role of Funding Source*

This work was supported by the National Centre for Population Health and Wellbeing Research (NCPHWR) funded by Health and Care Research Wales and Welsh Government. The funders had no further involvement other than providing financial support. No financial disclosures were reported by the authors of this paper.

The collaborations of the authors were made possible by the [GENIUS network](#). GENIUS is supported by the UK Prevention Research Partnership, an initiative funded by UK Research and Innovation Councils, the Department of Health and Social Care (England) and the UK devolved administrations, and leading health research charities.

### *Data Sharing Statement*

No additional data available.

### *Figure Permissions*

Usage rights have been obtained for all figures including those in the supplementary material.

## References

1. World Health Organisation (WHO). WHO announces COVID-19 outbreak a pandemic.
2. British Broadcasting Company (BBC). Coronavirus confirmed as pandemic by World Health Organization.
3. Viner RM, Russell SJ, Croker H, et al. School closure and management practices during coronavirus outbreaks including COVID-19: a rapid systematic review. *Lancet Child Adolesc Heal*. 2020;4(5):397-404. doi:10.1016/S2352-4642(20)30095-X
4. Van Lancker W, Parolin Z. COVID-19, school closures, and child poverty: a social crisis in the making. *Lancet Public Heal*. 2020;5(5):243-244. doi:10.1016/S2468-2667(20)30084-0
5. Wang G, Zhang Y, Zhao J, Zhang J, Jiang F. Mitigate the effects of home confinement on children during the COVID-19 outbreak. *Lancet*. 2020;395(10228):945-947. doi:10.1016/S0140-6736(20)30547-X
6. Brooks SK, Smith LE, Webster RK, et al. The impact of unplanned school closure on children's social contact: Rapid evidence review. *Eurosurveillance*. 2020;25(13). doi:10.2807/1560-7917.ES.2020.25.13.2000188
7. Liu JJ, Bao Y, Huang X, Shi J, Lu L. Mental health considerations for children quarantined because of COVID-19. *Lancet Child Adolesc Heal*. 2020;4(5):347-349. doi:10.1016/S2352-4642(20)30096-1
8. Lyons RA, Jones KH, John G, et al. BMC Medical Informatics and The SAIL databank : linking multiple health and social care datasets. 2009;8:1-8. doi:10.1186/1472-6947-9-3
9. World Health Organization (WHO). Considerations for school-related health measures in the context of COVID-19.
10. European Network of Ombudpersons for Children (ENOC) and United Nations International Children's Fund. Ombudpersons and Commissioners for Children's Challenges and Responses to Covid-19. <http://enoc.eu/wp-content/uploads/2020/06/ENOC-UNICEFF-COVID-19-survey-updated-synthesis-report-FV.pdf>. Published 2020.
11. United Nations Educational Scientific and Cultural Organisation (UNESCO). Adverse consequences of school closures. <https://en.unesco.org/covid19/educationresponse/consequences>. Published 2020.
12. European Centre for Disease Prevention and Control. COVID-19 in children and the role of school settings in COVID-19 transmission Key messages. 2020;(August).
13. Rundle AG, Park Y, Herbstman JB, Kinsey EW, Wang YC. COVID-19–Related School Closings and Risk of Weight Gain Among Children. *Obesity*. 2020;28(6):1008-1009. doi:10.1002/oby.22813
14. The DELVE Initiative. Balancing the Risks of Pupils Returning to Schools. DELVE Report No. 4. <https://rs-delve.github.io/reports/2020/07/24/balancing-the-risk-of-pupils-returning-to->

- schools.html. Published 2020. Accessed January 7, 2021.
15. Mamot M, Allen J, Goldblatt P, Herd E, Morrison J. Build Back Fairer: The COVID-19 Marmot Review. The Pandemic, Socioeconomic and Health Inequalities in England. *London Inst Heal Equity*. 2020.
  16. Todd C, Christian D, Davies H, et al. Headteachers' prior beliefs on child health and their engagement in school based health interventions: A qualitative study. *BMC Res Notes*. 2015;8(1):1-10. doi:10.1186/s13104-015-1091-2
  17. Todd C, Chistian D, Tyler R, Stratton G, Brophy S. Developing HAPPEN (Health and Attainment of Pupils involved in a Primary Education Network): working in partnership to improve child health and education. *Perspect Public Health*. 2016;136(3):115-116. doi:10.1177/1757913916638231
  18. Everson B, Mackintosh KA, McNarry MA, Todd C, Stratton G. Can Wearable Cameras be Used to Validate School-Aged Children's Lifestyle Behaviours? *Children*. 2019;6(2):20. doi:10.3390/children6020020
  19. Ilie S, Sutherland A, Vignoles A. Revisiting free school meal eligibility as a proxy for pupil socio-economic deprivation. *Br Educ Res J*. 2017;43(2):253-274. doi:10.1002/berj.3260
  20. Ford D V., Jones KH, Verplancke JP, et al. The SAIL Databank: Building a national architecture for e-health research and evaluation. *BMC Health Serv Res*. 2009;9:1-12. doi:10.1186/1472-6963-9-157
  21. Marchant E, Todd C, James M, et al. *Primary School Staff Reflections on School Closures Due to COVID-19 and Recommendations for the Future: A National Qualitative Survey*.; 2020. doi:https://doi.org/10.1101/2020.11.06.20227108
  22. Andrew A, Cattan S, Dias MC, et al. Learning during the lockdown: real-time data on children's experiences during home learning: IFS Briefing note BN288. Institute for Fiscal Studies.
  23. Sharp C, Nelson J, Lucas M, Julius J, McCrone T, Sims D. The challenges facing schools and pupils in September 2020. The National Foundation for Educational Research.
  24. Feinstein L, Sabates R, Anderson TM, Sorhaindo A, Hammond C. Measuring The Effects of Education on Health and Civic engagement. *Proc Copenhagen Symp*. 2006:171-354. <https://www.oecd.org/education/innovation-education/37425753.pdf>.
  25. Duijster D, Verrips GHW, Van Loveren C. The role of family functioning in childhood dental caries. *Community Dent Oral Epidemiol*. 2014;42(3):193-205. doi:10.1111/cdoe.12079
  26. NHS Wales. Designed To Smile. <https://www.designedtosmile.org/welcome-croeso/welcome/>. Published 2020. Accessed January 7, 2021.
  27. Parnham JC, Lavery AA, Majeed A, Vamos EP. Half of children entitled to free school meals did not have access to the scheme during COVID-19 lockdown in the UK. *Public Health*. 2020;187(March):161-164. doi:10.1016/j.puhe.2020.08.019

- 1  
2  
3 28. Ingram J, Maciejewski G, Hand CJ. Changes in Diet, Sleep, and Physical Activity Are  
4 Associated With Differences in Negative Mood During COVID-19 Lockdown. *Front Psychol.*  
5 2020;11(September). doi:10.3389/fpsyg.2020.588604  
6  
7  
8 29. Stewart CH, Dundas R, Leyland AH. The Scottish school leavers cohort: Linkage of education  
9 data to routinely collected records for mortality, hospital discharge and offspring birth  
10 characteristics. *BMJ Open.* 2017;7(7):1-18. doi:10.1136/bmjopen-2016-015027  
11  
12  
13 30. Shaw B, Baars S, Menzies L, Parameshwaran M, Allen R. Low income pupils' progress at  
14 secondary school. 2017;(February). [https://www.gov.uk/government/publications/low-income-](https://www.gov.uk/government/publications/low-income-pupils-progress-at-secondary-school)  
15 [pupils-progress-at-secondary-school.](https://www.gov.uk/government/publications/low-income-pupils-progress-at-secondary-school)  
16  
17  
18 31. Pearcey S, Shum A, Waite P, Patalay P, Creswell C. Changes in children and young people's  
19 emotional and behavioural difficulties through lockdown: The Co-SPACE Study.  
20 2020;(June):1-28.  
21  
22  
23 32. Taylor C. The Reliability of Free School Meal Eligibility as a Measure of Socio-Economic  
24 Disadvantage: Evidence from the Millennium Cohort Study in Wales. *Br J Educ Stud.*  
25 2018;66(1):29-51. doi:10.1080/00071005.2017.1330464  
26  
27  
28  
29  
30  
31  
32  
33  
34  
35  
36  
37  
38  
39  
40  
41  
42  
43  
44  
45  
46  
47  
48  
49  
50  
51  
52  
53  
54  
55  
56  
57  
58  
59  
60

Figure 1  
Study Flow Diagram

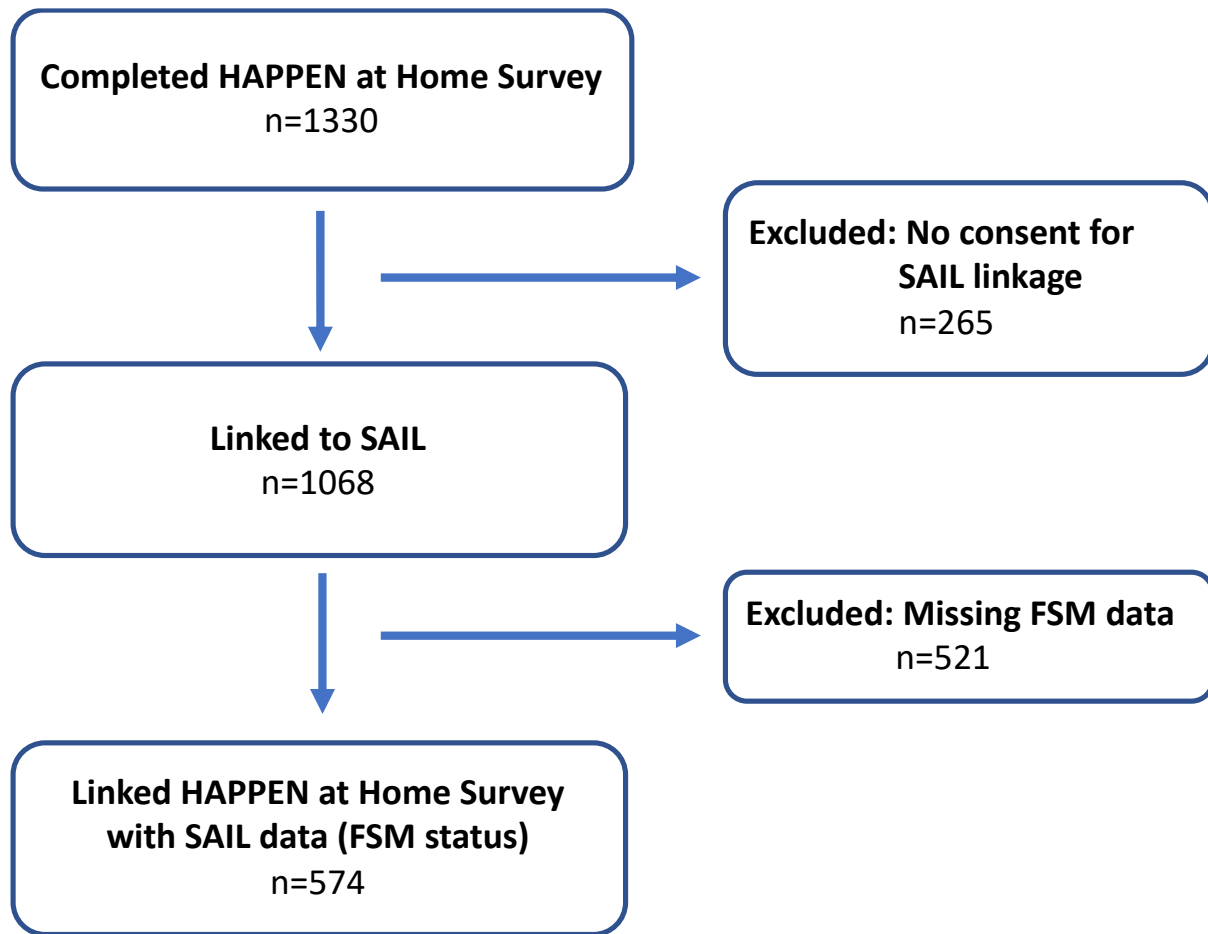

view only

1  
2  
3  
4  
5  
6  
7  
8  
9  
10  
11  
12  
13  
14  
15  
16  
17  
18  
19  
20  
21  
22  
23  
24  
25  
26  
27  
28  
29  
30  
31  
32  
33  
34  
35  
36  
37  
38  
39  
40  
41  
42  
43  
44  
45  
46  
47  
48  
49  
50  
51  
52  
53  
54  
55  
56  
57  
58  
59  
60

## S1 ITEMS INCLUDED IN THE ANALYSES

| Health and wellbeing topic                | Item within HAPPEN at Home Survey                                                                                                                                                                                                                                                                                                                                                                                                                                                                                                                                                                                                                                    |
|-------------------------------------------|----------------------------------------------------------------------------------------------------------------------------------------------------------------------------------------------------------------------------------------------------------------------------------------------------------------------------------------------------------------------------------------------------------------------------------------------------------------------------------------------------------------------------------------------------------------------------------------------------------------------------------------------------------------------|
| Physical activity and sedentary behaviour | <p><i>“In the last 7 days, how many days did you do sports or exercise for at least 1 hour in total. This includes doing any activities (including online activities like Joe Wicks) or playing sports where your heart beat faster, you breathed faster and you felt warmer?” (e.g. 5-6 days)</i></p> <p><i>“In the last 7 days, how many days did you watch TV/play online games/use the internet etc. for 2 or more hours a day (in total)?”</i></p> <p><i>“What time did you wake up TODAY (to the nearest half hour)?”</i></p> <p><i>“On a scale of 0 to 10 (0 being not very safe and 10 being very safe), how safe do you feel playing in your area?”</i></p> |
| Diet and dental health                    | <p><i>“How many times did you brush your teeth YESTERDAY?”</i></p> <p><i>“In the last 7 days, how many days did you drink at least one fizzy drink (e.g. coke, fanta, sprite)?”</i></p> <p><i>“Did you eat any fruit and vegetables YESTERDAY?”</i></p>                                                                                                                                                                                                                                                                                                                                                                                                              |
| Wellbeing                                 | <p><i>“On a scale of 0 to 10 (0 being very unhappy and 10 being very happy), how do you feel about:</i></p> <p><i>Your Health?</i></p> <p><i>Your Family?</i></p> <p><i>Your Friends?</i></p> <p><i>Your Appearance?</i></p> <p><i>Your Life?”</i></p> <p><i>*From the Good Childhood Index (2010) developed by the Children’s Society</i></p>                                                                                                                                                                                                                                                                                                                       |
| Mental health                             | <p><i>“Remember, there are no right or wrong answers, just pick which is right for you.</i></p> <p><i>I feel lonely.</i></p> <p><i>I cry a lot.</i></p> <p><i>I am unhappy”</i></p> <p><i>*From the Me and My Feelings Questionnaire</i></p>                                                                                                                                                                                                                                                                                                                                                                                                                         |
| School                                    | <p><i>“On a scale of 0 to 10 (0 being very unhappy and 10 being very happy), how do you feel about:</i></p> <p><i>Your School?”</i></p> <p><i>*From the Good Childhood Index (2010) developed by the Children’s Society</i></p>                                                                                                                                                                                                                                                                                                                                                                                                                                      |



1  
2  
3  
4  
5  
6  
7  
8  
9  
10  
11  
12  
13  
14  
15  
16  
17  
18  
19  
20  
21  
22  
23  
24  
25  
26  
27  
28  
29  
30  
31  
32  
33  
34  
35  
36  
37  
38  
39  
40  
41  
42  
43  
44  
45  
46  
47  
48  
49  
50  
51  
52  
53  
54  
55  
56  
57  
58  
59  
60

|  |                                                                                                                                                                                                           |
|--|-----------------------------------------------------------------------------------------------------------------------------------------------------------------------------------------------------------|
|  | <p><i>“Tell us if you agree or disagree with the following:</i></p> <p><i>I am doing well with my school work” (e.g. Strongly agree, agree, don’t agree or disagree, disagree, strongly disagree)</i></p> |
|--|-----------------------------------------------------------------------------------------------------------------------------------------------------------------------------------------------------------|

For peer review only

1  
2  
3 **S2**  
4 **THE 'HAPPEN AT HOME' SURVEY**  
5

6 Consent Form

7 Before you start please click this link to read the information sheet...  
8

9 <https://happen-wales.co.uk/childrens-information-sheet/>  
10

11 1. I have read the child information sheet and understand that if I take part I can change my mind at  
12 any time, and this will not be a problem at all. \*

13 *Mark only one oval.*  
14

- 15
- 16 • Yes
  - 17 • No
- 18  
19

20 2. I am happy for you to use my questionnaire for research. Only the researchers in the team will  
21 know my name and will not tell anyone else my answers \*

22 *Mark only one oval.*  
23

- 24
- 25 • Yes
  - 26 • No do not use my questionnaire
- 27  
28

29 3. I am happy for you to look at my school and health records to see how my school is doing (as a  
30 group). This is anonymous which means I cannot be identified \*

31 *Mark only one oval.*  
32

- 33
- 34 • Yes
  - 35 • No
- 36  
37

38 If you do not wish to take part in the questionnaire please do not continue.

39 Please click next to start the questionnaire!  
40  
41  
42  
43  
44  
45  
46  
47  
48  
49  
50  
51  
52  
53  
54  
55  
56  
57  
58  
59  
60

## ABOUT YOU

4. First Name\*

5. Last Name\*

6. Home Post Code\*

7. What school do you go to?\*

8. Are you still going to your school?\*

*Mark only one oval.*

- No, I am at home
- Yes, most days of the week
- Yes, sometimes
- I am in a different school from my own school

9. Do you have any other children living in your house with you (brothers, sisters) ?

*Mark only one oval.*

- Yes
- No

10. How many people live in your home with you (including adults)?

- 1
- 2
- 3
- 4
- 5
- 6+

11. What year are you in now?\*

*Mark only one oval.*

- Year 4
- Year 5
- Year 6

12. Gender\*

*Mark only one oval.*

- Boy
- Girl
- Prefer not to say

13. Date of Birth

Year\*

*Mark only one oval.*

- 2007
- 2008
- 2009

- 1  
2  
3 • 2010  
4 • 2011  
5 • 2012  
6  
7

8 14. Month\*

9 *Mark only one oval.*

- 10  
11 • January  
12 • February  
13 • March  
14 • April  
15 • May  
16 • June  
17 • July  
18 • August  
19 • September  
20 • October  
21 • November  
22 • December  
23  
24  
25

26 15. Day \*

27 *Mark only one oval.*

- 28  
29 • 1  
30 • 2  
31 • 3  
32 • 4  
33 • 5  
34 • 6  
35 • 7  
36 • 8  
37 • 9  
38 • 10  
39 • 11  
40 • 12  
41 • 13  
42 • 14  
43 • 15  
44 • 16  
45 • 17  
46 • 18  
47 • 19  
48 • 20  
49 • 21  
50 • 22  
51 • 23  
52 • 24  
53 • 25  
54 • 26  
55 • 27  
56 • 28  
57 • 29  
58 • 30  
59  
60

For peer review only

- 31

**YESTERDAY**

16. What did you eat for breakfast YESTERDAY?

*Check all that apply.*

- Nothing
- Cereal like cocopops, frosties, sugar puffs, chocolate cereals
- Healthy cereal like e.g. porridge, weetabix, readybrek, muesli, branflakes, cornflakes
- Snacks like biscuits
- Fruit
- Toast
- Cooked breakfast
- Yoghurt
- Other:

17. Did you eat any fruit and veg YESTERDAY?

*Mark only one oval.*

- No
- 1 piece
- 2 or more fruit and veg

18. How many times did you brush your teeth YESTERDAY?

*Mark only one oval.*

- 0
- 1
- 2
- 3

19. What time did you fall asleep YESTERDAY (to the nearest half hour)?

*Mark only one oval.*

- 6.00pm
- 6.30pm
- 7:00pm
- 7:30pm
- 8:00pm
- 8:30pm
- 9:00pm
- 9:30pm
- 10:00pm
- 10:30pm
- 11:00pm
- 11:30pm
- 12:00am
- 12:30am
- 1:00am
- 1:30am
- 2:00am
- 3:00am
- 3:30am
- 4:00am

1  
2  
3 20. What time did you wake up TODAY (to the nearest half hour)?

4 *Mark only one oval.*

- 5  
6 • 5:00am  
7 • 5:30am  
8 • 6:00am  
9 • 6:30am  
10 • 7:00am  
11 • 7:30am  
12 • 8:00am  
13 • 8:30am  
14 • 9:00am  
15 • 9:30am  
16 • 10:00am  
17 • 10:30am  
18 • 11:00am  
19 • 11:30am  
20  
21

22 THE LAST WEEK

23 NOW think about what you did in the last 7 days...

24  
25 21. In the last 7 days, how many days did you do sports or exercise for at least 1 hour in total. This  
26 includes doing any activities (including online activities like Joe Wicks) or playing sports where your  
27 heart beat faster, you breathed faster, and you felt warmer?

28 *Mark only one oval.*

- 29  
30 • 0 days  
31 • 1-2 days  
32 • 3-4 days  
33 • 5-6 days  
34 • 7 days  
35  
36

37 22. In the last 7 days, how many days did you watch TV/play online games/use the internet etc. for 2  
38 or more hours a day (in total)?

39 *Mark only one oval.*

- 40  
41 • 0 days  
42 • 1-2 day  
43 • 3-4 days  
44 • 5-6 days  
45 • 7 days  
46  
47

48 23. In the last 7 days, how many days did you feel tired?

49 *Mark only one oval.*

- 50  
51 • 0 days  
52 • 1-2 days  
53 • 3-4 days  
54 • 5-6 days  
55 • 7 days  
56

57 24. In the last 7 days, how many days did you feel like you could concentrate/pay attention well on  
58 your schoolwork?

59 *Mark only one oval.*

- 0 days
- 1-2 days
- 3-4 days
- 5-6 days
- 7 days
- Don't do school work

25. In the last 7 days, how many days did you drink at least one fizzy drink (e.g. coke, fanta, sprite)  
*Mark only one oval.*

- 0 days
- 1-2 days
- 3-4 days
- 5-6 days
- 7 days

26. In the last 7 days, how many days did you eat at least one sugary snack (e.g. chocolate bar, sweets)

*Mark only one oval.*

- 0 days
- 1-2 days
- 3-4 days
- 5-6 days
- 7 days

27. In the last 7 days, how many days did you eat take away foods (e.g. Chinese takeaway)

*Mark only one oval.*

- 0 days
- 1-2 days
- 3-4 days
- 5-6 days
- 7 days

#### ACTIVITY AND YOUR AREA

28. On a scale of 0 to 10 (0 being not very safe and 10 being very safe), how safe do you feel playing in your area?

*Mark only one oval.*

- 0
- 1
- 2
- 3
- 4
- 5
- 6
- 7
- 8
- 9
- 10

29. From your house, can you easily walk to a park (for example a field, grassy area)?

1  
2  
3 *Mark only one oval.*  
4

- 5 • Yes
- 6 • No
- 7

8 30. From your house, can you easily walk to somewhere you can play?  
9

10 *Mark only one oval.*

- 11 • Yes
- 12 • No
- 13

14 31. Do you have a garden?  
15

- 16 • Yes
- 17 • No
- 18

19 32. How often do you go out to play outside?  
20

21 *Mark only one oval.*

- 22 • Most days
- 23 • A few days each week
- 24 • Hardly ever
- 25 • I don't play
- 26
- 27

28 33. Do you have enough time for play?  
29

30 *Mark only one oval.*

- 31 • Yes, I have loads
- 32 • Yes, it's just about enough
- 33 • No, I would like to have a bit more
- 34 • No, I need a lot more
- 35
- 36

37 34. What type of places do you play in?  
38

- 39 • In my house
- 40 • In my garden
- 41 • In the street
- 42 • On a local grassy area
- 43 • In a place with bushes, trees and flowers
- 44 • In the woods near my house
- 45 • On a football field near my house
- 46 • In my school playground
- 47 • Somewhere with water or sand in it
- 48 • On the bike or skate park
- 49 • Somewhere else:
- 50
- 51

52 35. Can you play in all the places you would like to?  
53

- 54 • I can play in all the places I would like to
- 55 • I can play in some of the places I would like to
- 56 • I can only play in a few places I would like to
- 57 • I can hardly play in any of the places I would like to
- 58
- 59



1  
2  
3 36. Do you have somewhere at home where you have space to relax  
4

- 5
- 6 • Yes
  - 7 • Sometimes but not all the time
  - 8 • No

9  
10 YOU AND YOUR FEELINGS

11 This part of the survey is going to ask you how you feel. There are no right or wrong answers. You  
12 should just pick the answer which is best for you.

13  
14  
15 37. Tell us if you agree or disagree with the following:

16 *Mark only one oval per row.*

17  
18 I am doing well with my schoolwork

- 19
- 20 • Strongly agree
  - 21 • Agree
  - 22 • Don't agree or disagree
  - 23 • Disagree
  - 24 • Strongly disagree
  - 25 • I don't know
- 26  
27
- 28 • I feel part of my school community Strongly agree
  - 29 • Agree
  - 30 • Don't agree or disagree
  - 31 • Disagree
  - 32 • Strongly disagree
  - 33 • I don't know

34  
35  
36  
37 I have lots of choice over things that are important to me

- 38
- 39 • Strongly agree
  - 40 • Agree
  - 41 • Don't agree or disagree
  - 42 • Disagree
  - 43 • Strongly disagree

44  
45 There are lots of things I'm good at

- 46
- 47 • Strongly agree
  - 48 • Agree
  - 49 • Don't agree or disagree
  - 50 • Disagree
  - 51 • Strongly disagree

52  
53  
54 38. On a scale of 0 to 10 (0 being very unhappy and 10 being very happy), how do you feel about  
55 \*Based on the Good Childhood Index by the Children's Society

56  
57 39. Your Health

58 *Mark only one oval.*

- 59
- 60 • 0

- 1
- 2
- 3 • 1
- 4 • 2
- 5 • 3
- 6 • 4
- 7 • 5
- 8 • 6
- 9 • 7
- 10 • 8
- 11 • 9
- 12 • 10
- 13

14  
15 **40. Your Family**

16 *Mark only one oval.*

- 17
- 18 • 0
- 19 • 1
- 20 • 2
- 21 • 3
- 22 • 4
- 23 • 5
- 24 • 6
- 25 • 7
- 26 • 8
- 27 • 9
- 28 • 10
- 29

30  
31  
32 **41. Your Friends**

33 *Mark only one oval.*

- 34
- 35 • 0
- 36 • 1
- 37 • 2
- 38 • 3
- 39 • 4
- 40 • 5
- 41 • 6
- 42 • 7
- 43 • 8
- 44 • 9
- 45 • 10
- 46

47 **42. Your Appearance (how you look)**

48 *Mark only one oval.*

- 49
- 50
- 51 • 0
- 52 • 1
- 53 • 2
- 54 • 3
- 55 • 4
- 56 • 5
- 57 • 6
- 58 • 7
- 59 • 8
- 60 • 9

- 1  
2  
3 • 10  
4  
5

6 43. Your Life

7 *Mark only one oval.*

- 8  
9 • 0  
10 • 1  
11 • 2  
12 • 3  
13 • 4  
14 • 5  
15 • 6  
16 • 7  
17 • 8  
18 • 9  
19 • 10  
20  
21  
22

23 ME AND MY FEELINGS

24 Based on the Me and My Feelings Questionnaire ( Deighton, Tymms, Vostanis, Belsky, Fonagy,  
25 Brown, Martin, Patalay, & Wolpert, 2012)

26  
27 44. Remember, there are no right or wrong answers, just pick which is right for you.

28 *Mark only one oval per row.*

29  
30 I feel lonely

- 31  
32 • Never  
33 • Sometimes  
34 • Always  
35  
36

37 I cry a lot

- 38  
39 • Never  
40 • Sometimes  
41 • Always  
42

43 I am unhappy

- 44  
45 • Never  
46 • Sometimes  
47 • Always  
48

49 I feel nobody likes me

- 50  
51 • Never  
52 • Sometimes  
53 • Always  
54

55 I worry a lot

- 56  
57 • Never  
58 • Sometimes  
59 • Always  
60

1  
2  
3  
4 I have problems sleeping  
5

- 6 • Never
- 7 • Sometimes
- 8 • Always
- 9

10 I wake up in the night  
11

- 12 • Never
- 13 • Sometimes
- 14 • Always
- 15

16 I am shy  
17

- 18 • Never
- 19 • Sometimes
- 20 • Always
- 21

22 I feel scared  
23

- 24 • Never
- 25 • Sometimes
- 26 • Always
- 27

28 I worry when I am at school  
29

- 30 • Never
- 31 • Sometimes
- 32 • Always
- 33

34 I get very angry  
35

- 36 • Never
- 37 • Sometimes
- 38 • Always
- 39

40 I lose my temper  
41

- 42 • Never
- 43 • Sometimes
- 44 • Always
- 45

46 I hit out when I am angry  
47

- 48 • Never
- 49 • Sometimes
- 50 • Always
- 51

52 I do things to hurt people  
53

- 54 • Never
- 55 • Sometimes
- 56 • Always
- 57

1  
2  
3 I am calm  
4

- 5 • Never
- 6 • Sometimes
- 7 • Always
- 8

9  
10 I break things on purpose

- 11 • Never
- 12 • Sometimes
- 13 • Always
- 14

15  
16 45. Are you able to keep in touch with your family that you don't live with?

17 *Mark only one oval.*

- 18 • Yes
- 19 • No
- 20

21  
22 46. Are you able to keep in touch with your friends?

23 *Mark only one oval.*

- 24 • Yes
- 25 • No
- 26

27  
28 47. If yes, how are you keeping in touch (tick all that are relevant)?

- 29 • Live near them so I can see them (at a social distance)
- 30 • By phone (texting, calling or video calling)
- 31 • On social media
- 32 • On games consoles
- 33
- 34
- 35

36  
37 SUBMIT

38  
39 Don't forget to press submit below! Once you've pressed submit you are all done!

40  
41 If you'd like some additional resources while you're at home during COVID-19, we've put together  
42 some here:

43 <https://happen-wales.co.uk/some-resources-for-you/>  
44  
45  
46  
47  
48  
49  
50  
51  
52  
53  
54  
55  
56  
57  
58  
59  
60

1  
2  
3 **S3**  
4 **THE HAPPEN SURVEY**  
5

6 Consent Form

7 Before you start please click this link to read the information sheet...  
8

9 <https://happen-wales.co.uk/childrens-information-sheet/>  
10

11 1. I have read the child information sheet and understand that if I take part I can change my mind at  
12 any time, and this will not be a problem at all. \*

13 *Mark only one oval.*  
14

- 15
- 16 • Yes
  - 17 • No
- 18  
19

20 2. I am happy for you to use my questionnaire for research. Only the researchers in the team will  
21 know my name and will not tell anyone else my answers \*

22 *Mark only one oval.*  
23

- 24
- 25 • Yes
  - 26 • No do not use my questionnaire
- 27  
28

29 3. I am happy for you to look at my school and health records to see how my school is doing (as a  
30 group). This is anonymous which means I cannot be identified \*

31 *Mark only one oval.*  
32

- 33
- 34 • Yes
  - 35 • No
- 36  
37

38 If you do not wish to take part in the questionnaire please do not continue.

39 Please click next to start the questionnaire!  
40  
41  
42  
43  
44  
45  
46  
47  
48  
49  
50  
51  
52  
53  
54  
55  
56  
57  
58  
59  
60

1  
2  
3 ABOUT YOU4  
5 4. First Name\*6  
7 5. Last Name\*8  
9 6. Home Post Code\*10  
11 7. What school do you go to?\*12  
13 8. Do you have any other children living in your house with you (brothers, sisters)?14  
15 *Mark only one oval.*

- 16
- 
- 17
- 18 • Yes
  - 19 • No

20  
21 9. What year are you in now?\*22  
23 *Mark only one oval.*

- 24
- 25 • Year 4
  - 26 • Year 5
  - 27 • Year 6

28  
29 10. Do you have a garden?\*

- 30
- 31 • Yes
  - 32 • No

33  
34 11. Gender\*35  
36 *Mark only one oval.*

- 37
- 38 • Boy
  - 39 • Girl
  - 40 • Prefer not to say

41  
42 12. Date of Birth43  
44 Year\*45  
46 *Mark only one oval.*

- 47
- 48 • 2007
  - 49 • 2008
  - 50 • 2009
  - 51 • 2010
  - 52 • 2011
  - 53 • 2012

54  
55 13. Month\*56  
57 *Mark only one oval.*

- 58
- 59 • January
  - 60 • February
  - March
  - April
  - May
  - June

- July
- August
- September
- October
- November
- December

14. Day \*  
*Mark only one oval.*

- 1
- 2
- 3
- 4
- 5
- 6
- 7
- 8
- 9
- 10
- 11
- 12
- 13
- 14
- 15
- 16
- 17
- 18
- 19
- 20
- 21
- 22
- 23
- 24
- 25
- 26
- 27
- 28
- 29
- 30
- 31

YESTERDAY

15. How did you get to school yesterday?\*

- On the bus
- On bike
- In the car/taxi
- Walked
- Ran/jogged
- Scooter
- Skateboarded/Rollerbladed

16. What did you have to eat for lunch yesterday?\*



- School dinner
- Packed lunch from home
- Nothing

17. What did you do for most of your breaktimes yesterday?\*

- Sat around inside or outside
- Ran around
- Stood around
- Walked around

18. How many friends did you play with yesterday?\*

- I like to play on my own
- 1-2
- 3-4
- 5 or more

19. Did you have an afternoon break yesterday?\*

- Yes
- No

20. How did you get home yesterday?\*

- On the bus
- On bike
- In the car/taxi
- Walked
- Ran/jogged
- Scooter
- Skateboarded/Rollerbladed

#### AFTER SCHOOL

21. How many portions of fruit and vegetables did you eat yesterday?\*

- 1
- 2
- 3
- 4
- 5
- 6
- 7
- 8

22. How many times did you brush your teeth yesterday?\*

- 0
- 1
- 2

- 3

23. What time did you fall asleep YESTERDAY (to the nearest half hour)?

*Mark only one oval.*

- 6.00pm
- 6.30pm
- 7:00pm
- 7:30pm
- 8:00pm
- 8:30pm
- 9:00pm
- 9:30pm
- 10:00pm
- 10:30pm
- 11:00pm
- 11:30pm
- 12:00am
- 12:30am
- 1:00am
- 1:30am
- 2:00am
- 3:00am
- 3:30am
- 4:00am

24. What time did you wake up TODAY (to the nearest half hour)?

*Mark only one oval.*

- 5:00am
- 5:30am
- 6:00am
- 6:30am
- 7:00am
- 7:30am
- 8:00am
- 8:30am
- 9:00am
- 9.30am
- 10.00am
- 10.30am
- 11.00am
- 11.30am

#### THE LAST WEEK

25. In the last 7 days, how many days did you do sports or exercise for at least 1 hour in total. This includes doing any activities (this includes any activities or playing sports where your heart beat faster, you breathed faster, and you felt warmer?)

*Mark only one oval.*

- 0 days
- 1-2 days
- 3-4 days
- 5-6 days

- 7 days

26. In the last 7 days, how many days did you watch TV/play online games/use the internet etc. for 2 or more hours a day (in total)?

*Mark only one oval.*

- 0 days
- 1-2 day
- 3-4 days
- 5-6 days
- 7 days

27. In the last 7 days, how many days did you feel tired?

*Mark only one oval.*

- 0 days
- 1-2 days
- 3-4 days
- 5-6 days
- 7 days

28. In the last 7 days, how many days did you feel like you could concentrate/pay attention well on your schoolwork?

*Mark only one oval.*

- 0 days
- 1-2 days
- 3-4 days
- 5-6 days
- 7 days
- Don't do school work

29. In the last 7 days, how many days did you drink at least one fizzy drink (e.g. coke, fanta, sprite)

*Mark only one oval.*

- 0 days
- 1-2 days
- 3-4 days
- 5-6 days
- 7 days

30. In the last 7 days, how many days did you eat at least one sugary snack (e.g. chocolate bar, sweets)

*Mark only one oval.*

- 0 days
- 1-2 days
- 3-4 days
- 5-6 days
- 7 days

31. In the last 7 days, how many days did you eat take away foods (e.g. Chinese takeaway)

*Mark only one oval.*

- 0 days

- 1-2 days
- 3-4 days
- 5-6 days
- 7 days

## SPORT AND ACTIVITY

32. These questions are going to ask you how you feel about physical activity (This includes any activity where your heart beats faster, you breathe faster and you feel warmer)

- I want to take part in physical activity
- I feel confident to take part in lots of different physical activities
- I am good at lots of different physical activities
- I understand why taking part in physical activity is good for me

32. How many times do you take part in sports club outside of school a week?

- 0
- 1
- 2
- 3
- 4
- 5
- 6
- 7
- 8
- 9
- 10

33. Can you ride a bike without stabilisers?

- Yes
- No

34. Can you swim 25 metres without a float or armbands? (This is 1 length in a standard swimming pool)

- Yes
- No

## YOU AND YOUR FEELINGS

35. Tell us if you agree or disagree with the following:

- I am doing well at school
- I feel part of my school community
- I have lots of choice over things that are important to me
- There are lots of things I'm good at

36. On a scale of 0 to 10 (0 being very unhappy and 10 being very happy), how do you feel about  
\*Based on the Good Childhood Index by the Children's Society

37. Your Health

*Mark only one oval.*

1  
2  
3  
4  
5  
6  
7  
8  
9  
10  
11  
12  
13  
14  
15  
16  
17  
18  
19  
20  
21  
22  
23  
24  
25  
26  
27  
28  
29  
30  
31  
32  
33  
34  
35  
36  
37  
38  
39  
40  
41  
42  
43  
44  
45  
46  
47  
48  
49  
50  
51  
52  
53  
54  
55  
56  
57  
58  
59  
60

- 0
- 1
- 2
- 3
- 4
- 5
- 6
- 7
- 8
- 9
- 10

38. Your School  
*Mark only one oval.*

- 0
- 1
- 2
- 3
- 4
- 5
- 6
- 7
- 8
- 9
- 10

38. Your Family  
*Mark only one oval.*

- 0
- 1
- 2
- 3
- 4
- 5
- 6
- 7
- 8
- 9
- 10

39. Your Friends  
*Mark only one oval.*

- 0
- 1
- 2
- 3
- 4
- 5
- 6
- 7
- 8
- 9

For peer review only

- 10

#### 40. Your Appearance

*Mark only one oval.*

- 0
- 1
- 2
- 3
- 4
- 5
- 6
- 7
- 8
- 9
- 10

#### 41. Your Life

*Mark only one oval.*

- 0
- 1
- 2
- 3
- 4
- 5
- 6
- 7
- 8
- 9
- 10

### YOU AND YOUR FEELINGS

This part of the survey is going to ask you how you feel. There are no right or wrong answers. You should just pick the answer which is best for you.

Based on the Me and My Feelings Questionnaire (Deighton, Tymms, Vostanis, Belsky, Fonagy, Brown, Martin, Patalay, & Wolpert, 2012)

42. Remember, there are no right or wrong answers, just pick which is right for you.

*Mark only one oval per row.*

I feel lonely

- Never
- Sometimes
- Always

I cry a lot

- Never
- Sometimes
- Always

1  
2  
3 I am unhappy  
4

- 5 • Never
- 6 • Sometimes
- 7 • Always

8  
9 I feel nobody likes me  
10

- 11 • Never
- 12 • Sometimes
- 13 • Always

14  
15 I worry a lot  
16

- 17 • Never
- 18 • Sometimes
- 19 • Always

20  
21 I have problems sleeping  
22

- 23 • Never
- 24 • Sometimes
- 25 • Always

26  
27 I wake up in the night  
28

- 29 • Never
- 30 • Sometimes
- 31 • Always

32  
33 I am shy  
34

- 35 • Never
- 36 • Sometimes
- 37 • Always

38  
39 I feel scared  
40

- 41 • Never
- 42 • Sometimes
- 43 • Always

44  
45 I worry when I am at school  
46

- 47 • Never
- 48 • Sometimes
- 49 • Always

50  
51 I get very angry  
52

- 53 • Never
- 54 • Sometimes
- 55 • Always

56  
57 I lose my temper  
58  
59  
60

- Never
- Sometimes
- Always

I hit out when I am angry

- Never
- Sometimes
- Always

I do things to hurt people

- Never
- Sometimes
- Always

I am calm

- Never
- Sometimes
- Always

I break things on purpose

- Never
- Sometimes
- Always

YOUR LOCAL AREA

43. On a scale of 0 to 10 (0 being not very safe and 10 being very safe), how safe do you feel playing in your area?

*Mark only one oval.*

- 0
- 1
- 2
- 3
- 4
- 5
- 6
- 7
- 8
- 9
- 10

44. From your house, can you easily walk to school?

*Mark only one oval.*

- Yes
- No

45. From your house, can you easily walk to a park (for example a field, grassy area)?



1  
2  
3 *Mark only one oval.*  
4

- 5 • Yes
- 6 • No
- 7

8 45. From your house, can you easily walk to a leisure centre/sports centre?  
9

10 *Mark only one oval.*

- 11 • Yes
- 12 • No
- 13

14 46. Can you play in all the places you would like to?  
15

- 16 • I can play in all the places I would like to
- 17 • I can play in some of the places I would like to
- 18 • I can only play in a few places I would like to
- 19 • I can hardly play in any of the places I would like to
- 20
- 21

22 47. Are you happy with the area that you live in?  
23

- 24 • Yes
- 25 • No
- 26

27 48. If you could change something to make you and your friends healthier and happier, what would  
28 you change... IN SCHOOL?  
29

30 49. If you could change something to make you and your friends healthier and happier, what would  
31 you change... OUT OF SCHOOL?  
32

33 Don't forget to press submit below!  
34

35 We have some resources on our website if you would like to learn more or would like to speak to  
36 someone... <https://happen-wales.co.uk/some-resources-for-you/> (<https://happen-wales.co.uk/some-resources-for-you/>)  
37  
38  
39  
40  
41  
42  
43  
44  
45  
46  
47  
48  
49  
50  
51  
52  
53  
54  
55  
56  
57  
58  
59  
60

**The RECORD statement – checklist of items, extended from the STROBE statement, that should be reported in observational studies using routinely collected health data.**

|                           | Item No. | STROBE items                                                                                                                                                                               | Location in manuscript where items are reported | RECORD items                                                                                                                                                                                                                                                                                                                                                                                                                                | Location in manuscript where items are reported |
|---------------------------|----------|--------------------------------------------------------------------------------------------------------------------------------------------------------------------------------------------|-------------------------------------------------|---------------------------------------------------------------------------------------------------------------------------------------------------------------------------------------------------------------------------------------------------------------------------------------------------------------------------------------------------------------------------------------------------------------------------------------------|-------------------------------------------------|
| <b>Title and abstract</b> |          |                                                                                                                                                                                            |                                                 |                                                                                                                                                                                                                                                                                                                                                                                                                                             |                                                 |
|                           | 1        | (a) Indicate the study's design with a commonly used term in the title or the abstract (b) Provide in the abstract an informative and balanced summary of what was done and what was found | a) P1<br>b) P2                                  | RECORD 1.1: The type of data used should be specified in the title or abstract. When possible, the name of the databases used should be included.<br><br>RECORD 1.2: If applicable, the geographic region and timeframe within which the study took place should be reported in the title or abstract.<br><br>RECORD 1.3: If linkage between databases was conducted for the study, this should be clearly stated in the title or abstract. | 1.1) P1<br>1.2) P1/2<br>1.3) P1/2               |
| <b>Introduction</b>       |          |                                                                                                                                                                                            |                                                 |                                                                                                                                                                                                                                                                                                                                                                                                                                             |                                                 |
| Background rationale      | 2        | Explain the scientific background and rationale for the investigation being reported                                                                                                       | P3                                              |                                                                                                                                                                                                                                                                                                                                                                                                                                             |                                                 |
| Objectives                | 3        | State specific objectives, including any prespecified hypotheses                                                                                                                           | P3                                              |                                                                                                                                                                                                                                                                                                                                                                                                                                             |                                                 |
| <b>Methods</b>            |          |                                                                                                                                                                                            |                                                 |                                                                                                                                                                                                                                                                                                                                                                                                                                             |                                                 |
| Study Design              | 4        | Present key elements of study design early in the paper                                                                                                                                    | P3                                              |                                                                                                                                                                                                                                                                                                                                                                                                                                             |                                                 |
| Setting                   | 5        | Describe the setting, locations, and relevant dates, including periods of recruitment, exposure, follow-up, and data collection                                                            | P5                                              |                                                                                                                                                                                                                                                                                                                                                                                                                                             |                                                 |

|                                                                                                                                                       |                              |   |                                                                                                                                                                                                                                                                                                                                                                                                                                                                                                                                                                                                                                                                                                                              |                           |                                                                                                                                                                                                                                                                                                                                                                                                                                                                                                                                                                                                                                                                                                      |                                                       |
|-------------------------------------------------------------------------------------------------------------------------------------------------------|------------------------------|---|------------------------------------------------------------------------------------------------------------------------------------------------------------------------------------------------------------------------------------------------------------------------------------------------------------------------------------------------------------------------------------------------------------------------------------------------------------------------------------------------------------------------------------------------------------------------------------------------------------------------------------------------------------------------------------------------------------------------------|---------------------------|------------------------------------------------------------------------------------------------------------------------------------------------------------------------------------------------------------------------------------------------------------------------------------------------------------------------------------------------------------------------------------------------------------------------------------------------------------------------------------------------------------------------------------------------------------------------------------------------------------------------------------------------------------------------------------------------------|-------------------------------------------------------|
| 1<br>2<br>3<br>4<br>5<br>6<br>7<br>8<br>9<br>10<br>11<br>12<br>13<br>14<br>15<br>16<br>17<br>18<br>19<br>20<br>21<br>22<br>23<br>24<br>25<br>26<br>27 | Participants                 | 6 | <p>(a) <i>Cohort study</i> - Give the eligibility criteria, and the sources and methods of selection of participants. Describe methods of follow-up</p> <p><i>Case-control study</i> - Give the eligibility criteria, and the sources and methods of case ascertainment and control selection. Give the rationale for the choice of cases and controls</p> <p><i>Cross-sectional study</i> - Give the eligibility criteria, and the sources and methods of selection of participants</p> <p>(b) <i>Cohort study</i> - For matched studies, give matching criteria and number of exposed and unexposed</p> <p><i>Case-control study</i> - For matched studies, give matching criteria and the number of controls per case</p> | <p>a) P5</p> <p>b) P6</p> | <p>RECORD 6.1: The methods of study population selection (such as codes or algorithms used to identify subjects) should be listed in detail. If this is not possible, an explanation should be provided.</p> <p>RECORD 6.2: Any validation studies of the codes or algorithms used to select the population should be referenced. If validation was conducted for this study and not published elsewhere, detailed methods and results should be provided.</p> <p>RECORD 6.3: If the study involved linkage of databases, consider use of a flow diagram or other graphical display to demonstrate the data linkage process, including the number of individuals with linked data at each stage.</p> | <p>6.1) P6</p> <p>6.2) NA</p> <p>6.3) P6/Figure 1</p> |
| 28<br>29<br>30<br>31<br>32<br>33<br>34                                                                                                                | Variables                    | 7 | Clearly define all outcomes, exposures, predictors, potential confounders, and effect modifiers. Give diagnostic criteria, if applicable.                                                                                                                                                                                                                                                                                                                                                                                                                                                                                                                                                                                    | P6                        | RECORD 7.1: A complete list of codes and algorithms used to classify exposures, outcomes, confounders, and effect modifiers should be provided. If these cannot be reported, an explanation should be provided.                                                                                                                                                                                                                                                                                                                                                                                                                                                                                      | Supplementary Information                             |
| 35<br>36<br>37<br>38<br>39<br>40<br>41<br>42                                                                                                          | Data sources/<br>measurement | 8 | For each variable of interest, give sources of data and details of methods of assessment (measurement). Describe comparability of assessment methods if there is more than one group                                                                                                                                                                                                                                                                                                                                                                                                                                                                                                                                         | Supplementary Information |                                                                                                                                                                                                                                                                                                                                                                                                                                                                                                                                                                                                                                                                                                      |                                                       |

|                                                                                                                                                    |                                  |    |                                                                                                                                                                                                                                                                                                                                                                                                                                                                                                                                                                      |                                                   |                                                                                                                                                       |                      |
|----------------------------------------------------------------------------------------------------------------------------------------------------|----------------------------------|----|----------------------------------------------------------------------------------------------------------------------------------------------------------------------------------------------------------------------------------------------------------------------------------------------------------------------------------------------------------------------------------------------------------------------------------------------------------------------------------------------------------------------------------------------------------------------|---------------------------------------------------|-------------------------------------------------------------------------------------------------------------------------------------------------------|----------------------|
| 1<br>2<br>3<br>4                                                                                                                                   | Bias                             | 9  | Describe any efforts to address potential sources of bias                                                                                                                                                                                                                                                                                                                                                                                                                                                                                                            | NA                                                |                                                                                                                                                       |                      |
| 5<br>6<br>7<br>8<br>9                                                                                                                              | Study size                       | 10 | Explain how the study size was arrived at                                                                                                                                                                                                                                                                                                                                                                                                                                                                                                                            | P6                                                |                                                                                                                                                       |                      |
| 10<br>11<br>12<br>13<br>14<br>15<br>16<br>17<br>18<br>19<br>20<br>21<br>22<br>23<br>24<br>25<br>26<br>27<br>28<br>29<br>30<br>31<br>32<br>33<br>34 | Quantitative variables           | 11 | Explain how quantitative variables were handled in the analyses. If applicable, describe which groupings were chosen, and why                                                                                                                                                                                                                                                                                                                                                                                                                                        | P6/7                                              |                                                                                                                                                       |                      |
| 35<br>36<br>37<br>38<br>39<br>40<br>41<br>42<br>43<br>44<br>45<br>46<br>47                                                                         | Statistical methods              | 12 | (a) Describe all statistical methods, including those used to control for confounding<br>(b) Describe any methods used to examine subgroups and interactions<br>(c) Explain how missing data were addressed<br>(d) <i>Cohort study</i> - If applicable, explain how loss to follow-up was addressed<br><i>Case-control study</i> - If applicable, explain how matching of cases and controls was addressed<br><i>Cross-sectional study</i> - If applicable, describe analytical methods taking account of sampling strategy<br>(e) Describe any sensitivity analyses | a) P6/7<br>b) P6/7<br>c) P6/7<br>d) NA<br>e) P6/7 |                                                                                                                                                       |                      |
|                                                                                                                                                    | Data access and cleaning methods |    | ..                                                                                                                                                                                                                                                                                                                                                                                                                                                                                                                                                                   |                                                   | RECORD 12.1: Authors should describe the extent to which the investigators had access to the database population used to create the study population. | 12.1) P6<br>12.2) P6 |

|                  |    |                                                                                                                                                                                                                                                                                                                                                 |                               |                                                                                                                                                                                                                                                                                                                    |    |
|------------------|----|-------------------------------------------------------------------------------------------------------------------------------------------------------------------------------------------------------------------------------------------------------------------------------------------------------------------------------------------------|-------------------------------|--------------------------------------------------------------------------------------------------------------------------------------------------------------------------------------------------------------------------------------------------------------------------------------------------------------------|----|
|                  |    |                                                                                                                                                                                                                                                                                                                                                 |                               | RECORD 12.2: Authors should provide information on the data cleaning methods used in the study.                                                                                                                                                                                                                    |    |
| Linkage          |    | ..                                                                                                                                                                                                                                                                                                                                              |                               | RECORD 12.3: State whether the study included person-level, institutional-level, or other data linkage across two or more databases. The methods of linkage and methods of linkage quality evaluation should be provided.                                                                                          | P6 |
| <b>Results</b>   |    |                                                                                                                                                                                                                                                                                                                                                 |                               |                                                                                                                                                                                                                                                                                                                    |    |
| Participants     | 13 | (a) Report the numbers of individuals at each stage of the study ( <i>e.g.</i> , numbers potentially eligible, examined for eligibility, confirmed eligible, included in the study, completing follow-up, and analysed)<br>(b) Give reasons for non-participation at each stage.<br>(c) Consider use of a flow diagram                          | a) P6<br>b) P6<br>c) Figure 1 | RECORD 13.1: Describe in detail the selection of the persons included in the study ( <i>i.e.</i> , study population selection) including filtering based on data quality, data availability and linkage. The selection of included persons can be described in the text and/or by means of the study flow diagram. | P6 |
| Descriptive data | 14 | (a) Give characteristics of study participants ( <i>e.g.</i> , demographic, clinical, social) and information on exposures and potential confounders<br>(b) Indicate the number of participants with missing data for each variable of interest<br>(c) <i>Cohort study</i> - summarise follow-up time ( <i>e.g.</i> , average and total amount) | a) P6<br>b) P6<br>c) NA       |                                                                                                                                                                                                                                                                                                                    |    |
| Outcome data     | 15 | <i>Cohort study</i> - Report numbers of outcome events or summary measures over time<br><i>Case-control study</i> - Report numbers in each exposure                                                                                                                                                                                             | P6                            |                                                                                                                                                                                                                                                                                                                    |    |

|                   |    |                                                                                                                                                                                                                                                                                                                                                                                                                 |                               |                                                                                                                                                                                                                                                                                                          |    |
|-------------------|----|-----------------------------------------------------------------------------------------------------------------------------------------------------------------------------------------------------------------------------------------------------------------------------------------------------------------------------------------------------------------------------------------------------------------|-------------------------------|----------------------------------------------------------------------------------------------------------------------------------------------------------------------------------------------------------------------------------------------------------------------------------------------------------|----|
|                   |    | category, or summary measures of exposure<br><i>Cross-sectional study</i> - Report numbers of outcome events or summary measures                                                                                                                                                                                                                                                                                |                               |                                                                                                                                                                                                                                                                                                          |    |
| Main results      | 16 | (a) Give unadjusted estimates and, if applicable, confounder-adjusted estimates and their precision (e.g., 95% confidence interval). Make clear which confounders were adjusted for and why they were included<br>(b) Report category boundaries when continuous variables were categorized<br>(c) If relevant, consider translating estimates of relative risk into absolute risk for a meaningful time period | a) P9/10<br>b) P9/10<br>c) NA |                                                                                                                                                                                                                                                                                                          |    |
| Other analyses    | 17 | Report other analyses done— e.g., analyses of subgroups and interactions, and sensitivity analyses                                                                                                                                                                                                                                                                                                              | P6/7                          |                                                                                                                                                                                                                                                                                                          |    |
| <b>Discussion</b> |    |                                                                                                                                                                                                                                                                                                                                                                                                                 |                               |                                                                                                                                                                                                                                                                                                          |    |
| Key results       | 18 | Summarise key results with reference to study objectives                                                                                                                                                                                                                                                                                                                                                        | P7 - P11                      |                                                                                                                                                                                                                                                                                                          |    |
| Limitations       | 19 | Discuss limitations of the study, taking into account sources of potential bias or imprecision. Discuss both direction and magnitude of any potential bias                                                                                                                                                                                                                                                      | P14                           | RECORD 19.1: Discuss the implications of using data that were not created or collected to answer the specific research question(s). Include discussion of misclassification bias, unmeasured confounding, missing data, and changing eligibility over time, as they pertain to the study being reported. | NA |
| Interpretation    | 20 | Give a cautious overall interpretation of results considering objectives,                                                                                                                                                                                                                                                                                                                                       | P11 - 14                      |                                                                                                                                                                                                                                                                                                          |    |

|                                                           |    |                                                                                                                                                               |            |                                                                                                                                                          |            |
|-----------------------------------------------------------|----|---------------------------------------------------------------------------------------------------------------------------------------------------------------|------------|----------------------------------------------------------------------------------------------------------------------------------------------------------|------------|
|                                                           |    | limitations, multiplicity of analyses, results from similar studies, and other relevant evidence                                                              |            |                                                                                                                                                          |            |
| Generalisability                                          | 21 | Discuss the generalisability (external validity) of the study results                                                                                         | P14        |                                                                                                                                                          |            |
| <b>Other Information</b>                                  |    |                                                                                                                                                               |            |                                                                                                                                                          |            |
| Funding                                                   | 22 | Give the source of funding and the role of the funders for the present study and, if applicable, for the original study on which the present article is based | P16        |                                                                                                                                                          |            |
| Accessibility of protocol, raw data, and programming code |    | ..                                                                                                                                                            | Throughout | RECORD 22.1: Authors should provide information on how to access any supplemental information such as the study protocol, raw data, or programming code. | Throughout |

\*Reference: Benchimol EI, Smeeth L, Guttman A, Harron K, Moher D, Petersen I, Sørensen HT, von Elm E, Langan SM, the RECORD Working Committee. The REporting of studies Conducted using Observational Routinely-collected health Data (RECORD) Statement. *PLoS Medicine* 2015; in press.

\*Checklist is protected under Creative Commons Attribution ([CC BY](https://creativecommons.org/licenses/by/4.0/)) license.

# BMJ Open

## The impact of school closures on the health and well-being of primary school children in Wales UK; a routine data linkage study using the HAPPEN survey (2018-2020).

|                                 |                                                                                                                                                                                                                                                                                                             |
|---------------------------------|-------------------------------------------------------------------------------------------------------------------------------------------------------------------------------------------------------------------------------------------------------------------------------------------------------------|
| Journal:                        | <i>BMJ Open</i>                                                                                                                                                                                                                                                                                             |
| Manuscript ID                   | bmjopen-2021-051574.R1                                                                                                                                                                                                                                                                                      |
| Article Type:                   | Original research                                                                                                                                                                                                                                                                                           |
| Date Submitted by the Author:   | 19-Jul-2021                                                                                                                                                                                                                                                                                                 |
| Complete List of Authors:       | James, M; Swansea University, Medical School<br>Marchant, Emily ; Swansea University, Medical School<br>Defeyter, Margaret; Northumbria University, Department of Psychology<br>Woodside, Jayne; Queen's University Belfast, Centre for Public Health<br>Brophy, Sinead; Swansea University, Medical School |
| <b>Primary Subject Heading</b>: | Public health                                                                                                                                                                                                                                                                                               |
| Secondary Subject Heading:      | Paediatrics                                                                                                                                                                                                                                                                                                 |
| Keywords:                       | COVID-19, Public health < INFECTIOUS DISEASES, Community child health < PAEDIATRICS                                                                                                                                                                                                                         |
|                                 |                                                                                                                                                                                                                                                                                                             |

SCHOLARONE™  
Manuscripts





I, the Submitting Author has the right to grant and does grant on behalf of all authors of the Work (as defined in the below author licence), an exclusive licence and/or a non-exclusive licence for contributions from authors who are: i) UK Crown employees; ii) where BMJ has agreed a CC-BY licence shall apply, and/or iii) in accordance with the terms applicable for US Federal Government officers or employees acting as part of their official duties; on a worldwide, perpetual, irrevocable, royalty-free basis to BMJ Publishing Group Ltd ("BMJ") its licensees and where the relevant Journal is co-owned by BMJ to the co-owners of the Journal, to publish the Work in this journal and any other BMJ products and to exploit all rights, as set out in our [licence](#).

The Submitting Author accepts and understands that any supply made under these terms is made by BMJ to the Submitting Author unless you are acting as an employee on behalf of your employer or a postgraduate student of an affiliated institution which is paying any applicable article publishing charge ("APC") for Open Access articles. Where the Submitting Author wishes to make the Work available on an Open Access basis (and intends to pay the relevant APC), the terms of reuse of such Open Access shall be governed by a Creative Commons licence – details of these licences and which [Creative Commons](#) licence will apply to this Work are set out in our licence referred to above.

Other than as permitted in any relevant BMJ Author's Self Archiving Policies, I confirm this Work has not been accepted for publication elsewhere, is not being considered for publication elsewhere and does not duplicate material already published. I confirm all authors consent to publication of this Work and authorise the granting of this licence.

1  
2  
3 **The impact of school closures on the health and well-being of primary school children in Wales**  
4 **UK; a routine data linkage study using the HAPPEN survey (2018-2020).**  
5  
6  
7

8 Dr Michaela James PhD<sup>1</sup>, Dr Emily Marchant PhD<sup>1</sup>, Professor Margaret A. Defeyter PhD<sup>2</sup>, Professor  
9 Jayne V. Woodside PhD<sup>3</sup> and Professor Sinead Brophy PhD<sup>1</sup>  
10  
11

12 Corresponding Author:

13 Dr Michaela James, PhD

14 m.l.james@swansea.ac.uk

15 Swansea University Medical School, Data Science Building, Swansea University, Singleton Park,  
16 Swansea, SA2 8PP

17 Telephone: 0792 606716  
18  
19  
20  
21  
22

23 1. Swansea University Medical School, Data Science Building, Swansea University, Singleton Park,  
24 Swansea, SA2 8PP

25 2. Department of Social Work, Education and Community Wellbeing, Northumbria University,  
26 Newcastle, NE7 7XA

27 3. Centre for Public Health, School of Medicine, Dentistry and Biomedical Sciences, Queen's  
28 University Belfast, Belfast, BT12 6BJ  
29  
30  
31  
32  
33  
34  
35  
36  
37  
38  
39  
40  
41  
42  
43  
44  
45  
46  
47  
48  
49  
50  
51  
52  
53  
54  
55  
56  
57  
58  
59  
60

## Abstract

### Objectives

This study aimed to explore the relationship between initial school closures and children's health by comparing health and wellbeing outcomes collected during school closures (April – June 2020) via HAPPEN (The Health and Attainment of Pupils in a Primary Education Network) with data from the same period in 2019 and 2018 via the HAPPEN survey.

### Setting

The study was conducted online with 161 primary schools across Wales involved in the 'HAPPEN At Home' survey.

### Participants

Data were collected via the 'HAPPEN At Home' survey capturing the typical health behaviours of children aged 8 – 11 years from 1333 participants across Wales. These data were compared with data in 2018 and 2019 also collected between April-June, from HAPPEN [2019 (n=1150) and 2018 (n=475)].

### Primary and secondary outcomes measures

Primary outcomes included validated measures of physical activity, screen time, diet and dental health, as well as wellbeing, competency and autonomy. Free school meal (FSM) status was used as a proxy for socio-economic deprivation. Analyses were repeated stratifying by FSM.

### Results

Comparing responses between April – June in 2020 (n=1068), 2019 (n=1150) and 2018 (n=475), there were improvements in physical activity levels, sleep time, happiness and general wellbeing for children during school closures compared to previous years. However, children on FSM ate less fruit and vegetables (21% less at five or more portions of fruit and vegetables (95%CI (5.7% to 37%)) and had lower self-assessed school competence compared to 2019. Compared to those not on FSM they also spent less time doing physical activity (13.03% (95%CI: 3.3% to 21.7%) and consumed more takeaways (16.3% (95%CI: 2%-30%)) during school closures.

### Conclusions

This study suggests that schools are important in reducing inequalities in physical health. The physical health (e.g., physical activity and diet) of children eligible for FSM may be affected by prolonged school closures.

1  
2  
3 Article summary

4 Strengths and limitations of this study

5  
6 *Strengths*

- 7  
8 • This study provides a novel exploration of any differences in the health and wellbeing of  
9 children prior to and during the COVID-19 school closures between March and June 2020  
10 using linked data.  
11  
12  
13  
14 • This is a pan-Wales study which recruited 1068 participants across Wales contributing to a  
15 significant gap in knowledge around the association of school closures with health and  
16 wellbeing.  
17  
18  
19  
20 • The exploration uses longitudinal self-report data from children linked with free school  
21 meal status as a proxy of deprivation.  
22  
23

24  
25 *Limitations*

- 26 • Although the 'HAPPEN At Home' survey was made available to all children aged 8-11  
27 across Wales, the findings of this paper only present those who participated in the survey  
28 and a subsample who consented to data linkage.  
29  
30

## Introduction

In early March 2020, the World Health Organisation (WHO) declared the coronavirus disease (COVID-19) to be a global pandemic<sup>1,2</sup>. To reduce the risk of person-to-person transmission, a wide range of public health measures were implemented by governments worldwide. These included the closure of educational settings in order to reduce the number of social contacts between pupils<sup>3,4</sup>. By April 2020, the United Nation's Educational, Scientific and Cultural Organisation (UNESCO) estimated that 138 countries had implemented national school closures, impacting around 80% of children worldwide<sup>4</sup>. In Wales, schools were required to close for statutory provision of education at the latest on 20<sup>th</sup> March 2020<sup>5</sup>.

There is an ongoing debate regarding the effectiveness of schools closures on transmission rates<sup>4,6,7</sup> but the fact schools were closed for a long period of time could have had a negative association on pupil's mental and physical health<sup>4,6,8,9</sup>. For example, a study from England suggests 53.3% of girls and 44% of boys aged 13 – 18 years reported having anxiety and trauma above normative levels during lockdown enforced school closures<sup>10</sup> while those aged 10 – 17 reported lower life-satisfaction in 18% of participants with 26.9% reported clinically low wellbeing scores<sup>11</sup>. In terms of physical health, school closures may have reduced opportunities for physical activity, extracurricular activities, school meals and social interaction<sup>12–15</sup>. Research shows that when children are out of school (e.g. weekends and holidays) they are less physically active, have longer screen time, irregular sleep patterns, less favourable diets, weight gain and a loss of cardiorespiratory fitness<sup>6,16</sup>. This is noted to be particularly detrimental for those from more deprived backgrounds<sup>4,7,13,15</sup>.

A report by the Royal Society's Data Evaluation and Learning for Viral Epidemics (DELVE) group highlighted concerns regarding the increased inequalities in children's physical and mental health as a result of school closures<sup>17</sup>. For example, pre-existing inequalities such as food poverty are likely to be exacerbated through reduced access to free school meals<sup>18</sup>. Thus, there is a real possibility that, in addition to a widening of the educational attainment gap which has been noted by research to be a learning loss of around 3 percentile points, or 1/5<sup>th</sup> of a school year<sup>19</sup>, school closures are also likely to result in widening inequalities in children's physical health, mental wellbeing, and health related behaviours. While school closures were the primary change in children's lives this, coupled with other restrictions such as social distancing, have been noted to result in feelings of isolation, stress, anxiety and unhappiness<sup>20</sup> particularly as support networks (e.g., friends, sports clubs) were unable to operate

<sup>21</sup>.

1  
2  
3  
4  
5 This study aims to; 1) compare children's health and wellbeing during school closures in 2020 with  
6 the same period in 2019 and 2018 and, 2) stratify the before and during period of school closures by  
7 socio-economic deprivation (as measured by free school meal (FSM) eligibility). This study was a  
8 rapid response to the initial announcement of school closures in Wales which occurred 9 days after  
9 the WHO declared a global pandemic.  
10  
11  
12

## 13 14 **Methods**

### 15 16 17 *Study Design*

18  
19  
20 HAPPEN (Health and Attainment of Pupils in a Primary Education Network) Wales was established  
21 at Swansea University in 2015 following research with headteachers who advocated for collaboration  
22 and a joined up approach to prioritising health and wellbeing within the school setting<sup>22</sup>. The network  
23 involves children aged 8–11 years completing the HAPPEN Survey, an online self-report  
24 questionnaire that was developed and designed with children. The survey captures a range of  
25 information on health and wellbeing including nutrition, physical activity, sleep, wellbeing and  
26 concentration<sup>23</sup>. Prior to school closures, children completed the survey within the school setting  
27 during curriculum time. A data collection and feedback system has been achieved by sharing group-  
28 level results to schools as a school report tailored to the curriculum. Annual reports are also shared  
29 with key stakeholders in health and education.  
30  
31  
32  
33  
34  
35  
36  
37

38 In light of the COVID-19 pandemic, HAPPEN aimed to understand how school closures were  
39 affecting the health and wellbeing of children in Wales. Therefore, the original HAPPEN Survey was  
40 adapted to the 'HAPPEN At Home' survey to capture changes in health behaviours due to school  
41 closures and provide schools the opportunity to gain a better understanding of pupil's health and  
42 wellbeing. This enabled schools to plan for and address any concerns they identified within their  
43 'HAPPEN At Home' report during the return to school. The survey was granted ethical approval by  
44 Swansea University's Medical School on 15/04/2020 (Reference: 2017-0033B).  
45  
46  
47  
48  
49

### 50 51 *Participants*

52  
53 Recruitment of participants and data collection was delivered online due to COVID-19 restrictions.  
54 Pre-existing HAPPEN schools were emailed initially inviting them to participate in the 'HAPPEN At  
55 Home' survey. Next the survey was then opened wider and all primary schools in Wales were  
56 contacted through a number of methods including direct email, a social media campaign (paid  
57 advertisement on Facebook and Twitter) and promotion from key stakeholders (e.g., regional  
58  
59  
60

1  
2  
3 education consortia). Schools were invited to share details of the survey (including study aims and a  
4 parent information sheet) amongst parents/guardians so that children could complete the survey at  
5 home at a convenient time. Communication between schools and parents/guardians was achieved  
6 through existing channels such as text messages, newsletters and social media. This gave parents the  
7 opportunity to opt their child out from the survey. Child consent was also obtained at the start of the  
8 survey. This is the same sampling method as the 2019 data however, 2018 data was collected in South  
9 Wales as the network was not pan-Wales in 2018. This opt-out method of recruiting participants  
10 aimed to ensure that a representative sample were recruited which could reflect all children in Wales.  
11  
12  
13  
14  
15  
16

### 17 *Patient and Public Involvement*

18  
19  
20 The research question was developed as a result of national school closures due to COVID-19 across  
21 the UK. The HAPPEN Survey was rapidly adapted to the HAPPEN at Home survey to address a  
22 significant gap regarding child-reported behaviours during school closures. The survey development  
23 involved input from key stakeholders including regional education consortia and primary school staff  
24 to ensure applicability of findings. The adapted HAPPEN at Home survey aimed to capture child-  
25 reported health and wellbeing during school closures to support schools in tailor health and wellbeing  
26 plans to suit the needs of their learners. Findings from the study will be reported back to schools via a  
27 report and social media dissemination.  
28  
29  
30  
31  
32  
33

### 34 *Data Collection*

35  
36  
37 Primary data were collected via the 'HAPPEN At Home' Survey between April and June 2020. The  
38 survey captured the typical health behaviours of children aged 8-11. Items included validated  
39 measures of physical activity, screen time, diet and dental health<sup>24</sup>, as well as wellbeing, competency  
40 and autonomy. Items included in the analyses are presented as supplementary information (S1). The  
41 full versions of the 'HAPPEN At Home' and original HAPPEN survey can be viewed in the  
42 supplementary information (S2 and S3 respectively). The primary difference between the original  
43 survey and the 'at home' version was those questions relating to the school day specifically were  
44 removed during school closures.  
45  
46  
47  
48  
49  
50

51  
52 The survey was conducted online and could be completed by children at home or in school (key  
53 worker or vulnerable children) via mobile phone, tablet, and computer. The process of data coding  
54 involved two researchers. The first researcher downloaded the raw data, cleaned the data, checked for  
55 duplicates, generated a unique participant ID number, and removed identifiable information. This  
56 process protects participants' anonymity by ensuring that the second researcher generating the report  
57  
58  
59  
60

1  
2  
3 and conducting the analysis could not identify individuals. Raw data was coded using STATA  
4 (version 16) to produce a dataset for the purpose of analyses.  
5  
6  
7

8 Free school meal (FSM) status was used as a proxy for deprivation<sup>25</sup> and was obtained via the Secure  
9 Anonymised Information Linkage (SAIL) Databank<sup>26</sup>. To link the data, the demographic data are  
10 separated from the responses and sent to a trusted third party, NHS Wales Informatics Service (NWIS)  
11 and the response data goes to SAIL using a secure file upload. A unique Anonymous Linking Field  
12 (ALF) is assigned to the person-based record before it is joined to clinical data via a system linking  
13 field.  
14  
15  
16

### 17 18 19 *Analysis*

20  
21  
22 Primary analysis looked at whole group mean comparison of all children from 2018 and 2019 (pre-  
23 school closures) to 2020 (school closures). Secondary analysis included the subset of children from  
24 2019-2020 stratified by FSM. The 2018 data was used to account for annual trends prior to lockdown.  
25 Two sample t-tests with equal variance using groups (years) were used to determine whether there  
26 was any significant difference between means for tables 1, 2 and 3. This was carried out in STATA  
27 (version 16).  
28  
29  
30  
31  
32

33 For the analysis, continuous data was dichotomised to bring in line with government guidelines for  
34 example physical activity and diet and dental health responses were coded as 1 if participants  
35 responded with being active for 7 days and 0 if less. Diet and dental health were coded as 1 if  
36 participants reported eating over 5 portions of fruit and vegetables and 1 if they reported brushing  
37 their teeth more than twice a day. Wellbeing question responses (including school) were coded as 1 if  
38 participants reported a score  $\geq 8$  and a 1 if less than 7. Mental health questions were coded as 1 if  
39 continuous scores equated to clinical emotional or behaviour difficulties<sup>27</sup>. This coding then gave a  
40 percentage of participants meeting government guidelines for health behaviours in this age group. S1  
41 provides further information on the variables used in the analysis.  
42  
43  
44  
45  
46  
47  
48

49 For this paper, school closure was categorised as the period between 20<sup>th</sup> March 2020; the date in  
50 which the Minister for Education in Wales set for the closure of statutory education provision and 29<sup>th</sup>  
51 June 2020; the date in which schools returned for a phased approach in Wales. The 'HAPPEN At  
52 Home' survey was launched in 23<sup>rd</sup> April 2020 and closed on the 26<sup>th</sup> June 2020. Analysis was carried  
53 out in November 2020 following data cleaning and SAIL linkage. This involved comparison of means  
54 to demonstrate any differences between time points. Presentation of the outcomes give the confidence  
55 interval of the difference between groups. The RECORD statement has been used to underpin the  
56 reporting of this data.  
57  
58  
59  
60



## Results

The 'HAPPEN At Home' survey had 1333 responses, from 161 primary schools across Wales. Following the exclusion process presented in Figure 1 (no consent for linkage, missing FSM data), the final linked data ('HAPPEN At Home' responses and FSM status) for subsequent analysis included 574 participants. Data were stratified by FSM status and compared with 2019 from the same time period (March to June 2019). A breakdown of demographics by FSM status and time period is presented in Table 1. It is worth highlighting that there are no significant differences between 2019 and 2020 demographics. However, the 2019 cohort was significantly less deprived than 2018 (FSM eligibility: -7.2% 95% CI: -11.39% to -3.01%, WIMD: 301.28 95% CI: 227.61 to 374.96).

Table 1 – Demographics

| Demographics |                   | March to June 2018 (n=475) | March to June 2019 (n=1150) | School closures 2020 (n=1068) | Difference (2019 – 2020) |
|--------------|-------------------|----------------------------|-----------------------------|-------------------------------|--------------------------|
| Gender       | Boy               | 233 (49.19%)               | 594 (51.65%)                | 535 (50.09%)                  | -1.56% (-.26 to 5.71)    |
|              | Girl              | 241 (50.65%)               | 548 (47.65%)                | 528 (49.44%)                  | 1.79% (-2.37 to 5.94)    |
|              | Prefer Not To Say | 1 (0.16%)                  | 8 (0.70%)                   | 5 (0.47%)                     | -.23% (-.04 to .09)      |
| Age          | Mean              | 10.30                      | 10.27                       | 9.99                          | -.28 (-.36 to -.19)      |
|              | 3                 | NA                         | NA                          | 92 (8.61%)                    | NA                       |
| Year Group   | 4                 | 69 (14.54%)                | 303 (26.35%)                | 373 (34.93%)                  | 8.58% (.47 to 12.39)     |
|              | 5                 | 233 (49.12%)               | 403 (35.04%)                | 283 (26.50%)                  | -8.54% (.47 to 12.34)    |
|              | 6                 | 173 (36.35%)               | 444 (38.61%)                | 320 (29.96%)                  | -8.65% (.47 to 12.55)    |
| FSM          | Eligible for FSM  | 9.77%                      | 16.98%                      | 15.75%                        | 1.23% (-.02 to 0.5)      |
| Deprivation* | WIMD Rank         | 1247.77                    | 946.48                      | 913.52                        | 32.96 (-25.74 to 91.66)  |

\*As measured by the WIMD (Welsh Index of Multiple Deprivation is the official measure of relative deprivation in Wales where 1 = most deprived and 1909 = least deprived)<sup>28</sup>

### *Differences in health outcomes before (2018-2019) and during school closures (2020)*

During school closures there was a significant improvement in physical activity (see Table 2) (4.5% increase in number achieving 60 minutes of physical activity a day (95% CI: 0.95% to 8.14%) and in sleep (10.39% more having the recommended 9 hours sleep, 95% CI: 7.48% to 13.29%). Children also report increases in screen time (23.39%, 95% CI: 23.39% (19.37 to 27.43) and feeling less tired (-6.94%, 95% CI: 9.64 to -4.23). There were no significant differences in these variables between 2018 and 2019 suggesting that these findings are associated with lockdown restrictions and school closures

1  
2  
3 as opposed to time trends. Perceptions of general competency and feeling safe in your area (S1) also  
4 increased during school closures.  
5  
6  
7

8 Regarding dietary and dental health behaviours, the amount of daily teeth brushing decreases annually  
9 (Table 2) but this is more pronounced between 2019 and 2020 (-14.92%, CI: -18.62 to -11.21).

10 Interestingly the number of takeaways consumed per week has decreased during 2020 (-20.29%, CI: -  
11 24.34 to -16.33) while sugary snack consumption has increased (15.03%, CI: 11.31 to 18.74).

12 However, there appears to be an annual trend in sugary snack consumption when compared to 2019  
13 and 2018 data. A higher proportion of children report eating breakfast during school closures  
14 compared to previous years (4.85%, 95% CI: 3.00 to 6.69).  
15  
16  
17  
18  
19  
20  
21  
22  
23  
24  
25  
26  
27  
28  
29  
30  
31  
32  
33  
34  
35  
36  
37  
38  
39  
40  
41  
42  
43  
44  
45  
46  
47  
48  
49  
50  
51  
52  
53  
54  
55  
56  
57  
58  
59  
60

1  
2  
3  
4  
5  
6  
7  
8  
9  
10  
11  
12  
13  
14  
15  
16  
17  
18  
19  
20  
21  
22  
23  
24  
25  
26  
27  
28  
29  
30  
31  
32  
33  
34  
35  
36  
37  
38  
39  
40  
41  
42  
43  
44  
45  
46

*Table 2 - Differences between those who took part in the HAH survey and previous HAPPEN responses (group comparison between 2018, 2019 and 2020)*

| H/WB Indicator            |                          | March – June<br>2018 (n=475) | March – June<br>2019 (n=1150) | School closures<br>(n=1068) | Difference<br>(2018 – 2019)      | Difference<br>(2019 – school closures) |
|---------------------------|--------------------------|------------------------------|-------------------------------|-----------------------------|----------------------------------|----------------------------------------|
| Physical                  | Activity                 | 21.57%                       | 22.78%                        | 27.32%                      | 1.21% (-3.50 to 5.93)            | <b>4.54% (.93 to 8.14)</b>             |
| Activity &<br>Screen Time | Screen Time              | 27.94%                       | 33.22%                        | 56.61%                      | 5.28% (.01 to 10.53)             | <b>23.39% (19.37 to 27.43)</b>         |
|                           | Sleep                    | 84.31%                       | 80.43%                        | 90.82%                      | -3.88% (-8.27 to .51)            | <b>10.39% (7.48 to 13.29)</b>          |
|                           | Tired                    | 14.22%                       | 15.39%                        | 8.45%                       | 1.17% (-2.87 to 5.22)            | <b>-6.94% (-9.64 to -4.23)</b>         |
|                           | Concentrate              | 26.23%                       | 24.00%                        | 17.46%                      | -2.23% (-7.09 to 2.64)           | <b>-6.54% (-9.91 to -3.1)</b>          |
|                           | General Competency       | 88.35%                       | 84.26%                        | 90.82%                      | <b>-4.09% (-7.86 to -3.0)</b>    | <b>6.56% (3.81 to 9.31)</b>            |
|                           | Walk To Park*            | N/A                          | 88.81%                        | 94.37%                      | N/A                              | <b>5.56% (3.24 to 7.87)</b>            |
|                           | Safe in Area             | 77.21%                       | 69.65%                        | 75.44%                      | <b>-7.56% (-12.63 to -2.46)</b>  | <b>5.79% (2.07 to 9.51)</b>            |
| Diet & Dental<br>Health   | Toothbrushing            | 83.82%                       | 78.87%                        | 63.95%                      | <b>-4.95% (-4.45 to -9.45)</b>   | <b>-14.92% (-18.62 to -11.21)</b>      |
|                           | Breakfast                | 93.87%                       | 92.43%                        | 97.28%                      | -1.44% (-4.35 to 1.48)           | <b>4.85% (3.00 to 6.69)</b>            |
|                           | Fizzy Drink              | 4.17%                        | 7.22%                         | 5.35%                       | <b>3.05% (.28 to 5.81)</b>       | -1.87% (-3.89 to .16)                  |
|                           | Sugary Snack             | 16.18%                       | 21.30%                        | 36.33%                      | <b>5.12% (.61 to 9.64)</b>       | <b>15.03% (11.31 to 18.74)</b>         |
|                           | Takeaway                 | 45.10%                       | 54.09%                        | 33.80%                      | <b>8.99% (3.35 to 14.62)</b>     | <b>-20.29% (-24.34 to -16.22)</b>      |
|                           | Fruit/Veg                | 83.09%                       | 71.30%                        | 69.94%                      | <b>-11.79% (-16.68 to -6.88)</b> | -1.36% (-5.15 to 2.43)                 |
| Wellbeing                 | Health Score             | 77.54%                       | 69.22%                        | 79.11%                      | <b>-8.32% (-13.14 to -3.50)</b>  | <b>9.89% (6.26 to 13.53)</b>           |
|                           | Family Score             | 90.04%                       | 88.09%                        | 94.47%                      | -1.95% (-5.35 to 1.44)           | <b>6.38% (4.03 to 8.74)</b>            |
|                           | Friends Score            | 86.86%                       | 81.82%                        | 81.83%                      | <b>-5.04% (-9.03 to -1.04)</b>   | 0.01% (-3.20 to 3.22)                  |
|                           | Appearance Score         | 69.07%                       | 58.52%                        | 75.18%                      | <b>-10.55% (-15.73 to -5.35)</b> | <b>16.66% (12.79 to 20.53)</b>         |
|                           | Life Score               | 81.99%                       | 74.43%                        | 87.07%                      | <b>-7.56% (-12.08 to -3.03)</b>  | <b>12.64% (9.38 to 15.90)</b>          |
|                           | Autonomy                 | 88.35%                       | 89.22%                        | 85.11%                      | 0.87% (-2.49 to 4.23)            | <b>-4.11% (-6.8 to -1.32)</b>          |
| Mental Health             | Emotional Difficulties   | 14.19%                       | 20.96%                        | 12.17%                      | <b>6.77% (2.56 to 10.95)</b>     | <b>-8.79% (-11.87 to -5.69)</b>        |
|                           | Behavioural Difficulties | 7.84%                        | 14.78%                        | 8.89%                       | <b>6.94% (3.37 to 10.50)</b>     | <b>-5.89% (-8.58 to -3.19)</b>         |
| School                    | School Score             | 58.05%                       | 53.91%                        | 58.14%                      | -4.14% (-9.47 to 11.94)          | <b>4.23% (.09 to 8.36)</b>             |
|                           | School Competency        | 89.62%                       | 85.13%                        | 80.99%                      | <b>-4.49% (-8.15 to -.82)</b>    | <b>-4.14% (-7.25 to -1.02)</b>         |

\*Question not included in HAPPEN in 2018 Survey  
\*\*Bold denotes significance (p=0.05)

Table 3 - Exploring any differences between those who took part in the HAH survey and those who have taken part in 2019 stratified by FSM

|                                       |                          | March – June 2019 |                | School closures 2020 |            |                                   |                                  |
|---------------------------------------|--------------------------|-------------------|----------------|----------------------|------------|-----------------------------------|----------------------------------|
| H/WB Indicator                        |                          | No FSM<br>(n=520) | FSM<br>(n=120) | No FSM<br>(n=384)    | FSM (n=53) | No FSM Difference                 | FSM Difference                   |
| Physical<br>Activity &<br>Screen Time | Activity                 | 25.00%            | 23.33%         | 28.12%               | 15.09%     | 3.12% (-2.69 to 8.94)             | -8.24% (-21.47 to 4.99)          |
|                                       | Screen Time              | 29.61%            | 42.50%         | 60.67%               | 58.49%     | <b>31.06% (24.84 to 37.28)</b>    | 15.99% (-0.18 to 32.16)          |
|                                       | Sleep                    | 81.34%            | 75.83%         | 89.84%               | 83.01%     | <b>8.50% (3.80 to 13.19)</b>      | 7.18% (-6.32 to 20.69)           |
|                                       | Tired                    | 14.03%            | 25.83%         | 9.11%                | 20.75%     | <b>-4.92% (-9.19 to -0.64)</b>    | -5.08% (-19.09 to 8.94)          |
|                                       | Concentrate              | 26.15%            | 16.66%         | 16.66%               | 18.86%     | <b>-9.49% (-14.93 to -4.03)</b>   | 2.20% (-10.19 to 14.59)          |
|                                       | General Competency       | 85.38%            | 78.33%         | 92.18%               | 90.56%     | <b>6.80% (2.57 to 11.03)</b>      | 12.23% (-0.18 to 24.65)          |
|                                       | Walk To Park             | 87.23%            | 94.06%         | 94.01%               | 92.45%     | <b>6.78% (2.85 to 10.70)</b>      | -1.61% (-9.66 to 6.43)           |
|                                       | Safe in Area             | 72.11%            | 54.16%         | 76.82%               | 62.26%     | 4.71% (-10.74 to 10.48)           | 8.10% (-8.08 to 24.27)           |
| Diet & Dental<br>Health               | Toothbrushing            | 83.46%            | 64.16%         | 63.80%               | 47.16%     | <b>-19.65% (-25.22 to -14.08)</b> | <b>-17.00% (-32.89 to -1.09)</b> |
|                                       | Breakfast                | 94.03%            | 86.66%         | 97.65%               | 92.45%     | <b>3.62% (0.90 to 6.32)</b>       | 5.79% (-4.64 to 16.22)           |
|                                       | Fizzy Drink              | 5.76%             | 13.33%         | 4.68%                | 7.54%      | -1.08% (-4.04 to 1.88)            | -5.79% (-16.22 to 4.64)          |
|                                       | Sugary Snack             | 20.38%            | 18.33%         | 36.97%               | 32.07%     | <b>16.59% (10.79 to 22.39)</b>    | <b>13.74% (0.21 to 27.26)</b>    |
|                                       | Takeaway                 | 54.23%            | 57.50%         | 34.89%               | 50.94%     | <b>-19.34% (-25.80 to -12.86)</b> | -6.56% (-22.80 to 9.68)          |
|                                       | Fruit/Veg                | 74.23%            | 66.66%         | 68.75%               | 45.28%     | -5.48% (-11.41 to 0.45)           | <b>-21.38% (-37.08 to -5.67)</b> |
| Wellbeing                             | Health Score             | 72.30%            | 60.83%         | 78.64%               | 66.03%     | <b>6.34% (0.62 to 12.04)</b>      | 5.20% (-10.63 to 21.04)          |
|                                       | Family Score             | 89.03%            | 81.66%         | 94.01%               | 92.45%     | <b>4.98% (1.23 to 8.71)</b>       | <b>10.79% (0.80 to 22.37)</b>    |
|                                       | Friends Score            | 83.07%            | 72.50%         | 83.33%               | 71.69%     | 0.26% (-4.68 to 5.20)             | -0.81% (-15.46 to 13.85)         |
|                                       | Appearance Score         | 60.38%            | 45.83%         | 75.78%               | 66.03%     | <b>15.40% (9.25 to 21.53)</b>     | <b>20.20% (4.13 to 36.27)</b>    |
|                                       | Life Score               | 74.80%            | 63.33%         | 89.32%               | 79.24%     | <b>14.52% (9.41 to 19.61)</b>     | <b>15.91% (0.85 to 30.97)</b>    |
|                                       | Autonomy                 | 88.65%            | 88.33%         | 85.41%               | 84.90%     | <b>-3.24% (-7.63 to 11.62)</b>    | -3.43% (-14.32 to 7.46)          |
| Mental Health                         | Emotional Difficulties   | 18.65%            | 26.66%         | 10.93%               | 20.75%     | <b>-7.72% (-12.45 to -2.97)</b>   | -5.91% (-20.03 to 8.21)          |
|                                       | Behavioural Difficulties | 14.42%            | 27.50%         | 6.77%                | 20.75%     | <b>-7.65% (-11.78 to -3.51)</b>   | -6.75% (-20.96 to 7.47)          |
| School                                | School Score             | 66.34%            | 61.66%         | 74.47%               | 56.60%     | <b>8.13% (2.08 to 14.17)</b>      | -5.06% (-21.07 to 10.95)         |
|                                       | School Competency        | 86.34%            | 80.00%         | 79.42%               | 58.49%     | <b>-6.92% (-11.81 to -2.02)</b>   | <b>-21.51% (-35.60 to -7.41)</b> |

\*Bold denotes significance (p=0.05)

1  
2  
3 Between 2018 and 2019, wellbeing shows decreases in a number of areas including perceptions of  
4 health (-8.32%, 95% CI: -13.14 to -3.50), friends (-5.04%, 95% CI: -9.03 to -1.04), appearance (-  
5 10.55% (-15.73 to -5.35) and life (-7.56% (-12.08 to -3.03). However, during school closures this trend  
6 reversed (table 2). Most notably children reported being happier with their health (9.89%, CI: 6.26 to  
7 13.53), appearance (16.66%, CI: 12.79 to 20.53) and life (12.64%, CI: 9.38 to 15.90). A similar trend  
8 is evident in terms of mental health (fewer emotional (-8.79% (-11.87 to -5.69) and behavioural  
9 difficulties (-5.89% (-8.58 to -3.19).

10  
11  
12  
13  
14  
15  
16 Despite being away from the school environment, children report feeling happier with school  
17 compared to 2019 (4.23% (.09 to 8.36). Yet their self-reported school competency was reduced during  
18 school closures (-21.51% (-35.60 to -7.41). However, there is an annual decrease since 2018 suggesting  
19 a temporal trend in pupils' perception of school ability (-6.92% (-11.81 to -.202).

#### 20 21 22 23 24 *Differences in health outcomes before (2018-2019) and during school closures (2020) stratified by* 25 *deprivation (FSM eligibility)*

26  
27  
28 Compared to non-FSM children (Table 3), those eligible for FSM walked to the park less (compared  
29 to a 6.78% increase in non-FSM (2.85 to 10.70)), their takeaway consumption showed less decline (-  
30 6.54% compared to -19.34% in non-FSM) but their fruit and vegetable consumption significantly  
31 declined (-21.28%, CI: -37.08 to -5.67). This decline was not seen in non-FSM children. The decline  
32 in perceptions of school competency from 2019 to 2020 was three times higher within the FSM group  
33 (-21.51% (-35.60 to -7.41).

34  
35  
36  
37  
38  
39 During school closures, there was a significant difference of reported daily physical activity between  
40 those on FSM and those not on FSM (13.03% difference, 95% CI: 3.3% to 21.66%). Compared to  
41 non-FSM children, a lower proportion of FSM eligible children reported to engage in at least 60  
42 minutes of daily physical activity during school closures (non-FSM: 28.12%; FSM: 15.09%).  
43 Children not on FSM showed a significant increase in screen time (31.06% (24.84 to 37.28) and  
44 reported a lower ability to concentrate (-9.49% (-14.93 to -4.03). However, there was an increase from  
45 2019 to 2020 in family wellbeing scores for all children and especially among those eligible for FSM  
46 (non-FSM: 4.98%; FSM: 10.79%). It is worth noting that the majority of differences, particularly  
47 improvements, in health behaviours were noted within the non-FSM group suggesting that findings  
48 for the overall group during school closures were driven by those who are not eligible for FSM.  
49  
50  
51  
52  
53  
54  
55  
56

#### 57 **Discussion**

58  
59  
60

1  
2  
3 This study aimed to capture the associations between the initial school closures between March and  
4 June 2020 and the health and wellbeing of children. Improvements during school closures for children  
5 included physical activity, sleep, wellbeing (family, health, life) and emotional and behavioural  
6 difficulties. However, it is likely that these improvements were predominantly because of participants  
7 who were not eligible for free school meals according to this study's findings. Highlighting the health  
8 inequalities between less and more deprived that existed even prior to the pandemic and school  
9 closures. Primary school children report higher wellbeing especially family score, during lockdown.  
10 However, aspects which were detrimental during school closures included less tooth brushing for all  
11 children. FSM children reported a reduction in the time spent engaged in physical activity,  
12 significantly less fruit and vegetable consumption and lower self-assessed school competence than  
13 before school closures.  
14  
15  
16  
17  
18  
19  
20  
21

### 22 *Physical activity and screen time*

23  
24  
25 Overall, small improvements to time spent being physically active were seen during school closures.  
26 However, this increase is likely to be amongst non-FSM pupils. For those on FSM activity decreased,  
27 recent research around school staff perceptions of the return to school echo this finding. Teachers  
28 perceived that their pupils had been less active during lockdown restrictions and observed upon the  
29 phased return to school that some children had gained weight<sup>29</sup>. Findings from the current study  
30 suggest this may be more pronounced for more deprived pupils. Those eligible for FSM did report  
31 feeling less safe in their areas which may be why they were less active. Evidence shows that physical  
32 activity is associated with the wider environment including the socioeconomic status of a  
33 neighbourhood which underpins the contextual effects of higher social disorder and lower perceived  
34 safety as a the status lowers<sup>30</sup>. However, those not eligible for FSM report feeling safer in their local  
35 areas. Therefore, this study suggests that the implications of being confined to your local area during  
36 periods of restricted movement alongside parents/caregivers may improve perceptions of safety for  
37 those less deprived. This in turn, could mean they were happier to be active in their areas which  
38 would account for differences in physical activity by deprivation. Due to the lack of significant  
39 difference in deprivation levels between 2019 and 2020, it is likely that increased exposure to these  
40 environments would account for higher safety scores rather than a difference in cohort demographics.  
41  
42  
43  
44  
45  
46  
47  
48  
49  
50

51  
52 Non-FSM children were more active. However, non-FSM children's screen time was significantly  
53 higher during school closures. Their reported daily screen time (>2 hours) doubled compared to the  
54 previous year. This is comparative to similar research which also notes increases in screen time during  
55 the pandemic<sup>31</sup>. It has been proposed that this could be because loosening household rules around  
56 screen time usage to facilitate entertainment or social connection through computer games or social  
57 media<sup>31</sup>. While deprivation is associated with higher screen time in adults<sup>32</sup>, it is less clear what that  
58  
59  
60

1  
2  
3 means for children. This study suggests that less deprived children have higher screen time which is a  
4 contrast to adults. It may be that these children have more access to technology which enables screen  
5 time.  
6  
7

8  
9 The HAPPEN survey asks about screen time in reference to “TV, video games, and using the  
10 internet”. It is possible that children perceived using the internet as the delivery of education through  
11 online learning. Thus, children will have utilized screens (e.g., laptops and tablets) to aid learning.  
12 Less deprived families may have better access to these resources and therefore, screen time may be  
13 higher in this group. This is supported by research from the Institute for Fiscal Studies<sup>33</sup> where  
14 children from less deprived families were spending 30% more time engaging in home learning  
15 activities than those more deprived. This may also reflect why perceptions of school competency  
16 remains much higher in the less deprived group. This suggests that non-FSM children were more  
17 engaged with learning tasks and therefore had perceived higher competence and confidence with  
18 learning and development. This may contribute towards the estimated 46% increase in learning gap  
19 between disadvantaged children and their peers reported by teachers<sup>34</sup>. With the relationship between  
20 education and health well documented, this has implications for children’s future health and wellbeing  
21 outcomes<sup>35</sup>. Further evidence of this is seen in feeling part of your school community which again is  
22 much higher in those not on FSM.  
23  
24  
25  
26  
27  
28  
29  
30  
31  
32

33 For those eligible for FSM, the amount of screen time may appear positive in comparison to non-FSM  
34 but could also highlight inequalities relating to digital poverty and contribute to gaps in learning  
35 progression. Previous HAPPEN research<sup>29</sup> has highlighted the lack of access to digital equipment,  
36 sharing devices and a lack of digital competency in accessing home learning. This is worth noting as  
37 while less screen time could be perceived as a benefit to physical health in FSM children, during  
38 school closures it could also mean that learning gaps are being widened.  
39  
40  
41  
42  
43

44 Children not on FSM report to not being able to concentrate as much compared to the previous year.  
45 The increased screen time may be due to increased online working for non-FSM pupils during school  
46 closures may have been detrimental to concentration. More research is needed into how screen time  
47 was consumed during school closures and the impact this has on health is required.  
48  
49  
50  
51

### 52 *Diet and dental health*

53  
54

55 Toothbrushing was significantly lower in children compared to 2019 regardless of FSM status. This  
56 meant many children were brushing their teeth less than the recommended guidelines of twice per  
57 day. Research shows that lack of routine and structure puts children at risk of poorer dental hygiene<sup>36</sup>  
58 which can have long-term effects. It is possible that school closures disrupted bedtime and wake time  
59  
60

1  
2  
3 routines in which teeth brushing would usually take place, and therefore may account for the lower  
4 frequency of teeth brushing. In addition, the lack of access to school-based dental hygiene  
5 programmes such as ‘Designed to Smile’<sup>37</sup> may have a significant impact on teeth brushing  
6 behaviour. This coupled with observed increases in sugary snack consumption through school  
7 closures may have negative associations with dental hygiene.  
8  
9  
10

11  
12 Those on FSM saw the biggest effect on dietary behaviours during lockdown restrictions. Not only  
13 was takeaway consumption higher in this group, but FSM children also consumed fewer fruit and  
14 vegetables during this time. FSM are a key public health policy to aid in reducing food insecurity and  
15 associated negative health and educational inequalities in the UK. It appears that those utilising FSM  
16 have been significantly affected by school closures in not being able to access regular meal provision  
17 in a school setting in Wales. Research shows that almost half of all children on FSM were unable to  
18 access them during school closures<sup>38</sup>.  
19  
20  
21  
22  
23

24  
25 Providing children with nutritional meals in school helps to narrow health inequalities and the  
26 educational attainment gap between the most and least deprived children<sup>39,40</sup>. Findings from this study  
27 add further evidence to disparities amongst groups of children from different backgrounds. While the  
28 initial lockdown in March 2020 was temporary, the findings of the current study support the mounting  
29 evidence that prolonged lockdown periods will affect children’s physical health<sup>38</sup>.  
30  
31  
32  
33

### 34 *Wellbeing and mental health*

35  
36  
37 Within this current study, improvements in family wellbeing was observed during school closures for  
38 both groups of children. This is likely due to an increased number of parents working from home or  
39 being furloughed, enabling some children to spend extra time that they otherwise would not have had  
40 with caregivers. School staff acknowledge this, they reported children having more opportunities for  
41 walking, exploring and spending time outside, with this contributing to strengthened family  
42 relationships<sup>29</sup>.  
43  
44  
45  
46  
47

48  
49 Happiness with life was also significantly higher generally and increased equally in both groups from  
50 2019 data. It is important to note that deprived children still report feeling less happy in general  
51 compared to non-FSM children. The findings regarding physical activity may underpin this, with  
52 increased opportunities to play and be outdoors, for example having more time during lockdown and  
53 feeling safer in their areas. Moreover, behavioural and emotional difficulties reported during school  
54 closures was significantly lower. In less deprived children, this number was almost half suggesting a  
55 more positive relationship in those not on FSM. Interestingly, previous research has found the  
56 opposite, with parents and teachers reporting increases in emotional and behavioural difficulties as  
57  
58  
59  
60



1  
2  
3 well as low mood, anxiety and social disconnection<sup>29,41</sup>. It is possible these conflicting findings  
4 highlight the difference between child reported and adult external observations.  
5  
6  
7

### 8 **Limitations**

9

10  
11 Although the 'HAPPEN At Home' survey was made available to all children aged 8-11 across Wales,  
12 the findings of this paper only present those who participated in the survey and a subsample who  
13 consented to data linkage. As the survey took place at home due to school closures, those who  
14 participated will be from families who have internet access. The difference in inequalities is likely to  
15 be much higher among those who could not participate due to lack of access to the internet. This also  
16 means we cannot ensure a fully representative sample of children has been recruited across Wales.  
17 While the sampling strategy was the same for 2020 and 2019, 2018 data was sampled more  
18 purposefully from South Wales which may have an influence on findings from this year. Furthermore,  
19 a small subset of participants (n=14) responded at two timepoints to the various HAPPEN surveys.  
20 This sample was too small to analyse and therefore, it is not possible to identify the independence  
21 which is a limitation of this study.  
22  
23  
24  
25  
26  
27  
28  
29  
30  
31  
32

33 There is evidence that FSM status is not a perfect measure of socio-economic deprivation<sup>42</sup> and there  
34 are also a number of other factors that contribute to the deprivation levels of a child. However, FSM  
35 status does come very close to identifying a group of children who may be at disadvantage due to  
36 their socio-economic position<sup>42</sup>. With this in mind it is also possible that differences between the three  
37 groups are due to sample characteristics (e.g., varying deprivation levels) in conjunction with school  
38 closures.  
39  
40  
41  
42  
43  
44  
45  
46

### 47 **Conclusion**

48

49  
50 Overall, findings from this study show that, as a group, many things improved during the period of  
51 school closures for children including physical activity, sleep and general wellbeing. However, there  
52 are significant differences and inequalities when stratified by FSM. Improvements were mostly  
53 observed in non-FSM children. For children eligible for FSM, diet (e.g. lower fruit and vegetable  
54 intake), physical activity and dental health was significantly affected. These findings are concerning  
55 as they illustrate the importance of the entire school day, including free school meal provision, in  
56 attenuating physical health inequalities in children.  
57  
58  
59  
60

1  
2  
3  
4  
5 This paper shows the short-term associations of school closures on children's health and wellbeing  
6 and it is worth noting that the long-term impacts of further school closures and national lockdown  
7 may have more detrimental impacts on the health and wellbeing of children. This research highlights  
8 a number of concerns regarding wider physical health inequalities such as obesity. When schools  
9 reopen this research suggests there will be a need to address wider physical health inequalities such as  
10 obesity, poor dental health, lack of vitamins and minerals and lower fitness in those from deprived  
11 backgrounds.  
12  
13  
14  
15  
16  
17  
18  
19  
20  
21  
22  
23  
24  
25  
26  
27  
28  
29  
30  
31  
32  
33  
34  
35  
36  
37  
38  
39  
40  
41  
42  
43  
44  
45  
46  
47  
48  
49  
50  
51  
52  
53  
54  
55  
56  
57  
58  
59  
60

For peer review only

1  
2  
3  
4  
5  
6  
7  
8  
9  
10  
11  
12  
13  
14  
15  
16  
17  
18  
19  
20  
21  
22  
23  
24  
25  
26  
27  
28  
29  
30  
31  
32  
33  
34  
35  
36  
37  
38  
39  
40  
41  
42  
43  
44  
45  
46  
47  
48  
49  
50  
51  
52  
53  
54  
55  
56  
57  
58  
59  
60

Figure 1 - Flow of HAPPEN study (exclusion process and data linkage)

For peer review only

1  
2  
3  
4  
5  
6  
7  
8  
9  
10 *Contributorship statement*

11  
12 MJ wrote the first draft of the paper and all authors provided critical input and revisions for all further  
13 drafts. MJ, EM and SB designed data collection and MJ and SB undertook data analysis. MJ, EM, SB,  
14 MD and JW aided in interpretation of findings and supervision of study quality. The authors thank  
15 key stakeholders from regional consortia and schools for their participation in the development in the  
16 'HAPPEN At Home' survey. The corresponding author attests that all listed authors meet authorship  
17 criteria and that no others meeting the criteria have been omitted.  
18  
19

20  
21  
22  
23 *Declaration of Interests*

24  
25 All authors declare no competing interest including no financial and personal relationships with other  
26 people or organisations that might have an interest in the submitted work and no other relationships or  
27 activities that could appear to have influenced the submitted work.  
28  
29

30  
31  
32 *Role of Funding Source*

33  
34  
35 This work was supported by the National Centre for Population Health and Wellbeing Research  
36 (NCPHWR) funded by Health and Care Research Wales and Welsh Government. The funders had no  
37 further involvement other than providing financial support. No financial disclosures were reported by  
38 the authors of this paper.  
39  
40

41  
42 The collaborations of the authors were made possible by the GENIUS network. GENIUS is supported  
43 by the UK Prevention Research Partnership, an initiative funded by UK Research and Innovation  
44 Councils, the Department of Health and Social Care (England) and the UK devolved administrations,  
45 and leading health research charities.  
46  
47  
48  
49

50  
51 *Data Sharing Statement*

52  
53  
54 No additional data available.  
55

56  
57 *Figure Permissions*  
58  
59  
60

Usage rights have been obtained for all figures including those in the supplementary material.

## References

1. World Health Organisation (WHO). WHO announces COVID-19 outbreak a pandemic. <https://www.euro.who.int/en/health-topics/health-emergencies/coronavirus-covid-19/news/news/2020/3/who-announces-covid-19-outbreak-a-pandemic>. Published 2020. Accessed April 29, 2021.
2. British Broadcasting Company (BBC). Coronavirus confirmed as pandemic by World Health Organization.
3. Viner RM, Russell SJ, Croker H, et al. School closure and management practices during coronavirus outbreaks including COVID-19: a rapid systematic review. *Lancet Child Adolesc Heal*. 2020;4(5):397-404. doi:10.1016/S2352-4642(20)30095-X
4. Van Lancker W, Parolin Z. COVID-19, school closures, and child poverty: a social crisis in the making. *Lancet Public Heal*. 2020;5(5):243-244. doi:10.1016/S2468-2667(20)30084-0
5. Welsh Government. Statement from Minister for Education, Kirsty Williams on school closures in Wales.
6. Wang G, Zhang Y, Zhao J, Zhang J, Jiang F. Mitigate the effects of home confinement on children during the COVID-19 outbreak. *Lancet*. 2020;395(10228):945-947. doi:10.1016/S0140-6736(20)30547-X
7. Brooks SK, Smith LE, Webster RK, et al. The impact of unplanned school closure on children's social contact: Rapid evidence review. *Eurosurveillance*. 2020;25(13). doi:10.2807/1560-7917.ES.2020.25.13.2000188
8. Liu JJ, Bao Y, Huang X, Shi J, Lu L. Mental health considerations for children quarantined because of COVID-19. *Lancet Child Adolesc Heal*. 2020;4(5):347-349. doi:10.1016/S2352-4642(20)30096-1
9. Lyons RA, Jones KH, John G, et al. BMC Medical Informatics and The SAIL databank : linking multiple health and social care datasets. 2009;8:1-8. doi:10.1186/1472-6947-9-3
10. Levita L. Initial research findings on the impact of COVID-19 on the well-being of young people aged 13 to 24 in the UK. *Psychol Res Consort*. 2021;53(9):6. <http://dspace.ucuenca.edu.ec/bitstream/123456789/35612/1/Trabajo de Titulacion.pdf%0Ahttps://educacion.gob.ec/wp-content/uploads/downloads/2019/01/GUIA-METODOLOGICA-EF.pdf>.
11. The Children's Society. *Life on Hold*.; 2020. doi:10.1097/00129191-200210000-00005

12. World Health Organization (WHO). Considerations for school-related health measures in the context of COVID-19.
13. European Network of Ombudpersons for Children (ENOC) and United Nations International Children's Fund. Ombudpersons and Commissioners for Children's Challenges and Responses to Covid-19. <http://enoc.eu/wp-content/uploads/2020/06/ENOC-UNICEFF-COVID-19-survey-updated-synthesis-report-FV.pdf>. Published 2020.
14. United Nations Educational Scientific and Cultural Organisation (UNESCO). Adverse consequences of school closures. <https://en.unesco.org/covid19/educationresponse/consequences>. Published 2020.
15. European Centre for Disease Prevention and Control. COVID-19 in children and the role of school settings in COVID-19 transmission Key messages. 2020;(August).
16. Rundle AG, Park Y, Herbstman JB, Kinsey EW, Wang YC. COVID-19–Related School Closings and Risk of Weight Gain Among Children. *Obesity*. 2020;28(6):1008-1009. doi:10.1002/oby.22813
17. The DELVE Initiative. Balancing the Risks of Pupils Returning to Schools. DELVE Report No. 4. <https://rs-delve.github.io/reports/2020/07/24/balancing-the-risk-of-pupils-returning-to-schools.html>. Published 2020. Accessed January 7, 2021.
18. Marmot M, Allen J, Goldblatt P, Herd E, Morrison J. Build Back Fairer: The COVID-19 Marmot Review. The Pandemic, Socioeconomic and Health Inequalities in England. *London Inst Heal Equity*. 2020.
19. Engzell P, Frey A, Verhagen MD. Learning loss due to school closures during the COVID-19 pandemic. *Proc Natl Acad Sci U S A*. 2021;118(17). doi:10.1073/PNAS.2022376118
20. Singh S, Roy D, Sinha K, Parveen S, Sharma G, Joshi G. Impact of COVID-19 and lockdown on mental health of children and adolescents: A narrative review with recommendations. *Psychiatry Res*. 2020;293(August):113429. doi:10.1016/j.psychres.2020.113429
21. Day L, Percy-smith B, Rizzo S, Erskine C, Monchuk L, Shah M. *To Lockdown and Back: Research Report.*; 2020.
22. Todd C, Christian D, Davies H, et al. Headteachers' prior beliefs on child health and their engagement in school based health interventions: A qualitative study. *BMC Res Notes*. 2015;8(1):1-10. doi:10.1186/s13104-015-1091-2
23. Todd C, Chistian D, Tyler R, Stratton G, Brophy S. Developing HAPPEN (Health and Attainment of Pupils involved in a Primary Education Network): working in partnership to improve child health and education. *Perspect Public Health*. 2016;136(3):115-116. doi:10.1177/1757913916638231
24. Everson B, Mackintosh KA, McNarry MA, Todd C, Stratton G. Can Wearable Cameras be Used to Validate School-Aged Children's Lifestyle Behaviours? *Children*. 2019;6(2):20. doi:10.3390/children6020020

- 1  
2  
3 25. Ilie S, Sutherland A, Vignoles A. Revisiting free school meal eligibility as a proxy for pupil  
4 socio-economic deprivation. *Br Educ Res J*. 2017;43(2):253-274. doi:10.1002/berj.3260  
5  
6 26. Ford D V., Jones KH, Verplancke JP, et al. The SAIL Databank: Building a national  
7 architecture for e-health research and evaluation. *BMC Health Serv Res*. 2009;9:1-12.  
8 doi:10.1186/1472-6963-9-157  
9  
10 27. Deighton J, Tymms P, Vostanis P, et al. The Development of a School-Based Measure of  
11 Child Mental Health. *J Psychoeduc Assess*. 2013;31(3):247-257.  
12 doi:10.1177/0734282912465570  
13  
14 28. Statistics for Wales. Welsh Index of Multiple Deprivation. 2011:1-5.  
15 www.wales.gov.uk/statistics.  
16  
17 29. Marchant E, Todd C, James M, et al. *Primary School Staff Reflections on School Closures Due*  
18 *to COVID-19 and Recommendations for the Future : A National Qualitative Survey.*; 2020.  
19 doi:https://doi.org/10.1101/2020.11.06.20227108  
20  
21 30. Pabayo R, Belsky J, Gauvin L, Curtis S. Do area characteristics predict change in moderate-to-  
22 vigorous physical activity from ages 11 to 15 years? *Soc Sci Med*. 2011;72(3):430-438.  
23 doi:10.1016/j.socscimed.2010.09.039  
24  
25 31. Fry C. Sleep deprived but socially connected: balancing the risks and benefits of adolescent  
26 screen time during COVID-19. *J Child Media*. 2021;15(1):37-40.  
27 doi:10.1080/17482798.2020.1858907  
28  
29 32. Ogunleye AA, Voss C, Sandercock GR. Prevalence of high screen time in English youth:  
30 Association with deprivation and physical activity. *J Public Health (Bangkok)*. 2012;34(1):46-  
31 53. doi:10.1093/pubmed/fdr074  
32  
33 33. Andrew A, Cattan S, Dias MC, et al. Learning during the lockdown: real-time data on  
34 children's experiences during home learning: IFS Briefing note BN288. Institute for Fiscal  
35 Studies.  
36  
37 34. Sharp C, Nelson J, Lucas M, Julius J, McCrone T, Sims D. The challenges facing schools and  
38 pupils in September 2020. The National Foundation for Educational Research.  
39  
40 35. Feinstein L, Sabates R, Anderson TM, Sorhaindo A, Hammond C. Measuring The Effects of  
41 Education on Health and Civic engagement. *Proc Copenhagen Symp*. 2006:171-354.  
42 https://www.oecd.org/education/innovation-education/37425753.pdf.  
43  
44 36. Duijster D, Verrips GHW, Van Loveren C. The role of family functioning in childhood dental  
45 caries. *Community Dent Oral Epidemiol*. 2014;42(3):193-205. doi:10.1111/cdoe.12079  
46  
47 37. NHS Wales. Designed To Smile. https://www.designedtosmile.org/welcome-croeso/welcome/.  
48 Published 2020. Accessed January 7, 2021.  
49  
50 38. Parnham JC, Lavery AA, Majeed A, Vamos EP. Half of children entitled to free school meals  
51 did not have access to the scheme during COVID-19 lockdown in the UK. *Public Health*.  
52 2020;187(March):161-164. doi:10.1016/j.puhe.2020.08.019  
53  
54  
55  
56  
57  
58  
59  
60

- 1  
2  
3 39. Stewart CH, Dundas R, Leyland AH. The Scottish school leavers cohort: Linkage of education  
4 data to routinely collected records for mortality, hospital discharge and offspring birth  
5 characteristics. *BMJ Open*. 2017;7(7):1-18. doi:10.1136/bmjopen-2016-015027  
6  
7  
8 40. Shaw B, Baars S, Menzies L, Parameshwaran M, Allen R. Low income pupils' progress at  
9 secondary school. 2017;(February). [https://www.gov.uk/government/publications/low-income-](https://www.gov.uk/government/publications/low-income-pupils-progress-at-secondary-school)  
10 [pupils-progress-at-secondary-school](https://www.gov.uk/government/publications/low-income-pupils-progress-at-secondary-school).  
11  
12 41. Pearcey S, Shum A, Waite P, Patalay P, Creswell C. Changes in children and young people's  
13 emotional and behavioural difficulties through lockdown: The Co-SPACE Study.  
14 2020;(June):1-28.  
15  
16 42. Taylor C. The Reliability of Free School Meal Eligibility as a Measure of Socio-Economic  
17 Disadvantage: Evidence from the Millennium Cohort Study in Wales. *Br J Educ Stud*.  
18 2018;66(1):29-51. doi:10.1080/00071005.2017.1330464  
19  
20  
21  
22  
23  
24  
25  
26  
27  
28  
29  
30  
31  
32  
33  
34  
35  
36  
37  
38  
39  
40  
41  
42  
43  
44  
45  
46  
47  
48  
49  
50  
51  
52  
53  
54  
55  
56  
57  
58  
59  
60



Figure 1  
Study Flow Diagram

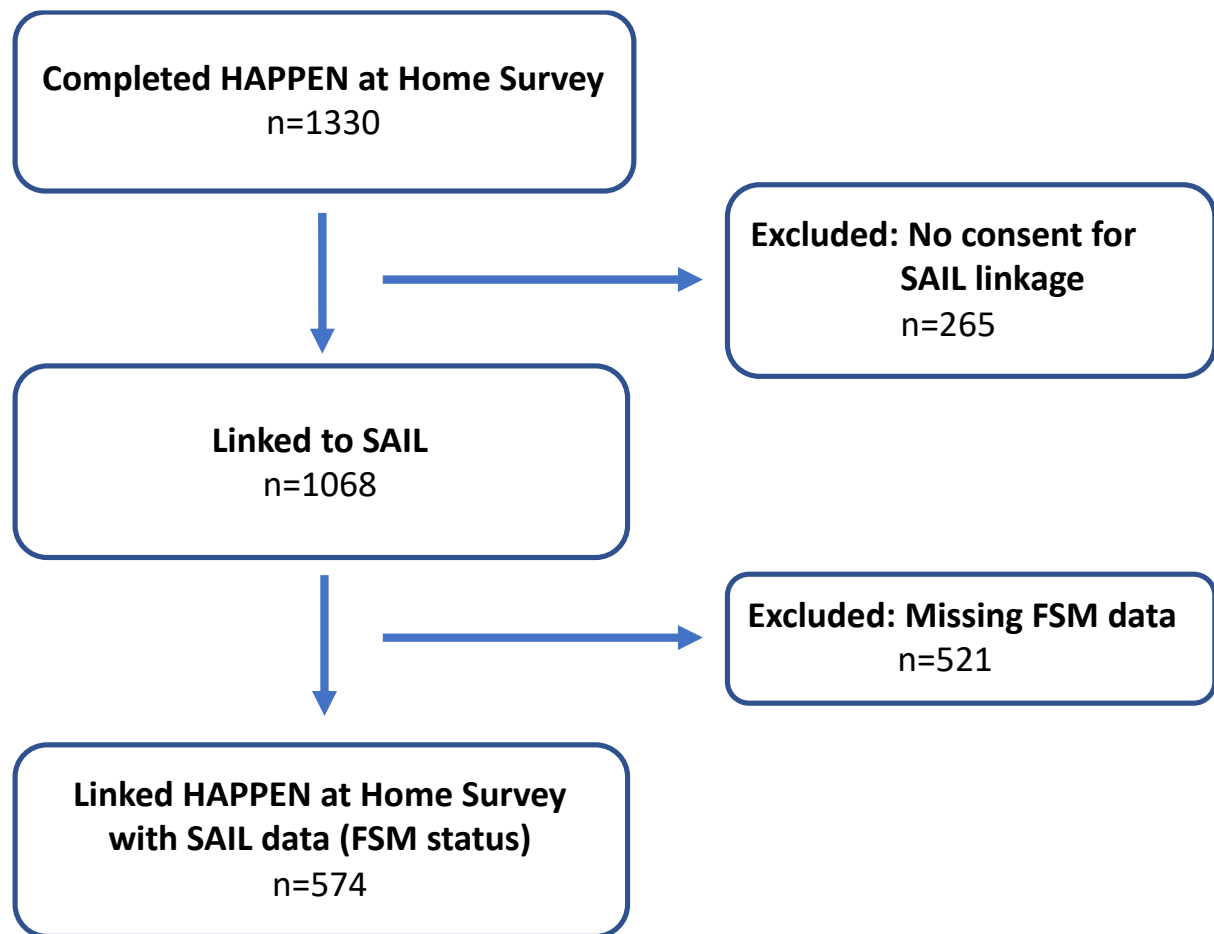

Figure 1 - Flow of HAPPEN study (exclusion process and data linkage)

1  
2  
3  
4 **S1**  
5 **ITEMS INCLUDED IN THE ANALYSES**  
6  
7

| Health and wellbeing topic                | Item within HAPPEN at Home Survey                                                                                                                                                                                                                                                                                                                                                                                                                                                                                                                                                                                                                                                                                                                                                        |
|-------------------------------------------|------------------------------------------------------------------------------------------------------------------------------------------------------------------------------------------------------------------------------------------------------------------------------------------------------------------------------------------------------------------------------------------------------------------------------------------------------------------------------------------------------------------------------------------------------------------------------------------------------------------------------------------------------------------------------------------------------------------------------------------------------------------------------------------|
| Physical activity and sedentary behaviour | <p data-bbox="810 383 1385 562"><i>“In the last 7 days, how many days did you do sports or exercise for at least 1 hour in total. This includes doing any activities (including online activities like Joe Wicks) or playing sports where your heart beat faster, you breathed faster and you felt warmer?” (e.g. 5-6 days)</i></p> <p data-bbox="810 600 1353 689"><i>“In the last 7 days, how many days did you watch TV/play online games/use the internet etc. for 2 or more hours a day (in total)?”</i></p> <p data-bbox="810 728 1374 786"><i>“What time did you wake up TODAY (to the nearest half hour)?”</i></p> <p data-bbox="810 824 1385 913"><i>“On a scale of 0 to 10 (0 being not very safe and 10 being very safe), how safe do you feel playing in your area?”</i></p> |
| Diet and dental health                    | <p data-bbox="810 920 1273 978"><i>“How many times did you brush your teeth YESTERDAY?”</i></p> <p data-bbox="810 1016 1369 1075"><i>“In the last 7 days, how many days did you drink at least one fizzy drink (e.g. coke, fanta, sprite)?”</i></p> <p data-bbox="810 1113 1214 1173"><i>“Did you eat any fruit and vegetables YESTERDAY?”</i></p>                                                                                                                                                                                                                                                                                                                                                                                                                                       |
| Wellbeing                                 | <p data-bbox="810 1180 1378 1238"><i>“On a scale of 0 to 10 (0 being very unhappy and 10 being very happy), how do you feel about:</i></p> <p data-bbox="810 1272 1011 1420"><i>Your Health?<br/>Your Family?<br/>Your Friends?<br/>Your Appearance?<br/>Your Life?”</i></p> <p data-bbox="810 1453 1374 1509"><i>*From the Good Childhood Index (2010) developed by the Children’s Society</i></p>                                                                                                                                                                                                                                                                                                                                                                                      |
| Mental health                             | <p data-bbox="810 1516 1353 1574"><i>“Remember, there are no right or wrong answers, just pick which is right for you.</i></p> <p data-bbox="810 1608 975 1697"><i>I feel lonely.<br/>I cry a lot.<br/>I am unhappy”</i></p> <p data-bbox="810 1731 1315 1765"><i>*From the Me and My Feelings Questionnaire</i></p>                                                                                                                                                                                                                                                                                                                                                                                                                                                                     |
| School                                    | <p data-bbox="810 1796 1378 1854"><i>“On a scale of 0 to 10 (0 being very unhappy and 10 being very happy), how do you feel about:</i></p> <p data-bbox="810 1888 970 1910"><i>Your School?”</i></p> <p data-bbox="810 1944 1374 2002"><i>*From the Good Childhood Index (2010) developed by the Children’s Society</i></p>                                                                                                                                                                                                                                                                                                                                                                                                                                                              |

1  
2  
3  
4  
5  
6  
7  
8  
9  
10  
11  
12  
13  
14  
15  
16  
17  
18  
19  
20  
21  
22  
23  
24  
25  
26  
27  
28  
29  
30  
31  
32  
33  
34  
35  
36  
37  
38  
39  
40  
41  
42  
43  
44  
45  
46  
47  
48  
49  
50  
51  
52  
53  
54  
55  
56  
57  
58  
59  
60

|  |                                                                                                                                                                                                           |
|--|-----------------------------------------------------------------------------------------------------------------------------------------------------------------------------------------------------------|
|  | <p><i>“Tell us if you agree or disagree with the following:</i></p> <p><i>I am doing well with my school work” (e.g. Strongly agree, agree, don’t agree or disagree, disagree, strongly disagree)</i></p> |
|--|-----------------------------------------------------------------------------------------------------------------------------------------------------------------------------------------------------------|

For peer review only

1  
2  
3 **S2**  
4 **THE 'HAPPEN AT HOME' SURVEY**  
5

6 Consent Form

7 Before you start please click this link to read the information sheet...  
8

9 <https://happen-wales.co.uk/childrens-information-sheet/>  
10

11 1. I have read the child information sheet and understand that if I take part I can change my mind at  
12 any time, and this will not be a problem at all. \*

13 *Mark only one oval.*  
14

- 15
- 16 • Yes
  - 17 • No
- 18  
19

20 2. I am happy for you to use my questionnaire for research. Only the researchers in the team will  
21 know my name and will not tell anyone else my answers \*

22 *Mark only one oval.*  
23

- 24
- 25 • Yes
  - 26 • No do not use my questionnaire
- 27  
28

29 3. I am happy for you to look at my school and health records to see how my school is doing (as a  
30 group). This is anonymous which means I cannot be identified \*

31 *Mark only one oval.*  
32

- 33
- 34 • Yes
  - 35 • No
- 36  
37

38 If you do not wish to take part in the questionnaire please do not continue.

39 Please click next to start the questionnaire!  
40  
41  
42  
43  
44  
45  
46  
47  
48  
49  
50  
51  
52  
53  
54  
55  
56  
57  
58  
59  
60

1  
2  
3 ABOUT YOU  
45 4. First Name\*  
67 5. Last Name\*  
89 6. Home Post Code\*  
10

11 7. What school do you go to?\*12

13 8. Are you still going to your school?\*14

15 *Mark only one oval.*  
16

- 17
- 18 • No, I am at home
  - 19 • Yes, most days of the week
  - 20 • Yes, sometimes
  - 21 • I am in a different school from my own school
- 22

23 9. Do you have any other children living in your house with you (brothers, sisters) ?  
2425 *Mark only one oval.*  
26

- 27
- 28 • Yes
  - 29 • No
- 30

31 10. How many people live in your home with you (including adults)?  
32

- 33
- 34 • 1
  - 35 • 2
  - 36 • 3
  - 37 • 4
  - 38 • 5
  - 39 • 6+
- 40

41 11. What year are you in now?\*42

43 *Mark only one oval.*  
44

- 45
- 46 • Year 4
  - 47 • Year 5
  - 48 • Year 6
- 49

50 12. Gender\*  
5152 *Mark only one oval.*  
53

- 54
- 55 • Boy
  - 56 • Girl
  - 57 • Prefer not to say
- 58

59 13. Date of Birth  
60Year\*  
5556 *Mark only one oval.*  
57

- 58
- 59 • 2007
  - 60 • 2008
  - 2009

- 1  
2  
3 • 2010  
4 • 2011  
5 • 2012  
6  
7

8 14. Month\*

9 *Mark only one oval.*

- 10  
11 • January  
12 • February  
13 • March  
14 • April  
15 • May  
16 • June  
17 • July  
18 • August  
19 • September  
20 • October  
21 • November  
22 • December  
23  
24  
25

26 15. Day \*

27 *Mark only one oval.*

- 28  
29 • 1  
30 • 2  
31 • 3  
32 • 4  
33 • 5  
34 • 6  
35 • 7  
36 • 8  
37 • 9  
38 • 10  
39 • 11  
40 • 12  
41 • 13  
42 • 14  
43 • 15  
44 • 16  
45 • 17  
46 • 18  
47 • 19  
48 • 20  
49 • 21  
50 • 22  
51 • 23  
52 • 24  
53 • 25  
54 • 26  
55 • 27  
56 • 28  
57 • 29  
58 • 30  
59  
60

- 31

**YESTERDAY**

16. What did you eat for breakfast YESTERDAY?

*Check all that apply.*

- Nothing
- Cereal like cocopops, frosties, sugar puffs, chocolate cereals
- Healthy cereal like e.g. porridge, weetabix, readybrek, muesli, branflakes, cornflakes
- Snacks like biscuits
- Fruit
- Toast
- Cooked breakfast
- Yoghurt
- Other:

17. Did you eat any fruit and veg YESTERDAY?

*Mark only one oval.*

- No
- 1 piece
- 2 or more fruit and veg

18. How many times did you brush your teeth YESTERDAY?

*Mark only one oval.*

- 0
- 1
- 2
- 3

19. What time did you fall asleep YESTERDAY (to the nearest half hour)?

*Mark only one oval.*

- 6.00pm
- 6.30pm
- 7:00pm
- 7:30pm
- 8:00pm
- 8:30pm
- 9:00pm
- 9:30pm
- 10:00pm
- 10:30pm
- 11:00pm
- 11:30pm
- 12:00am
- 12:30am
- 1:00am
- 1:30am
- 2:00am
- 3:00am
- 3:30am
- 4:00am

1  
2  
3 20. What time did you wake up TODAY (to the nearest half hour)?

4 *Mark only one oval.*

- 5  
6 • 5:00am  
7 • 5:30am  
8 • 6:00am  
9 • 6:30am  
10 • 7:00am  
11 • 7:30am  
12 • 8:00am  
13 • 8:30am  
14 • 9:00am  
15 • 9:30am  
16 • 10:00am  
17 • 10:30am  
18 • 11:00am  
19 • 11:30am  
20  
21

22 THE LAST WEEK

23 NOW think about what you did in the last 7 days...

24  
25 21. In the last 7 days, how many days did you do sports or exercise for at least 1 hour in total. This  
26 includes doing any activities (including online activities like Joe Wicks) or playing sports where your  
27 heart beat faster, you breathed faster, and you felt warmer?

28 *Mark only one oval.*

- 29  
30 • 0 days  
31 • 1-2 days  
32 • 3-4 days  
33 • 5-6 days  
34 • 7 days  
35  
36

37 22. In the last 7 days, how many days did you watch TV/play online games/use the internet etc. for 2  
38 or more hours a day (in total)?

39 *Mark only one oval.*

- 40  
41 • 0 days  
42 • 1-2 day  
43 • 3-4 days  
44 • 5-6 days  
45 • 7 days  
46  
47

48 23. In the last 7 days, how many days did you feel tired?

49 *Mark only one oval.*

- 50  
51 • 0 days  
52 • 1-2 days  
53 • 3-4 days  
54 • 5-6 days  
55 • 7 days  
56

57 24. In the last 7 days, how many days did you feel like you could concentrate/pay attention well on  
58 your schoolwork?

59 *Mark only one oval.*



- 0 days
- 1-2 days
- 3-4 days
- 5-6 days
- 7 days
- Don't do school work

25. In the last 7 days, how many days did you drink at least one fizzy drink (e.g. coke, fanta, sprite)  
*Mark only one oval.*

- 0 days
- 1-2 days
- 3-4 days
- 5-6 days
- 7 days

26. In the last 7 days, how many days did you eat at least one sugary snack (e.g. chocolate bar, sweets)

*Mark only one oval.*

- 0 days
- 1-2 days
- 3-4 days
- 5-6 days
- 7 days

27. In the last 7 days, how many days did you eat take away foods (e.g. Chinese takeaway)

*Mark only one oval.*

- 0 days
- 1-2 days
- 3-4 days
- 5-6 days
- 7 days

#### ACTIVITY AND YOUR AREA

28. On a scale of 0 to 10 (0 being not very safe and 10 being very safe), how safe do you feel playing in your area?

*Mark only one oval.*

- 0
- 1
- 2
- 3
- 4
- 5
- 6
- 7
- 8
- 9
- 10

29. From your house, can you easily walk to a park (for example a field, grassy area)?

1  
2  
3 *Mark only one oval.*  
4

- 5 • Yes
- 6 • No
- 7

8 30. From your house, can you easily walk to somewhere you can play?  
9

10 *Mark only one oval.*

- 11 • Yes
- 12 • No
- 13

14 31. Do you have a garden?  
15

- 16 • Yes
- 17 • No
- 18

19 32. How often do you go out to play outside?  
20

21 *Mark only one oval.*

- 22 • Most days
- 23 • A few days each week
- 24 • Hardly ever
- 25 • I don't play
- 26
- 27

28 33. Do you have enough time for play?  
29

30 *Mark only one oval.*

- 31 • Yes, I have loads
- 32 • Yes, it's just about enough
- 33 • No, I would like to have a bit more
- 34 • No, I need a lot more
- 35
- 36

37 34. What type of places do you play in?  
38

- 39 • In my house
- 40 • In my garden
- 41 • In the street
- 42 • On a local grassy area
- 43 • In a place with bushes, trees and flowers
- 44 • In the woods near my house
- 45 • On a football field near my house
- 46 • In my school playground
- 47 • Somewhere with water or sand in it
- 48 • On the bike or skate park
- 49 • Somewhere else:
- 50
- 51

52 35. Can you play in all the places you would like to?  
53

- 54 • I can play in all the places I would like to
- 55 • I can play in some of the places I would like to
- 56 • I can only play in a few places I would like to
- 57 • I can hardly play in any of the places I would like to
- 58
- 59

1  
2  
3 36. Do you have somewhere at home where you have space to relax  
4

- 5  
6  
7  
8
- Yes
  - Sometimes but not all the time
  - No

9  
10 YOU AND YOUR FEELINGS

11 This part of the survey is going to ask you how you feel. There are no right or wrong answers. You  
12 should just pick the answer which is best for you.  
13

14 37. Tell us if you agree or disagree with the following:

15 *Mark only one oval per row.*

16 I am doing well with my schoolwork  
17

- 18  
19  
20  
21  
22  
23  
24  
25  
26
- Strongly agree
  - Agree
  - Don't agree or disagree
  - Disagree
  - Strongly disagree
  - I don't know

- 27  
28  
29  
30  
31  
32  
33  
34
- I feel part of my school community Strongly agree
  - Agree
  - Don't agree or disagree
  - Disagree
  - Strongly disagree
  - I don't know

35  
36  
37 I have lots of choice over things that are important to me  
38

- 39  
40  
41  
42  
43  
44
- Strongly agree
  - Agree
  - Don't agree or disagree
  - Disagree
  - Strongly disagree

45 There are lots of things I'm good at  
46

- 47  
48  
49  
50  
51  
52
- Strongly agree
  - Agree
  - Don't agree or disagree
  - Disagree
  - Strongly disagree

53 38. On a scale of 0 to 10 (0 being very unhappy and 10 being very happy), how do you feel about  
54 \*Based on the Good Childhood Index by the Children's Society  
55

56 39. Your Health

57 *Mark only one oval.*

- 58  
59  
60
- 0

- 1
- 2
- 3
- 4
- 5
- 6
- 7
- 8
- 9
- 10

40. Your Family

*Mark only one oval.*

- 0
- 1
- 2
- 3
- 4
- 5
- 6
- 7
- 8
- 9
- 10

41. Your Friends

*Mark only one oval.*

- 0
- 1
- 2
- 3
- 4
- 5
- 6
- 7
- 8
- 9
- 10

42. Your Appearance (how you look)

*Mark only one oval.*

- 0
- 1
- 2
- 3
- 4
- 5
- 6
- 7
- 8
- 9

- 10

#### 43. Your Life

*Mark only one oval.*

- 0
- 1
- 2
- 3
- 4
- 5
- 6
- 7
- 8
- 9
- 10

#### ME AND MY FEELINGS

Based on the Me and My Feelings Questionnaire ( Deighton, Tymms, Vostanis, Belsky, Fonagy, Brown, Martin, Patalay, & Wolpert, 2012)

44. Remember, there are no right or wrong answers, just pick which is right for you.

*Mark only one oval per row.*

I feel lonely

- Never
- Sometimes
- Always

I cry a lot

- Never
- Sometimes
- Always

I am unhappy

- Never
- Sometimes
- Always

I feel nobody likes me

- Never
- Sometimes
- Always

I worry a lot

- Never
- Sometimes
- Always

1  
2  
3  
4 I have problems sleeping  
5

- 6 • Never
- 7 • Sometimes
- 8 • Always
- 9

10 I wake up in the night  
11

- 12 • Never
- 13 • Sometimes
- 14 • Always
- 15

16 I am shy  
17

- 18 • Never
- 19 • Sometimes
- 20 • Always
- 21

22 I feel scared  
23

- 24 • Never
- 25 • Sometimes
- 26 • Always
- 27

28 I worry when I am at school  
29

- 30 • Never
- 31 • Sometimes
- 32 • Always
- 33

34 I get very angry  
35

- 36 • Never
- 37 • Sometimes
- 38 • Always
- 39

40 I lose my temper  
41

- 42 • Never
- 43 • Sometimes
- 44 • Always
- 45

46 I hit out when I am angry  
47

- 48 • Never
- 49 • Sometimes
- 50 • Always
- 51

52 I do things to hurt people  
53

- 54 • Never
- 55 • Sometimes
- 56 • Always
- 57

1  
2  
3 I am calm  
4

- 5 • Never
- 6 • Sometimes
- 7 • Always
- 8

9  
10 I break things on purpose

- 11 • Never
- 12 • Sometimes
- 13 • Always
- 14

15  
16 45. Are you able to keep in touch with your family that you don't live with?

17 *Mark only one oval.*

- 18 • Yes
- 19 • No
- 20

21  
22 46. Are you able to keep in touch with your friends?

23 *Mark only one oval.*

- 24 • Yes
- 25 • No
- 26

27  
28 47. If yes, how are you keeping in touch (tick all that are relevant)?

- 29 • Live near them so I can see them (at a social distance)
- 30 • By phone (texting, calling or video calling)
- 31 • On social media
- 32 • On games consoles
- 33
- 34
- 35

36  
37 SUBMIT

38  
39 Don't forget to press submit below! Once you've pressed submit you are all done!

40  
41 If you'd like some additional resources while you're at home during COVID-19, we've put together  
42 some here:

43 <https://happen-wales.co.uk/some-resources-for-you/>

1  
2  
3 **S3**  
4 **THE HAPPEN SURVEY**  
5

6 Consent Form

7 Before you start please click this link to read the information sheet...  
8

9 <https://happen-wales.co.uk/childrens-information-sheet/>  
10

11 1. I have read the child information sheet and understand that if I take part I can change my mind at  
12 any time, and this will not be a problem at all. \*

13 *Mark only one oval.*  
14

- 15
- 16 • Yes
  - 17 • No
- 18  
19

20 2. I am happy for you to use my questionnaire for research. Only the researchers in the team will  
21 know my name and will not tell anyone else my answers \*

22 *Mark only one oval.*  
23

- 24
- 25 • Yes
  - 26 • No do not use my questionnaire
- 27  
28

29 3. I am happy for you to look at my school and health records to see how my school is doing (as a  
30 group). This is anonymous which means I cannot be identified \*

31 *Mark only one oval.*  
32

- 33
- 34 • Yes
  - 35 • No
- 36  
37

38 If you do not wish to take part in the questionnaire please do not continue.

39 Please click next to start the questionnaire!  
40  
41  
42  
43  
44  
45  
46  
47  
48  
49  
50  
51  
52  
53  
54  
55  
56  
57  
58  
59  
60



1  
2  
3 ABOUT YOU4  
5 4. First Name\*6  
7 5. Last Name\*8  
9 6. Home Post Code\*10  
11 7. What school do you go to?\*12  
13 8. Do you have any other children living in your house with you (brothers, sisters)?14  
15 *Mark only one oval.*

- 16
- 
- 17
- 18 • Yes
  - 19 • No

20  
21 9. What year are you in now?\*22  
23 *Mark only one oval.*

- 24
- 25 • Year 4
  - 26 • Year 5
  - 27 • Year 6

28  
29 10. Do you have a garden?\*

- 30
- 31 • Yes
  - 32 • No

33  
34 11. Gender\*35  
36 *Mark only one oval.*

- 37
- 38 • Boy
  - 39 • Girl
  - 40 • Prefer not to say

41  
42 12. Date of Birth43  
44 Year\*45  
46 *Mark only one oval.*

- 47
- 48 • 2007
  - 49 • 2008
  - 50 • 2009
  - 51 • 2010
  - 52 • 2011
  - 53 • 2012

54  
55 13. Month\*56  
57 *Mark only one oval.*

- 58
- 59 • January
  - 60 • February
  - March
  - April
  - May
  - June

- July
- August
- September
- October
- November
- December

14. Day \*  
*Mark only one oval.*

- 1
- 2
- 3
- 4
- 5
- 6
- 7
- 8
- 9
- 10
- 11
- 12
- 13
- 14
- 15
- 16
- 17
- 18
- 19
- 20
- 21
- 22
- 23
- 24
- 25
- 26
- 27
- 28
- 29
- 30
- 31

YESTERDAY

15. How did you get to school yesterday?\*

- On the bus
- On bike
- In the car/taxi
- Walked
- Ran/jogged
- Scooter
- Skateboarded/Rollerbladed

16. What did you have to eat for lunch yesterday?\*

- School dinner
- Packed lunch from home
- Nothing

17. What did you do for most of your breaktimes yesterday?\*

- Sat around inside or outside
- Ran around
- Stood around
- Walked around

18. How many friends did you play with yesterday?\*

- I like to play on my own
- 1-2
- 3-4
- 5 or more

19. Did you have an afternoon break yesterday?\*

- Yes
- No

20. How did you get home yesterday?\*

- On the bus
- On bike
- In the car/taxi
- Walked
- Ran/jogged
- Scooter
- Skateboarded/Rollerbladed

#### AFTER SCHOOL

21. How many portions of fruit and vegetables did you eat yesterday?\*

- 1
- 2
- 3
- 4
- 5
- 6
- 7
- 8

22. How many times did you brush your teeth yesterday?\*

- 0
- 1
- 2

- 3

23. What time did you fall asleep YESTERDAY (to the nearest half hour)?

*Mark only one oval.*

- 6.00pm
- 6.30pm
- 7:00pm
- 7:30pm
- 8:00pm
- 8:30pm
- 9:00pm
- 9:30pm
- 10:00pm
- 10:30pm
- 11:00pm
- 11:30pm
- 12:00am
- 12:30am
- 1:00am
- 1:30am
- 2:00am
- 3:00am
- 3:30am
- 4:00am

24. What time did you wake up TODAY (to the nearest half hour)?

*Mark only one oval.*

- 5:00am
- 5:30am
- 6:00am
- 6:30am
- 7:00am
- 7:30am
- 8:00am
- 8:30am
- 9:00am
- 9.30am
- 10.00am
- 10.30am
- 11.00am
- 11.30am

#### THE LAST WEEK

25. In the last 7 days, how many days did you do sports or exercise for at least 1 hour in total. This includes doing any activities (this includes any activities or playing sports where your heart beat faster, you breathed faster, and you felt warmer?)

*Mark only one oval.*

- 0 days
- 1-2 days
- 3-4 days
- 5-6 days

- 7 days

26. In the last 7 days, how many days did you watch TV/play online games/use the internet etc. for 2 or more hours a day (in total)?

*Mark only one oval.*

- 0 days
- 1-2 day
- 3-4 days
- 5-6 days
- 7 days

27. In the last 7 days, how many days did you feel tired?

*Mark only one oval.*

- 0 days
- 1-2 days
- 3-4 days
- 5-6 days
- 7 days

28. In the last 7 days, how many days did you feel like you could concentrate/pay attention well on your schoolwork?

*Mark only one oval.*

- 0 days
- 1-2 days
- 3-4 days
- 5-6 days
- 7 days
- Don't do school work

29. In the last 7 days, how many days did you drink at least one fizzy drink (e.g. coke, fanta, sprite)

*Mark only one oval.*

- 0 days
- 1-2 days
- 3-4 days
- 5-6 days
- 7 days

30. In the last 7 days, how many days did you eat at least one sugary snack (e.g. chocolate bar, sweets)

*Mark only one oval.*

- 0 days
- 1-2 days
- 3-4 days
- 5-6 days
- 7 days

31. In the last 7 days, how many days did you eat take away foods (e.g. Chinese takeaway)

*Mark only one oval.*

- 0 days

- 1-2 days
- 3-4 days
- 5-6 days
- 7 days

## SPORT AND ACTIVITY

32. These questions are going to ask you how you feel about physical activity (This includes any activity where your heart beats faster, you breathe faster and you feel warmer)

- I want to take part in physical activity
- I feel confident to take part in lots of different physical activities
- I am good at lots of different physical activities
- I understand why taking part in physical activity is good for me

32. How many times do you take part in sports club outside of school a week?

- 0
- 1
- 2
- 3
- 4
- 5
- 6
- 7
- 8
- 9
- 10

33. Can you ride a bike without stabilisers?

- Yes
- No

34. Can you swim 25 metres without a float or armbands? (This is 1 length in a standard swimming pool)

- Yes
- No

## YOU AND YOUR FEELINGS

35. Tell us if you agree or disagree with the following:

- I am doing well at school
- I feel part of my school community
- I have lots of choice over things that are important to me
- There are lots of things I'm good at

36. On a scale of 0 to 10 (0 being very unhappy and 10 being very happy), how do you feel about  
\*Based on the Good Childhood Index by the Children's Society

37. Your Health

*Mark only one oval.*

1  
2  
3  
4  
5  
6  
7  
8  
9  
10  
11  
12  
13  
14  
15  
16  
17  
18  
19  
20  
21  
22  
23  
24  
25  
26  
27  
28  
29  
30  
31  
32  
33  
34  
35  
36  
37  
38  
39  
40  
41  
42  
43  
44  
45  
46  
47  
48  
49  
50  
51  
52  
53  
54  
55  
56  
57  
58  
59  
60

- 0
- 1
- 2
- 3
- 4
- 5
- 6
- 7
- 8
- 9
- 10

38. Your School  
*Mark only one oval.*

- 0
- 1
- 2
- 3
- 4
- 5
- 6
- 7
- 8
- 9
- 10

38. Your Family  
*Mark only one oval.*

- 0
- 1
- 2
- 3
- 4
- 5
- 6
- 7
- 8
- 9
- 10

39. Your Friends  
*Mark only one oval.*

- 0
- 1
- 2
- 3
- 4
- 5
- 6
- 7
- 8
- 9

For peer review only

- 10

#### 40. Your Appearance

*Mark only one oval.*

- 0
- 1
- 2
- 3
- 4
- 5
- 6
- 7
- 8
- 9
- 10

#### 41. Your Life

*Mark only one oval.*

- 0
- 1
- 2
- 3
- 4
- 5
- 6
- 7
- 8
- 9
- 10

### YOU AND YOUR FEELINGS

This part of the survey is going to ask you how you feel. There are no right or wrong answers. You should just pick the answer which is best for you.

Based on the Me and My Feelings Questionnaire (Deighton, Tymms, Vostanis, Belsky, Fonagy, Brown, Martin, Patalay, & Wolpert, 2012)

42. Remember, there are no right or wrong answers, just pick which is right for you.

*Mark only one oval per row.*

I feel lonely

- Never
- Sometimes
- Always

I cry a lot

- Never
- Sometimes
- Always



1  
2  
3 I am unhappy  
4

- 5 • Never
- 6 • Sometimes
- 7 • Always

8  
9 I feel nobody likes me  
10

- 11 • Never
- 12 • Sometimes
- 13 • Always

14  
15 I worry a lot  
16

- 17 • Never
- 18 • Sometimes
- 19 • Always

20  
21 I have problems sleeping  
22

- 23 • Never
- 24 • Sometimes
- 25 • Always

26  
27 I wake up in the night  
28

- 29 • Never
- 30 • Sometimes
- 31 • Always

32  
33 I am shy  
34

- 35 • Never
- 36 • Sometimes
- 37 • Always

38  
39 I feel scared  
40

- 41 • Never
- 42 • Sometimes
- 43 • Always

44  
45 I worry when I am at school  
46

- 47 • Never
- 48 • Sometimes
- 49 • Always

50  
51 I get very angry  
52

- 53 • Never
- 54 • Sometimes
- 55 • Always

56  
57 I lose my temper  
58  
59  
60

- Never
- Sometimes
- Always

I hit out when I am angry

- Never
- Sometimes
- Always

I do things to hurt people

- Never
- Sometimes
- Always

I am calm

- Never
- Sometimes
- Always

I break things on purpose

- Never
- Sometimes
- Always

YOUR LOCAL AREA

43. On a scale of 0 to 10 (0 being not very safe and 10 being very safe), how safe do you feel playing in your area?

*Mark only one oval.*

- 0
- 1
- 2
- 3
- 4
- 5
- 6
- 7
- 8
- 9
- 10

44. From your house, can you easily walk to school?

*Mark only one oval.*

- Yes
- No

45. From your house, can you easily walk to a park (for example a field, grassy area)?

1  
2  
3 *Mark only one oval.*  
4

- 5 • Yes
- 6 • No
- 7

8 45. From your house, can you easily walk to a leisure centre/sports centre?  
9

10 *Mark only one oval.*

- 11 • Yes
- 12 • No
- 13

14 46. Can you play in all the places you would like to?  
15

- 16 • I can play in all the places I would like to
- 17 • I can play in some of the places I would like to
- 18 • I can only play in a few places I would like to
- 19 • I can hardly play in any of the places I would like to
- 20
- 21

22 47. Are you happy with the area that you live in?  
23

- 24 • Yes
- 25 • No
- 26

27 48. If you could change something to make you and your friends healthier and happier, what would  
28 you change... IN SCHOOL?  
29

30 49. If you could change something to make you and your friends healthier and happier, what would  
31 you change... OUT OF SCHOOL?  
32

33 Don't forget to press submit below!  
34

35 We have some resources on our website if you would like to learn more or would like to speak to  
36 someone... <https://happen-wales.co.uk/some-resources-for-you/> (<https://happen-wales.co.uk/some-resources-for-you/>)  
37  
38  
39  
40  
41  
42  
43  
44  
45  
46  
47  
48  
49  
50  
51  
52  
53  
54  
55  
56  
57  
58  
59  
60

**The RECORD statement – checklist of items, extended from the STROBE statement, that should be reported in observational studies using routinely collected health data.**

|                           | Item No. | STROBE items                                                                                                                                                                               | Location in manuscript where items are reported | RECORD items                                                                                                                                                                                                                                                                                                                                                                                                                                | Location in manuscript where items are reported |
|---------------------------|----------|--------------------------------------------------------------------------------------------------------------------------------------------------------------------------------------------|-------------------------------------------------|---------------------------------------------------------------------------------------------------------------------------------------------------------------------------------------------------------------------------------------------------------------------------------------------------------------------------------------------------------------------------------------------------------------------------------------------|-------------------------------------------------|
| <b>Title and abstract</b> |          |                                                                                                                                                                                            |                                                 |                                                                                                                                                                                                                                                                                                                                                                                                                                             |                                                 |
|                           | 1        | (a) Indicate the study's design with a commonly used term in the title or the abstract (b) Provide in the abstract an informative and balanced summary of what was done and what was found | a) P1<br>b) P2                                  | RECORD 1.1: The type of data used should be specified in the title or abstract. When possible, the name of the databases used should be included.<br><br>RECORD 1.2: If applicable, the geographic region and timeframe within which the study took place should be reported in the title or abstract.<br><br>RECORD 1.3: If linkage between databases was conducted for the study, this should be clearly stated in the title or abstract. | 1.1) P1<br>1.2) P1/2<br>1.3) P1/2               |
| <b>Introduction</b>       |          |                                                                                                                                                                                            |                                                 |                                                                                                                                                                                                                                                                                                                                                                                                                                             |                                                 |
| Background rationale      | 2        | Explain the scientific background and rationale for the investigation being reported                                                                                                       | P3                                              |                                                                                                                                                                                                                                                                                                                                                                                                                                             |                                                 |
| Objectives                | 3        | State specific objectives, including any prespecified hypotheses                                                                                                                           | P3                                              |                                                                                                                                                                                                                                                                                                                                                                                                                                             |                                                 |
| <b>Methods</b>            |          |                                                                                                                                                                                            |                                                 |                                                                                                                                                                                                                                                                                                                                                                                                                                             |                                                 |
| Study Design              | 4        | Present key elements of study design early in the paper                                                                                                                                    | P3                                              |                                                                                                                                                                                                                                                                                                                                                                                                                                             |                                                 |
| Setting                   | 5        | Describe the setting, locations, and relevant dates, including periods of recruitment, exposure, follow-up, and data collection                                                            | P5                                              |                                                                                                                                                                                                                                                                                                                                                                                                                                             |                                                 |

|                                                                                                                                                                                                            |          |                                                                                                                                                                                                                                                                                                                                                                                                                                                                                                                                                                                                                                                                                                                        |                                  |                                                                                                                                                                                                                                                                                                                                                                                                                                                                                                                                                                                                                                                                                                      |                                                 |
|------------------------------------------------------------------------------------------------------------------------------------------------------------------------------------------------------------|----------|------------------------------------------------------------------------------------------------------------------------------------------------------------------------------------------------------------------------------------------------------------------------------------------------------------------------------------------------------------------------------------------------------------------------------------------------------------------------------------------------------------------------------------------------------------------------------------------------------------------------------------------------------------------------------------------------------------------------|----------------------------------|------------------------------------------------------------------------------------------------------------------------------------------------------------------------------------------------------------------------------------------------------------------------------------------------------------------------------------------------------------------------------------------------------------------------------------------------------------------------------------------------------------------------------------------------------------------------------------------------------------------------------------------------------------------------------------------------------|-------------------------------------------------|
| <p>1<br/>2<br/>3<br/>4<br/>5<br/>6<br/>7<br/>8<br/>9<br/>10<br/>11<br/>12<br/>13<br/>14<br/>15<br/>16<br/>17<br/>18<br/>19<br/>20<br/>21<br/>22<br/>23<br/>24<br/>25<br/>26<br/>27</p> <p>Participants</p> | <p>6</p> | <p>(a) <i>Cohort study</i> - Give the eligibility criteria, and the sources and methods of selection of participants. Describe methods of follow-up<br/> <i>Case-control study</i> - Give the eligibility criteria, and the sources and methods of case ascertainment and control selection. Give the rationale for the choice of cases and controls<br/> <i>Cross-sectional study</i> - Give the eligibility criteria, and the sources and methods of selection of participants</p> <p>(b) <i>Cohort study</i> - For matched studies, give matching criteria and number of exposed and unexposed<br/> <i>Case-control study</i> - For matched studies, give matching criteria and the number of controls per case</p> | <p>a) P5<br/>b) P6</p>           | <p>RECORD 6.1: The methods of study population selection (such as codes or algorithms used to identify subjects) should be listed in detail. If this is not possible, an explanation should be provided.</p> <p>RECORD 6.2: Any validation studies of the codes or algorithms used to select the population should be referenced. If validation was conducted for this study and not published elsewhere, detailed methods and results should be provided.</p> <p>RECORD 6.3: If the study involved linkage of databases, consider use of a flow diagram or other graphical display to demonstrate the data linkage process, including the number of individuals with linked data at each stage.</p> | <p>6.1) P6<br/>6.2) NA<br/>6.3) P6/Figure 1</p> |
| <p>28<br/>29<br/>30<br/>31<br/>32<br/>33<br/>34</p> <p>Variables</p>                                                                                                                                       | <p>7</p> | <p>Clearly define all outcomes, exposures, predictors, potential confounders, and effect modifiers. Give diagnostic criteria, if applicable.</p>                                                                                                                                                                                                                                                                                                                                                                                                                                                                                                                                                                       | <p>P6</p>                        | <p>RECORD 7.1: A complete list of codes and algorithms used to classify exposures, outcomes, confounders, and effect modifiers should be provided. If these cannot be reported, an explanation should be provided.</p>                                                                                                                                                                                                                                                                                                                                                                                                                                                                               | <p>Supplementary Information</p>                |
| <p>35<br/>36<br/>37<br/>38<br/>39<br/>40<br/>41<br/>42</p> <p>Data sources/<br/>measurement</p>                                                                                                            | <p>8</p> | <p>For each variable of interest, give sources of data and details of methods of assessment (measurement). Describe comparability of assessment methods if there is more than one group</p>                                                                                                                                                                                                                                                                                                                                                                                                                                                                                                                            | <p>Supplementary Information</p> |                                                                                                                                                                                                                                                                                                                                                                                                                                                                                                                                                                                                                                                                                                      |                                                 |

|                                                                                                                                                    |                                  |    |                                                                                                                                                                                                                                                                                                                                                                                                                                                                                                                                                                      |                                                   |                                                                                                                                                       |                      |
|----------------------------------------------------------------------------------------------------------------------------------------------------|----------------------------------|----|----------------------------------------------------------------------------------------------------------------------------------------------------------------------------------------------------------------------------------------------------------------------------------------------------------------------------------------------------------------------------------------------------------------------------------------------------------------------------------------------------------------------------------------------------------------------|---------------------------------------------------|-------------------------------------------------------------------------------------------------------------------------------------------------------|----------------------|
| 1<br>2<br>3<br>4                                                                                                                                   | Bias                             | 9  | Describe any efforts to address potential sources of bias                                                                                                                                                                                                                                                                                                                                                                                                                                                                                                            | NA                                                |                                                                                                                                                       |                      |
| 5<br>6<br>7<br>8<br>9                                                                                                                              | Study size                       | 10 | Explain how the study size was arrived at                                                                                                                                                                                                                                                                                                                                                                                                                                                                                                                            | P6                                                |                                                                                                                                                       |                      |
| 10<br>11<br>12<br>13<br>14<br>15<br>16<br>17<br>18<br>19<br>20<br>21<br>22<br>23<br>24<br>25<br>26<br>27<br>28<br>29<br>30<br>31<br>32<br>33<br>34 | Quantitative variables           | 11 | Explain how quantitative variables were handled in the analyses. If applicable, describe which groupings were chosen, and why                                                                                                                                                                                                                                                                                                                                                                                                                                        | P6/7                                              |                                                                                                                                                       |                      |
| 35<br>36<br>37<br>38<br>39<br>40<br>41<br>42<br>43<br>44<br>45<br>46<br>47                                                                         | Statistical methods              | 12 | (a) Describe all statistical methods, including those used to control for confounding<br>(b) Describe any methods used to examine subgroups and interactions<br>(c) Explain how missing data were addressed<br>(d) <i>Cohort study</i> - If applicable, explain how loss to follow-up was addressed<br><i>Case-control study</i> - If applicable, explain how matching of cases and controls was addressed<br><i>Cross-sectional study</i> - If applicable, describe analytical methods taking account of sampling strategy<br>(e) Describe any sensitivity analyses | a) P6/7<br>b) P6/7<br>c) P6/7<br>d) NA<br>e) P6/7 |                                                                                                                                                       |                      |
|                                                                                                                                                    | Data access and cleaning methods |    | ..                                                                                                                                                                                                                                                                                                                                                                                                                                                                                                                                                                   |                                                   | RECORD 12.1: Authors should describe the extent to which the investigators had access to the database population used to create the study population. | 12.1) P6<br>12.2) P6 |

|                  |    |                                                                                                                                                                                                                                                                                                                                                 |                               |                                                                                                                                                                                                                                                                                                                    |    |
|------------------|----|-------------------------------------------------------------------------------------------------------------------------------------------------------------------------------------------------------------------------------------------------------------------------------------------------------------------------------------------------|-------------------------------|--------------------------------------------------------------------------------------------------------------------------------------------------------------------------------------------------------------------------------------------------------------------------------------------------------------------|----|
|                  |    |                                                                                                                                                                                                                                                                                                                                                 |                               | RECORD 12.2: Authors should provide information on the data cleaning methods used in the study.                                                                                                                                                                                                                    |    |
| Linkage          |    | ..                                                                                                                                                                                                                                                                                                                                              |                               | RECORD 12.3: State whether the study included person-level, institutional-level, or other data linkage across two or more databases. The methods of linkage and methods of linkage quality evaluation should be provided.                                                                                          | P6 |
| <b>Results</b>   |    |                                                                                                                                                                                                                                                                                                                                                 |                               |                                                                                                                                                                                                                                                                                                                    |    |
| Participants     | 13 | (a) Report the numbers of individuals at each stage of the study ( <i>e.g.</i> , numbers potentially eligible, examined for eligibility, confirmed eligible, included in the study, completing follow-up, and analysed)<br>(b) Give reasons for non-participation at each stage.<br>(c) Consider use of a flow diagram                          | a) P6<br>b) P6<br>c) Figure 1 | RECORD 13.1: Describe in detail the selection of the persons included in the study ( <i>i.e.</i> , study population selection) including filtering based on data quality, data availability and linkage. The selection of included persons can be described in the text and/or by means of the study flow diagram. | P6 |
| Descriptive data | 14 | (a) Give characteristics of study participants ( <i>e.g.</i> , demographic, clinical, social) and information on exposures and potential confounders<br>(b) Indicate the number of participants with missing data for each variable of interest<br>(c) <i>Cohort study</i> - summarise follow-up time ( <i>e.g.</i> , average and total amount) | a) P6<br>b) P6<br>c) NA       |                                                                                                                                                                                                                                                                                                                    |    |
| Outcome data     | 15 | <i>Cohort study</i> - Report numbers of outcome events or summary measures over time<br><i>Case-control study</i> - Report numbers in each exposure                                                                                                                                                                                             | P6                            |                                                                                                                                                                                                                                                                                                                    |    |

|                   |    |                                                                                                                                                                                                                                                                                                                                                                                                                 |                               |                                                                                                                                                                                                                                                                                                          |    |
|-------------------|----|-----------------------------------------------------------------------------------------------------------------------------------------------------------------------------------------------------------------------------------------------------------------------------------------------------------------------------------------------------------------------------------------------------------------|-------------------------------|----------------------------------------------------------------------------------------------------------------------------------------------------------------------------------------------------------------------------------------------------------------------------------------------------------|----|
|                   |    | category, or summary measures of exposure<br><i>Cross-sectional study</i> - Report numbers of outcome events or summary measures                                                                                                                                                                                                                                                                                |                               |                                                                                                                                                                                                                                                                                                          |    |
| Main results      | 16 | (a) Give unadjusted estimates and, if applicable, confounder-adjusted estimates and their precision (e.g., 95% confidence interval). Make clear which confounders were adjusted for and why they were included<br>(b) Report category boundaries when continuous variables were categorized<br>(c) If relevant, consider translating estimates of relative risk into absolute risk for a meaningful time period | a) P9/10<br>b) P9/10<br>c) NA |                                                                                                                                                                                                                                                                                                          |    |
| Other analyses    | 17 | Report other analyses done— e.g., analyses of subgroups and interactions, and sensitivity analyses                                                                                                                                                                                                                                                                                                              | P6/7                          |                                                                                                                                                                                                                                                                                                          |    |
| <b>Discussion</b> |    |                                                                                                                                                                                                                                                                                                                                                                                                                 |                               |                                                                                                                                                                                                                                                                                                          |    |
| Key results       | 18 | Summarise key results with reference to study objectives                                                                                                                                                                                                                                                                                                                                                        | P7 - P11                      |                                                                                                                                                                                                                                                                                                          |    |
| Limitations       | 19 | Discuss limitations of the study, taking into account sources of potential bias or imprecision. Discuss both direction and magnitude of any potential bias                                                                                                                                                                                                                                                      | P14                           | RECORD 19.1: Discuss the implications of using data that were not created or collected to answer the specific research question(s). Include discussion of misclassification bias, unmeasured confounding, missing data, and changing eligibility over time, as they pertain to the study being reported. | NA |
| Interpretation    | 20 | Give a cautious overall interpretation of results considering objectives,                                                                                                                                                                                                                                                                                                                                       | P11 - 14                      |                                                                                                                                                                                                                                                                                                          |    |



|                                                           |    |                                                                                                                                                               |            |                                                                                                                                                          |            |
|-----------------------------------------------------------|----|---------------------------------------------------------------------------------------------------------------------------------------------------------------|------------|----------------------------------------------------------------------------------------------------------------------------------------------------------|------------|
|                                                           |    | limitations, multiplicity of analyses, results from similar studies, and other relevant evidence                                                              |            |                                                                                                                                                          |            |
| Generalisability                                          | 21 | Discuss the generalisability (external validity) of the study results                                                                                         | P14        |                                                                                                                                                          |            |
| <b>Other Information</b>                                  |    |                                                                                                                                                               |            |                                                                                                                                                          |            |
| Funding                                                   | 22 | Give the source of funding and the role of the funders for the present study and, if applicable, for the original study on which the present article is based | P16        |                                                                                                                                                          |            |
| Accessibility of protocol, raw data, and programming code |    | ..                                                                                                                                                            | Throughout | RECORD 22.1: Authors should provide information on how to access any supplemental information such as the study protocol, raw data, or programming code. | Throughout |

\*Reference: Benchimol EI, Smeeth L, Guttman A, Harron K, Moher D, Petersen I, Sørensen HT, von Elm E, Langan SM, the RECORD Working Committee. The REporting of studies Conducted using Observational Routinely-collected health Data (RECORD) Statement. *PLoS Medicine* 2015; in press.

\*Checklist is protected under Creative Commons Attribution ([CC BY](https://creativecommons.org/licenses/by/4.0/)) license.
